# Supplementary material for: A single cell transcriptional portrait of embryoid body differentiation and comparison to progenitors of the developing embryo
Source: PubMed Central journal article supplement — Stem Cell Res. Author manuscript; Available in PMC 2019 Jun 17. (PMC6579609; doi:10.1016/j.scr.2018.07.022), 2018-07-29
Supplement: NIHMS1506388-supplement-6.pdf [file NIHMS1506388-supplement-6.pdf]

Supplementary Table 1: Enriched Gene Sets in Day 4 EBs

| Pathway                                                                          | Category   | P-value     | Adjusted P-value | Enrichment Score | Normalized Enrichment Score | Number   |         |
|----------------------------------------------------------------------------------|------------|-------------|------------------|------------------|-----------------------------|----------|---------|
|                                                                                  |            |             |                  |                  |                             | of Genes | Cluster |
| REACTOME_CELL_CYCLE_CHECKPOINTS                                                  | Cell Cycle | 5.45E-05    | 0.000788244      | 0.46567326       | 1.971441955                 | 128      | D4_G1   |
| REACTOME_REGULATION_OF_MITOTIC_CELL_CYCLE                                        | Cell Cycle | 5.63E-05    | 0.000788244      | 0.45058843       | 1.830132587                 | 92       | D4_G1   |
| GO_CHROMOSOME_ORGANIZATION_INVOLVED_IN_MEIOTIC_CELL_CYCLE                        | Cell Cycle | 0.005506467 | 0.038545268      | 0.50625106       | 1.703772172                 | 32       | D4_G1   |
| GO_MEIOTIC_CELL_CYCLE_PROCESS                                                    | Cell Cycle | 0.002152968 | 0.020094372      | 0.36231736       | 1.552069174                 | 141      | D4_G1   |
| GO_NEGATIVE_REGULATION_OF_MITOTIC_CELL_CYCLE                                     | Cell Cycle | 0.007644197 | 0.019457957      | -0.2855682       | -1.4093868                  | 231      | D4_G2   |
| GO_NEGATIVE_REGULATION_OF_CELL_CYCLE_G1_S_PHASE_TRANSITION                       | Cell Cycle | 0.017468775 | 0.037059486      | -0.3229518       | -1.43916919                 | 114      | D4_G2   |
| GO_CELL_CYCLE_G2_M_PHASE_TRANSITION                                              | Cell Cycle | 0.00225401  | 0.007889033      | -0.3162915       | -1.51716274                 | 186      | D4_G2   |
| GO_NEGATIVE_REGULATION_OF_CELL_CYCLE_G2_M_PHASE_TRANSITION                       | Cell Cycle | 0.018529743 | 0.037059486      | -0.4677188       | -1.58178502                 | 30       | D4_G2   |
| GO_REGULATION_OF_CELL_CYCLE_G2_M_PHASE_TRANSITION                                | Cell Cycle | 0.005949777 | 0.016659375      | -0.3764523       | -1.58182651                 | 81       | D4_G2   |
| KEGG_CELL_CYCLE                                                                  | Cell Cycle | 0.00182704  | 0.007308161      | -0.346759        | -1.58843761                 | 135      | D4_G2   |
| GO_MITOTIC_CELL_CYCLE_CHECKPOINT                                                 | Cell Cycle | 0.000780776 | 0.003643619      | -0.3486005       | -1.64328832                 | 165      | D4_G2   |
| GO_CHROMOSOME_ORGANIZATION_INVOLVED_IN_MEIOTIC_CELL_CYCLE                        | Cell Cycle | 0.00952876  | 0.022233772      | -0.4826906       | -1.65680232                 | 32       | D4_G2   |
| GO_NEGATIVE_REGULATION_OF_CELL_CYCLE_PHASE_TRANSITION                            | Cell Cycle | 0.000520111 | 0.002912621      | -0.3574413       | -1.68916442                 | 168      | D4_G2   |
| GO_REGULATION_OF_TRANSCRIPTION_INVOLVED_IN_G1_S_TRANSITION_OF_MITOTIC_CELL_CYCLE | Cell Cycle | 0.003117153 | 0.009697809      | -0.5281472       | -1.78614866                 | 30       | D4_G2   |
| GO_CELL_CYCLE_G1_S_PHASE_TRANSITION                                              | Cell Cycle | 8.75E-05    | 0.000612209      | -0.4149157       | -1.8811973                  | 127      | D4_G2   |
| GO_G1_S_TRANSITION_OF_MITOTIC_CELL_CYCLE                                         | Cell Cycle | 8.75E-05    | 0.000612209      | -0.4149157       | -1.8811973                  | 127      | D4_G2   |
| GO_CELL_CYCLE_CHECKPOINT                                                         | Cell Cycle | 8.69E-05    | 0.000612209      | -0.3996815       | -1.97347098                 | 232      | D4_G2   |
| GO_MEIOTIC_CELL_CYCLE_PROCESS                                                    | Cell Cycle | 8.72E-05    | 0.000612209      | -0.4387254       | -2.02084814                 | 141      | D4_G2   |
| GO_CHROMOSOME_ORGANIZATION_INVOLVED_IN_MEIOTIC_CELL_CYCLE                        | Cell Cycle | 0.001339585 | 0.037508372      | -0.5419175       | -1.85527449                 | 32       | D4_G3   |
| GO_CHROMOSOME_ORGANIZATION_INVOLVED_IN_MEIOTIC_CELL_CYCLE                        | Cell Cycle | 7.89E-05    | 0.001104101      | 0.70441776       | 2.279458235                 | 32       | D4_G5   |
| GO_MEIOTIC_CELL_CYCLE_PROCESS                                                    | Cell Cycle | 6.22E-05    | 0.001104101      | 0.49993804       | 2.09038425                  | 141      | D4_G5   |
| GO_CHROMOSOME_ORGANIZATION_INVOLVED_IN_MEIOTIC_CELL_CYCLE                        | Cell Cycle | 6.13E-05    | 0.000858474      | 0.63814826       | 1.984245865                 | 32       | D4_G6   |
| GO_MEIOTIC_CELL_CYCLE_PROCESS                                                    | Cell Cycle | 5.16E-05    | 0.000858474      | 0.49903468       | 1.891554327                 | 141      | D4_G6   |
| REACTOME_CELL_CYCLE_CHECKPOINTS                                                  | Cell Cycle | 0.003737542 | 0.034883721      | 0.40037114       | 1.507452841                 | 128      | D4_G6   |
| GO_REGULATION_OF_CELL_CYCLE_G2_M_PHASE_TRANSITION                                | Cell Cycle | 0.020933977 | 0.045088567      | -0.2771773       | -1.44119544                 | 81       | D4_G7   |
| GO_NEGATIVE_REGULATION_OF_CELL_CYCLE_PHASE_TRANSITION                            | Cell Cycle | 0.013513514 | 0.031531532      | -0.242006        | -1.44515047                 | 168      | D4_G7   |
| GO_REGULATION_OF_CELL_CYCLE_CHECKPOINT                                           | Cell Cycle | 0.012526096 | 0.031531532      | -0.3865298       | -1.70442986                 | 41       | D4_G7   |
| GO_MITOTIC_CELL_CYCLE_CHECKPOINT                                                 | Cell Cycle | 0.012345679 | 0.031531532      | -0.3274735       | -1.95457101                 | 165      | D4_G7   |
| REACTOME_REGULATION_OF_MITOTIC_CELL_CYCLE                                        | Cell Cycle | 0.002207506 | 0.015452539      | -0.3920548       | -2.10494951                 | 92       | D4_G7   |
| GO_NEGATIVE_REGULATION_OF_CELL_CYCLE_G2_M_PHASE_TRANSITION                       | Cell Cycle | 0.001100514 | 0.01027146       | -0.5372949       | -2.17178803                 | 30       | D4_G7   |
| GO_MEIOTIC_CELL_CYCLE_PROCESS                                                    | Cell Cycle | 0.008196721 | 0.025500911      | -0.4163729       | -2.41657397                 | 141      | D4_G7   |
| GO_CELL_CYCLE_G1_S_PHASE_TRANSITION                                              | Cell Cycle | 0.005681818 | 0.022857143      | -0.4321796       | -2.4658561                  | 127      | D4_G7   |
| GO_G1_S_TRANSITION_OF_MITOTIC_CELL_CYCLE                                         | Cell Cycle | 0.005681818 | 0.022857143      | -0.4321796       | -2.4658561                  | 127      | D4_G7   |
| KEGG_CELL_CYCLE                                                                  | Cell Cycle | 0.007042254 | 0.024647887      | -0.4453025       | -2.55231662                 | 135      | D4_G7   |
| REACTOME_CELL_CYCLE_CHECKPOINTS                                                  | Cell Cycle | 0.005714286 | 0.022857143      | -0.468991        | -2.67105827                 | 128      | D4_G7   |
| GO_CHROMOSOME_ORGANIZATION_INVOLVED_IN_MEIOTIC_CELL_CYCLE                        | Cell Cycle | 0.000394789 | 0.005527043      | -0.6593934       | -2.70895681                 | 32       | D4_G7   |
| GO_REGULATION_OF_TRANSCRIPTION_INVOLVED_IN_G1_S_TRANSITION_OF_MITOTIC_CELL_CYCLE | Cell Cycle | 0.000366838 | 0.005527043      | -0.6725465       | -2.71848583                 | 30       | D4_G7   |
| GO_REGULATION_OF_CELL_CYCLE_CHECKPOINT                                           | Cell Cycle | 0.028847997 | 0.047514348      | -0.3776023       | -1.51344345                 | 41       | D4_G8   |
| GO_POSITIVE_REGULATION_OF_MITOTIC_CELL_CYCLE                                     | Cell Cycle | 0.003649231 | 0.006386155      | -0.2958439       | -1.55447252                 | 148      | D4_G8   |
| GO_NEGATIVE_REGULATION_OF_CELL_CYCLE_PHASE_TRANSITION                            | Cell Cycle | 0.001455441 | 0.002716823      | -0.2931759       | -1.57337362                 | 168      | D4_G8   |
| GO_CELL_CYCLE_G2_M_PHASE_TRANSITION                                              | Cell Cycle | 0.000455737 | 0.000981586      | -0.3111729       | -1.70087194                 | 186      | D4_G8   |
| GO_REGULATION_OF_CELL_CYCLE_G2_M_PHASE_TRANSITION                                | Cell Cycle | 0.001125665 | 0.00225133       | -0.3674987       | -1.72444445                 | 81       | D4_G8   |
| REACTOME_REGULATION_OF_MITOTIC_CELL_CYCLE                                        | Cell Cycle | 0.000311494 | 0.00072682       | -0.3647323       | -1.75883837                 | 92       | D4_G8   |
| GO_NEGATIVE_REGULATION_OF_MITOTIC_CELL_CYCLE                                     | Cell Cycle | 0.000117564 | 0.000329839      | -0.3186096       | -1.79940498                 | 231      | D4_G8   |
| GO_MITOTIC_CELL_CYCLE_CHECKPOINT                                                 | Cell Cycle | 0.000111309 | 0.000329839      | -0.3520881       | -1.88653163                 | 165      | D4_G8   |
| KEGG_CELL_CYCLE                                                                  | Cell Cycle | 0.000216826 | 0.00055192       | -0.3865567       | -2.00297582                 | 135      | D4_G8   |
| GO_CELL_CYCLE_CHECKPOINT                                                         | Cell Cycle | 0.0001178   | 0.000329839      | -0.3550583       | -2.00526778                 | 232      | D4_G8   |
| GO_CHROMOSOME_ORGANIZATION_INVOLVED_IN_MEIOTIC_CELL_CYCLE                        | Cell Cycle | 9.38E-05    | 0.000329839      | -0.5795041       | -2.17426978                 | 32       | D4_G8   |

|                                                                                  |             |             |             |            |             |     |       |
|----------------------------------------------------------------------------------|-------------|-------------|-------------|------------|-------------|-----|-------|
| GO_NEGATIVE_REGULATION_OF_CELL_CYCLE_G2_M_PHASE_TRANSITION                       | Cell Cycle  | 9.35E-05    | 0.000329839 | -0.5992764 | -2.21313106 | 30  | D4_G8 |
| GO_REGULATION_OF_TRANSCRIPTION_INVOLVED_IN_G1_S_TRANSITION_OF_MITOTIC_CELL_CYCLE | Cell Cycle  | 9.35E-05    | 0.000329839 | -0.6016363 | -2.22184624 | 30  | D4_G8 |
| REACTOME_CELL_CYCLE_CHECKPOINTS                                                  | Cell Cycle  | 0.000107032 | 0.000329839 | -0.4416701 | -2.26592862 | 128 | D4_G8 |
| GO_CELL_CYCLE_G1_S_PHASE_TRANSITION                                              | Cell Cycle  | 0.000107296 | 0.000329839 | -0.458901  | -2.34989563 | 127 | D4_G8 |
| GO_G1_S_TRANSITION_OF_MITOTIC_CELL_CYCLE                                         | Cell Cycle  | 0.000107296 | 0.000329839 | -0.458901  | -2.34989563 | 127 | D4_G8 |
| GO_MEIOTIC_CELL_CYCLE_PROCESS                                                    | Cell Cycle  | 0.000109601 | 0.000329839 | -0.4534328 | -2.36529797 | 141 | D4_G8 |
| GO_BLASTOCYST_DEVELOPMENT                                                        | Development | 0.004385185 | 0.010796437 | 0.43122112 | 1.633718552 | 60  | D4_G1 |
| GO_MORPHOGENESIS_OF_EMBRYONIC_EPITHELIUM                                         | Development | 0.017137097 | 0.035459206 | -0.2215741 | -1.28382687 | 178 | D4_G1 |
| GO_POSITIVE_REGULATION_OF_DEVELOPMENTAL_GROWTH                                   | Development | 0.010791367 | 0.02358338  | -0.2250804 | -1.33301155 | 202 | D4_G1 |
| GO_NEURAL_TUBE_DEVELOPMENT                                                       | Development | 0.004329004 | 0.010726004 | -0.2270135 | -1.35633583 | 219 | D4_G1 |
| GO_MESODERM_DEVELOPMENT                                                          | Development | 0.016254417 | 0.033994453 | -0.2442873 | -1.36511703 | 139 | D4_G1 |
| GO_POSITIVE_REGULATION_OF_CELL_MORPHOGENESIS_INVOLVED_IN_DIFFERENTIATION         | Development | 0.003539823 | 0.009059152 | -0.2264707 | -1.36852078 | 238 | D4_G1 |
| GO_REGULATION_OF_MUSCLE_CELL_DIFFERENTIATION                                     | Development | 0.002051282 | 0.005699634 | -0.2393404 | -1.38925409 | 180 | D4_G1 |
| GO_REGULATION_OF_MUSCLE_TISSUE_DEVELOPMENT                                       | Development | 0.011757022 | 0.025267853 | -0.252281  | -1.40178011 | 133 | D4_G1 |
| GO_GASTRULATION                                                                  | Development | 0.003456221 | 0.008903775 | -0.239583  | -1.40730548 | 195 | D4_G1 |
| GO_MAMMARY_GLAND_DEVELOPMENT                                                     | Development | 0.004487659 | 0.010979241 | -0.2520736 | -1.41703846 | 145 | D4_G1 |
| GO_MAMMARY_GLAND_EPITHELIUM_DEVELOPMENT                                          | Development | 0.012841756 | 0.027297504 | -0.2784469 | -1.42385544 | 82  | D4_G1 |
| GO_NEUROEPITHELIAL_CELL_DIFFERENTIATION                                          | Development | 0.010429704 | 0.022921778 | -0.2784032 | -1.42993901 | 84  | D4_G1 |
| GO_OSTEOBLAST_DIFFERENTIATION                                                    | Development | 0.002014099 | 0.005636578 | -0.2469053 | -1.43071911 | 177 | D4_G1 |
| GO_CARDIAC_MUSCLE_TISSUE_MORPHOGENESIS                                           | Development | 0.011184756 | 0.0241715   | -0.281835  | -1.44118057 | 82  | D4_G1 |
| GO_ENDOTHELIUM_DEVELOPMENT                                                       | Development | 0.006550218 | 0.014814157 | -0.265461  | -1.44666354 | 115 | D4_G1 |
| GO_LUNG_MORPHOGENESIS                                                            | Development | 0.0231467   | 0.046653193 | -0.3033726 | -1.4515022  | 58  | D4_G1 |
| GO_POSITIVE_REGULATION_OF_MUSCLE_CELL_DIFFERENTIATION                            | Development | 0.00952381  | 0.021049784 | -0.2808644 | -1.46624985 | 93  | D4_G1 |
| GO_MESENCHYME_MORPHOGENESIS                                                      | Development | 0.023532669 | 0.04718664  | -0.3273156 | -1.48990979 | 47  | D4_G1 |
| GO_VENTRICULAR_SEPTUM_DEVELOPMENT                                                | Development | 0.009376127 | 0.020841791 | -0.3004701 | -1.4926651  | 70  | D4_G1 |
| GO_CARDIAC_SEPTUM_DEVELOPMENT                                                    | Development | 0.004872107 | 0.011771737 | -0.2702983 | -1.49469819 | 127 | D4_G1 |
| GO_CARDIAC_MUSCLE_TISSUE_DEVELOPMENT                                             | Development | 0.002118644 | 0.005845053 | -0.2555068 | -1.49742692 | 188 | D4_G1 |
| GO_VENTRICULAR_CARDIAC_MUSCLE_TISSUE_DEVELOPMENT                                 | Development | 0.005884516 | 0.013465158 | -0.2999628 | -1.49819846 | 72  | D4_G1 |
| GO_DENDRITE_DEVELOPMENT                                                          | Development | 0.00266489  | 0.007100289 | -0.2699189 | -1.49876188 | 134 | D4_G1 |
| GO_BONE_DEVELOPMENT                                                              | Development | 0.001219512 | 0.004198144 | -0.2540735 | -1.50604257 | 205 | D4_G1 |
| GO_CEREBRAL_CORTEX_DEVELOPMENT                                                   | Development | 0.000859107 | 0.003341924 | -0.2635168 | -1.51236792 | 163 | D4_G1 |
| GO_SKIN_EPIDERMIS_DEVELOPMENT                                                    | Development | 0.00539707  | 0.012647351 | -0.3001644 | -1.51426022 | 76  | D4_G1 |
| GO_MESODERM_MORPHOGENESIS                                                        | Development | 0.006349206 | 0.014443516 | -0.290145  | -1.51469911 | 93  | D4_G1 |
| GO_CARDIAC_ATRIUM_DEVELOPMENT                                                    | Development | 0.02247191  | 0.045767398 | -0.3493363 | -1.53118038 | 40  | D4_G1 |
| GO_COLUMNAR_CUBOIDAL_EPITHELIAL_CELL_DIFFERENTIATION                             | Development | 0.001852996 | 0.005330687 | -0.2781902 | -1.53832703 | 128 | D4_G1 |
| GO_HINDBRAIN_DEVELOPMENT                                                         | Development | 0.00125     | 0.004265351 | -0.260256  | -1.54276259 | 206 | D4_G1 |
| GO_HINDLIMB_MORPHOGENESIS                                                        | Development | 0.018896834 | 0.03868878  | -0.3534565 | -1.54924002 | 40  | D4_G1 |
| GO_EMBRYONIC_PATTERN_SPECIFICATION                                               | Development | 0.004950495 | 0.0118873   | -0.3054652 | -1.55660425 | 81  | D4_G1 |
| GO_POSITIVE_REGULATION_OF_GLIAL_CELL_DIFFERENTIATION                             | Development | 0.017976989 | 0.037000259 | -0.3641742 | -1.55707906 | 36  | D4_G1 |
| GO_REGULATION_OF_EPITHELIAL_CELL_DIFFERENTIATION                                 | Development | 0.002301496 | 0.006304802 | -0.2872881 | -1.57628402 | 121 | D4_G1 |
| GO_PHARYNGEAL_SYSTEM_DEVELOPMENT                                                 | Development | 0.022648084 | 0.045885961 | -0.3908056 | -1.57769373 | 29  | D4_G1 |
| GO_PALLIUM_DEVELOPMENT                                                           | Development | 0.001814882 | 0.005268575 | -0.2614307 | -1.58176341 | 241 | D4_G1 |
| GO_ENDOTHELIAL_CELL_DIFFERENTIATION                                              | Development | 0.003258845 | 0.008472968 | -0.3006825 | -1.58533111 | 96  | D4_G1 |
| GO_CRANIAL_SKELETAL_SYSTEM_DEVELOPMENT                                           | Development | 0.003041825 | 0.008049456 | -0.3158469 | -1.58742128 | 75  | D4_G1 |
| GO_POSITIVE_REGULATION_OF_EPITHELIAL_CELL_DIFFERENTIATION                        | Development | 0.004691899 | 0.011407179 | -0.3324556 | -1.59065164 | 58  | D4_G1 |
| GO_FEMALE_SEX_DIFFERENTIATION                                                    | Development | 0.001736111 | 0.005077799 | -0.2891937 | -1.59615281 | 123 | D4_G1 |
| GO_LIMBIC_SYSTEM_DEVELOPMENT                                                     | Development | 0.000714286 | 0.003307823 | -0.2845347 | -1.59812469 | 142 | D4_G1 |
| GO_NEGATIVE_REGULATION_OF_DEVELOPMENTAL_GROWTH                                   | Development | 0.002006018 | 0.005636578 | -0.2976219 | -1.6046156  | 107 | D4_G1 |
| GO_EPITHELIAL_TUBE_BRANCHING_INVOLVED_IN_LUNG_MORPHOGENESIS                      | Development | 0.013535589 | 0.02846132  | -0.3879987 | -1.61517436 | 33  | D4_G1 |
| GO_SMOOTH_MUSCLE_CELL_DIFFERENTIATION                                            | Development | 0.013089652 | 0.027673231 | -0.3719707 | -1.61607554 | 38  | D4_G1 |
| GO_OLFACTORY_LOBE_DEVELOPMENT                                                    | Development | 0.005269321 | 0.012422823 | -0.3466217 | -1.62255016 | 53  | D4_G1 |
| GO_DEVELOPMENTAL_CELL_GROWTH                                                     | Development | 0.001955034 | 0.005551156 | -0.3049829 | -1.63240925 | 103 | D4_G1 |

|                                                                 |             |             |             |            |             |     |       |
|-----------------------------------------------------------------|-------------|-------------|-------------|------------|-------------|-----|-------|
| GO DEVELOPMENTAL_GROWTH_INVOLVED_IN_MORPHOGENESIS               | Development | 0.000693963 | 0.003292091 | -0.2920836 | -1.63333897 | 138 | D4_G1 |
| GO ENDOCARDIAL_CUSHION_DEVELOPMENT                              | Development | 0.0078125   | 0.017566835 | -0.3628918 | -1.637439   | 45  | D4_G1 |
| GO PERICARDIUM_DEVELOPMENT                                      | Development | 0.017070601 | 0.035459206 | -0.4201528 | -1.64065598 | 26  | D4_G1 |
| GO STEM_CELL_DIFFERENTIATION                                    | Development | 0.001519757 | 0.004688983 | -0.2745166 | -1.64389291 | 224 | D4_G1 |
| GO EXOCRINE_SYSTEM_DEVELOPMENT                                  | Development | 0.003753519 | 0.009543261 | -0.3451531 | -1.65140337 | 58  | D4_G1 |
| GO PATTERNING_OF_BLOOD_VESSELS                                  | Development | 0.001389854 | 0.004468209 | -0.3366449 | -1.65488309 | 67  | D4_G1 |
| GO GLAND_MORPHOGENESIS                                          | Development | 0.000609013 | 0.003149377 | -0.2994547 | -1.65592708 | 127 | D4_G1 |
| GO DENDRITE_MORPHOGENESIS                                       | Development | 0.002411576 | 0.00656016  | -0.3267015 | -1.6599421  | 79  | D4_G1 |
| GO ENDOCARDIAL_CUSHION_MORPHOGENESIS                            | Development | 0.011064395 | 0.02404497  | -0.4080164 | -1.66195864 | 30  | D4_G1 |
| GO GLIAL_CELL_DEVELOPMENT                                       | Development | 0.001360544 | 0.004447493 | -0.3190464 | -1.66557903 | 93  | D4_G1 |
| GO NEGATIVE_REGULATION_OF_VASCULATURE_DEVELOPMENT               | Development | 0.001344086 | 0.004430928 | -0.3199465 | -1.66895472 | 92  | D4_G1 |
| GO GLANDULAR_EPITHELIAL_CELL_DIFFERENTIATION                    | Development | 0.005737705 | 0.013206907 | -0.369048  | -1.67116488 | 46  | D4_G1 |
| GO CARDIAC_VENTRICLE_DEVELOPMENT                                | Development | 0.000807103 | 0.003340031 | -0.2931438 | -1.67224709 | 156 | D4_G1 |
| GO CARDIAC_CHAMBER_DEVELOPMENT                                  | Development | 0.001333333 | 0.004430928 | -0.2805075 | -1.67320494 | 213 | D4_G1 |
| GO POSITIVE_REGULATION_OF_STEM_CELL_DIFFERENTIATION             | Development | 0.000724638 | 0.003316283 | -0.3362803 | -1.67814321 | 71  | D4_G1 |
| GO EMBRYONIC_CAMERA_TYPE_EYE_DEVELOPMENT                        | Development | 0.004098361 | 0.01021963  | -0.3595042 | -1.68285362 | 53  | D4_G1 |
| GO SOMITE_DEVELOPMENT                                           | Development | 0.001504514 | 0.004682046 | -0.3123213 | -1.68386682 | 107 | D4_G1 |
| GO REGULATION_OF_GLIAL_CELL_DIFFERENTIATION                     | Development | 0.001607717 | 0.004737893 | -0.33151   | -1.68437384 | 79  | D4_G1 |
| GO REGULATION_OF_TRANSCRIPTION_INVOLVED_IN_CELL_FATE_COMMITMENT | Development | 0.012012645 | 0.025675378 | -0.432266  | -1.68795678 | 26  | D4_G1 |
| GO AORTA_DEVELOPMENT                                            | Development | 0.00088968  | 0.003416101 | -0.3294272 | -1.71481757 | 91  | D4_G1 |
| GO POST_EMBRYONIC_DEVELOPMENT                                   | Development | 0.000632511 | 0.003149377 | -0.3107217 | -1.71821142 | 130 | D4_G1 |
| GO RETINA_VASCULATURE_DEVELOPMENT_IN_CAMERA_TYPE_EYE            | Development | 0.005615234 | 0.013058178 | -0.3996756 | -1.72203091 | 37  | D4_G1 |
| GO MUSCLE_ORGAN_MORPHOGENESIS                                   | Development | 0.000486145 | 0.002988033 | -0.3257515 | -1.72855942 | 100 | D4_G1 |
| GO REGULATION_OF_BIOMINERAL_TISSUE_DEVELOPMENT                  | Development | 0.001563966 | 0.004688983 | -0.3617428 | -1.73077741 | 58  | D4_G1 |
| GO HEART TRABECULA_MORPHOGENESIS                                | Development | 0.005639522 | 0.013058178 | -0.4224559 | -1.73246337 | 31  | D4_G1 |
| GO COCHLEA_MORPHOGENESIS                                        | Development | 0.005055147 | 0.012064124 | -0.4192239 | -1.73399823 | 32  | D4_G1 |
| GO PERIPHERAL_NERVOUS_SYSTEM_DEVELOPMENT                        | Development | 0.0008285   | 0.003341924 | -0.338108  | -1.73551698 | 83  | D4_G1 |
| GO STEM_CELL_PROLIFERATION                                      | Development | 0.000406669 | 0.00287471  | -0.3412114 | -1.73672794 | 80  | D4_G1 |
| GO HYPOTHALAMUS_DEVELOPMENT                                     | Development | 0.008851423 | 0.019788525 | -0.4453936 | -1.73921893 | 26  | D4_G1 |
| GO ENDOCRINE_PANCREAS_DEVELOPMENT                               | Development | 0.003877973 | 0.009732462 | -0.3964067 | -1.74768824 | 41  | D4_G1 |
| GO RETINA_MORPHOGENESIS_IN_CAMERA_TYPE_EYE                      | Development | 0.000639591 | 0.003149377 | -0.3637058 | -1.74898405 | 60  | D4_G1 |
| GO MESENCHYMAL_CELL_DIFFERENTIATION                             | Development | 0.000848896 | 0.003341924 | -0.3062577 | -1.75791172 | 162 | D4_G1 |
| GO OLIGODENDROCYTE_DEVELOPMENT                                  | Development | 0.002632272 | 0.007061749 | -0.3956651 | -1.76195115 | 43  | D4_G1 |
| GO CORPUS_CALLOSUM_DEVELOPMENT                                  | Development | 0.005164622 | 0.012250232 | -0.4418086 | -1.76376506 | 28  | D4_G1 |
| GO NEURAL_CREST_CELL_DIFFERENTIATION                            | Development | 0.000896057 | 0.003416101 | -0.3387564 | -1.76707381 | 92  | D4_G1 |
| GO POST_ANAL_TAIL_MORPHOGENESIS                                 | Development | 0.003835091 | 0.00968734  | -0.4155367 | -1.7766867  | 36  | D4_G1 |
| GO EMBRYONIC_CRANIAL_SKELETON_MORPHOGENESIS                     | Development | 0.00033557  | 0.00287471  | -0.3645171 | -1.77758652 | 64  | D4_G1 |
| GO GLOMERULUS_DEVELOPMENT                                       | Development | 0.000367782 | 0.00287471  | -0.356155  | -1.77885685 | 72  | D4_G1 |
| GO REGULATION_OF_OLIGODENDROCYTE_DIFFERENTIATION                | Development | 0.003074013 | 0.008079669 | -0.4204591 | -1.78339298 | 35  | D4_G1 |
| GO MESONEPHROS_DEVELOPMENT                                      | Development | 0.000488759 | 0.002988033 | -0.3345401 | -1.79061299 | 103 | D4_G1 |
| GO BONE_MORPHOGENESIS                                           | Development | 0.000922084 | 0.003416101 | -0.3418171 | -1.79620892 | 95  | D4_G1 |
| GO REGULATION_OF_KIDNEY_DEVELOPMENT                             | Development | 0.000921376 | 0.003416101 | -0.3790736 | -1.79720147 | 56  | D4_G1 |
| GO MESENCHYME_DEVELOPMENT                                       | Development | 0.001381215 | 0.004468209 | -0.3011815 | -1.7974261  | 215 | D4_G1 |
| GO ASTROCYTE_DIFFERENTIATION                                    | Development | 0.000851305 | 0.003341924 | -0.3938809 | -1.80893802 | 49  | D4_G1 |
| GO EMBRYONIC_FORELIMB_MORPHOGENESIS                             | Development | 0.003267211 | 0.008472968 | -0.4351596 | -1.81149769 | 33  | D4_G1 |
| GO MORPHOGENESIS_OF_AN_EPITHELIAL_SHEET                         | Development | 0.000394633 | 0.00287471  | -0.3571805 | -1.81236796 | 78  | D4_G1 |
| GO REGULATION_OF_CHONDROCYTE_DIFFERENTIATION                    | Development | 0.000851305 | 0.003341924 | -0.3950238 | -1.81418662 | 49  | D4_G1 |
| GO PANCREAS_DEVELOPMENT                                         | Development | 0.00041425  | 0.00287471  | -0.3553846 | -1.81728108 | 82  | D4_G1 |
| GO NEURAL_RETINA_DEVELOPMENT                                    | Development | 0.000339213 | 0.00287471  | -0.3704916 | -1.81919782 | 66  | D4_G1 |
| GO POSITIVE_REGULATION_OF_MESENCHYMAL_CELL_PROLIFERATION        | Development | 0.001863685 | 0.005330687 | -0.4073945 | -1.82551309 | 44  | D4_G1 |
| GO FOREBRAIN_NEURON_DEVELOPMENT                                 | Development | 0.000316356 | 0.00287471  | -0.3818979 | -1.83181132 | 59  | D4_G1 |
| GO OUTFLOW_TRACT_MORPHOGENESIS                                  | Development | 0.000401929 | 0.00287471  | -0.3621351 | -1.83997729 | 79  | D4_G1 |

|                                                      |             |             |             |            |             |     |       |
|------------------------------------------------------|-------------|-------------|-------------|------------|-------------|-----|-------|
| GO_APPENDAGE_DEVELOPMENT                             | Development | 0.001472754 | 0.004620172 | -0.3082932 | -1.84863037 | 223 | D4_G1 |
| GO_LIMB_DEVELOPMENT                                  | Development | 0.001472754 | 0.004620172 | -0.3082932 | -1.84863037 | 223 | D4_G1 |
| GO_MESONEPHRIC_TUBULE_MORPHOGENESIS                  | Development | 0.000325839 | 0.00287471  | -0.3821511 | -1.85258052 | 62  | D4_G1 |
| GO_BRANCHING_INVOLVED_IN_URETERIC_BUD_MORPHOGENESIS  | Development | 0.000307125 | 0.00287471  | -0.391215  | -1.85476431 | 56  | D4_G1 |
| GO_PITUITARY_GLAND_DEVELOPMENT                       | Development | 0.000571265 | 0.00308642  | -0.4018588 | -1.85488902 | 50  | D4_G1 |
| GO_MORPHOGENESIS_OF_A_BRANCHING_STRUCTURE            | Development | 0.001574803 | 0.004688983 | -0.3097647 | -1.86123297 | 229 | D4_G1 |
| GO_THYROID_GLAND_DEVELOPMENT                         | Development | 0.002570143 | 0.006942957 | -0.4745749 | -1.87406783 | 27  | D4_G1 |
| GO_CARDIAC_CHAMBER_MORPHOGENESIS                     | Development | 0.000768049 | 0.003319679 | -0.3349965 | -1.88838571 | 148 | D4_G1 |
| GO_HEART_VALVE_DEVELOPMENT                           | Development | 0.000766088 | 0.003319679 | -0.4324116 | -1.89530911 | 40  | D4_G1 |
| GO_REGULATION_OF_OSTEOBLAST_DIFFERENTIATION          | Development | 0.000653168 | 0.003176029 | -0.3420328 | -1.90047918 | 133 | D4_G1 |
| GO_ARTERY_DEVELOPMENT                                | Development | 0.000617665 | 0.003149377 | -0.3448468 | -1.90692258 | 128 | D4_G1 |
| GO_NEGATIVE_REGULATION_OF_GLIAL_CELL_DIFFERENTIATION | Development | 0.001579066 | 0.004688983 | -0.4651135 | -1.9073994  | 31  | D4_G1 |
| GO_DIGESTIVE_TRACT_MORPHOGENESIS                     | Development | 0.000368189 | 0.00287471  | -0.3806957 | -1.91019497 | 73  | D4_G1 |
| GO_CELL_DIFFERENTIATION_IN_HINDBRAIN                 | Development | 0.000705716 | 0.003307514 | -0.4548483 | -1.91360433 | 34  | D4_G1 |
| GO_NERVE_DEVELOPMENT                                 | Development | 0.000505306 | 0.002988033 | -0.3550214 | -1.9162551  | 108 | D4_G1 |
| GO_LUNG_CELL_DIFFERENTIATION                         | Development | 0.00130662  | 0.004412432 | -0.4774221 | -1.9273674  | 29  | D4_G1 |
| GO_EMBRYONIC_DIGESTIVE_TRACT_DEVELOPMENT             | Development | 0.00052233  | 0.002988033 | -0.4373642 | -1.93613744 | 42  | D4_G1 |
| GO_LUNG_ALVEOLUS_DEVELOPMENT                         | Development | 0.000285633 | 0.00287471  | -0.422048  | -1.94807787 | 50  | D4_G1 |
| GO_REGULATION_OF_CARTILAGE_DEVELOPMENT               | Development | 0.00033557  | 0.00287471  | -0.401502  | -1.95794525 | 64  | D4_G1 |
| GO_METANEPHROS_MORPHOGENESIS                         | Development | 0.001127904 | 0.00398868  | -0.4776204 | -1.95868939 | 31  | D4_G1 |
| GO_CARDIAC_SEPTUM_MORPHOGENESIS                      | Development | 0.000323206 | 0.00287471  | -0.4057619 | -1.96050464 | 61  | D4_G1 |
| GO_BRANCHING_MORPHOGENESIS_OF_AN_EPITHELIAL_TUBE     | Development | 0.001203369 | 0.00417956  | -0.3315128 | -1.96320646 | 203 | D4_G1 |
| GO_LENS_DEVELOPMENT_IN_CAMERA_TYPE_EYE               | Development | 0.000412541 | 0.00287471  | -0.38597   | -1.96684438 | 81  | D4_G1 |
| GO_CARDIAC_VENTRICLE_MORPHOGENESIS                   | Development | 0.000472367 | 0.002988033 | -0.3716569 | -1.96749487 | 98  | D4_G1 |
| GO_COCHLEA_DEVELOPMENT                               | Development | 0.000323206 | 0.00287471  | -0.4072103 | -1.9675027  | 61  | D4_G1 |
| GO_RETINA_DEVELOPMENT_IN_CAMERA_TYPE_EYE             | Development | 0.001038422 | 0.003740241 | -0.3406478 | -1.97865952 | 181 | D4_G1 |
| GO_SKELETAL_MUSCLE_ORGAN_DEVELOPMENT                 | Development | 0.000768049 | 0.003319679 | -0.3527109 | -1.98824243 | 148 | D4_G1 |
| GO_PARASYMPATHETIC_NERVOUS_SYSTEM_DEVELOPMENT        | Development | 0.000229779 | 0.00287471  | -0.4807908 | -1.98865208 | 32  | D4_G1 |
| GO_DIENCEPHALON_DEVELOPMENT                          | Development | 0.0004662   | 0.002988033 | -0.376506  | -1.98909434 | 97  | D4_G1 |
| GO_NOTOCHORD_DEVELOPMENT                             | Development | 0.000538793 | 0.003037544 | -0.4410361 | -1.99004144 | 45  | D4_G1 |
| GO_CAMERA_TYPE_EYE_MORPHOGENESIS                     | Development | 0.000747943 | 0.003319679 | -0.3540383 | -1.99023563 | 145 | D4_G1 |
| GO_REGULATION_OF_MESONEPHROS_DEVELOPMENT             | Development | 0.001038422 | 0.003740241 | -0.5170455 | -1.99233355 | 25  | D4_G1 |
| GO_POSITIVE_REGULATION_OF_STEM_CELL_PROLIFERATION    | Development | 0.000406669 | 0.00287471  | -0.3955672 | -2.01339315 | 80  | D4_G1 |
| GO_PALATE_DEVELOPMENT                                | Development | 0.000598444 | 0.003145875 | -0.3651924 | -2.01369837 | 125 | D4_G1 |
| GO_BONE TRABECULA_MORPHOGENESIS                      | Development | 0.000229779 | 0.00287471  | -0.4887904 | -2.02173989 | 32  | D4_G1 |
| GO_POSITIVE_REGULATION_OF_OSTEOBLAST_DIFFERENTIATION | Development | 0.000339213 | 0.00287471  | -0.4126739 | -2.0263223  | 66  | D4_G1 |
| GO_POSITIVE_REGULATION_OF_KIDNEY_DEVELOPMENT         | Development | 0.000258532 | 0.00287471  | -0.4603144 | -2.02944644 | 41  | D4_G1 |
| GO_GLIAL_CELL_DIFFERENTIATION                        | Development | 0.00094162  | 0.003455566 | -0.3515655 | -2.02947189 | 171 | D4_G1 |
| GO_AORTA_MORPHOGENESIS                               | Development | 0.000283768 | 0.00287471  | -0.4425444 | -2.03243009 | 49  | D4_G1 |
| GO TRABECULA_MORPHOGENESIS                           | Development | 0.000347464 | 0.00287471  | -0.4141122 | -2.03569756 | 67  | D4_G1 |
| GO_KIDNEY_MORPHOGENESIS                              | Development | 0.00044484  | 0.002932927 | -0.3912156 | -2.03645422 | 91  | D4_G1 |
| GO_REGULATION_OF_ASTROCYTE_DIFFERENTIATION           | Development | 0.000255363 | 0.00287471  | -0.4652982 | -2.03945458 | 40  | D4_G1 |
| GO_KIDNEY_EPITHELIUM_DEVELOPMENT                     | Development | 0.00082713  | 0.003341924 | -0.35959   | -2.05049584 | 158 | D4_G1 |
| GO_FORELIMB_MORPHOGENESIS                            | Development | 0.000246975 | 0.00287471  | -0.4725375 | -2.05300144 | 38  | D4_G1 |
| GO_REGULATION_OF_STEM_CELL_PROLIFERATION             | Development | 0.000501505 | 0.002988033 | -0.3818581 | -2.05877122 | 107 | D4_G1 |
| GO_PROXIMAL_DISTAL_PATTERN_FORMATION                 | Development | 0.000233372 | 0.00287471  | -0.499692  | -2.08013519 | 33  | D4_G1 |
| GO_REGULATION_OF_MESENCHYMAL_CELL_PROLIFERATION      | Development | 0.0002918   | 0.00287471  | -0.4469294 | -2.08232734 | 52  | D4_G1 |
| GO_LENS_FIBER_CELL_DIFFERENTIATION                   | Development | 0.000250438 | 0.00287471  | -0.4781448 | -2.08971863 | 39  | D4_G1 |
| GO_POSITIVE_REGULATION_OF_CARTILAGE_DEVELOPMENT      | Development | 0.000225581 | 0.00287471  | -0.5098173 | -2.09072697 | 31  | D4_G1 |
| GO_EYE_MORPHOGENESIS                                 | Development | 0.001158749 | 0.00406084  | -0.3567995 | -2.10062781 | 197 | D4_G1 |
| GO_DIGESTIVE_SYSTEM_DEVELOPMENT                      | Development | 0.001076426 | 0.003841558 | -0.3597715 | -2.10470295 | 189 | D4_G1 |
| GO_ENDOCRINE_SYSTEM_DEVELOPMENT                      | Development | 0.000630517 | 0.003149377 | -0.3809927 | -2.10752486 | 129 | D4_G1 |

|                                                                      |             |             |             |            |             |     |       |
|----------------------------------------------------------------------|-------------|-------------|-------------|------------|-------------|-----|-------|
| GO CENTRAL_NERVOUS_SYSTEM_NEURON_DEVELOPMENT                         | Development | 0.000585823 | 0.003121715 | -0.3867654 | -2.13000916 | 124 | D4_G1 |
| GO SPINAL_CORD_PATTERNING                                            | Development | 0.000442576 | 0.002932927 | -0.5267593 | -2.1456301  | 30  | D4_G1 |
| GO INNER_EAR_MORPHOGENESIS                                           | Development | 0.000763942 | 0.003319679 | -0.3790919 | -2.14744203 | 149 | D4_G1 |
| GO NEPHRON_EPITHELIUM_DEVELOPMENT                                    | Development | 0.000517866 | 0.002988033 | -0.3964073 | -2.15422876 | 111 | D4_G1 |
| GO CRANIAL_NERVE_DEVELOPMENT                                         | Development | 0.000394633 | 0.00287471  | -0.4264439 | -2.16381717 | 78  | D4_G1 |
| GO CARTILAGE_DEVELOPMENT_INVOLVED_IN_ENDOCHONDRAL_BONE_MORPHOGENESIS | Development | 0.000214179 | 0.00287471  | -0.548728  | -2.16689418 | 27  | D4_G1 |
| GO ANTERIOR_POSTERIOR_PATTERN_SPECIFICATION                          | Development | 0.001547988 | 0.004688983 | -0.3603646 | -2.16691398 | 28  | D4_G1 |
| GO ENDOCHONDRAL_BONE_MORPHOGENESIS                                   | Development | 0.000307125 | 0.00287471  | -0.4585437 | -2.17397195 | 56  | D4_G1 |
| GO LUNG_EPITHELIUM_DEVELOPMENT                                       | Development | 0.000246975 | 0.00287471  | -0.5006035 | -2.17493784 | 38  | D4_G1 |
| GO SKELETAL_MUSCLE_CELL_DIFFERENTIATION                              | Development | 0.000312793 | 0.00287471  | -0.4546943 | -2.17550915 | 58  | D4_G1 |
| GO EMBRYONIC_CAMERA_TYPE_EYE_MORPHOGENESIS                           | Development | 0.000255363 | 0.00287471  | -0.4973989 | -2.18015583 | 40  | D4_G1 |
| GO LENS_MORPHOGENESIS_IN_CAMERA_TYPE_EYE                             | Development | 0.000235239 | 0.00287471  | -0.5188999 | -2.1830773  | 34  | D4_G1 |
| GO ARTERY_MORPHOGENESIS                                              | Development | 0.000412541 | 0.00287471  | -0.4294175 | -2.18824581 | 81  | D4_G1 |
| GO NEPHRON_DEVELOPMENT                                               | Development | 0.000780031 | 0.003334419 | -0.3872835 | -2.19841789 | 151 | D4_G1 |
| GO SMOOTH_MUSCLE_TISSUE_DEVELOPMENT                                  | Development | 0.000250438 | 0.00287471  | -0.5041699 | -2.20346047 | 39  | D4_G1 |
| GO DORSAL_VENTRAL_PATTERN_FORMATION                                  | Development | 0.000549451 | 0.003053375 | -0.4051565 | -2.21049014 | 116 | D4_G1 |
| GO CELL_FATE_SPECIFICATION                                           | Development | 0.000412541 | 0.00287471  | -0.4345385 | -2.21434205 | 81  | D4_G1 |
| GO SKELETAL_SYSTEM_MORPHOGENESIS                                     | Development | 0.001424501 | 0.004542058 | -0.3742766 | -2.23625611 | 218 | D4_G1 |
| GO EMBRYONIC_EYE_MORPHOGENESIS                                       | Development | 0.000285633 | 0.00287471  | -0.4901145 | -2.26225741 | 50  | D4_G1 |
| GO CRANIAL_NERVE_MORPHOGENESIS                                       | Development | 0.000280741 | 0.00287471  | -0.5005466 | -2.28514076 | 48  | D4_G1 |
| GO EAR_MORPHOGENESIS                                                 | Development | 0.000912409 | 0.003416101 | -0.3968674 | -2.28728296 | 169 | D4_G1 |
| GO SYMPATHETIC_NERVOUS_SYSTEM_DEVELOPMENT                            | Development | 0.000239693 | 0.00287471  | -0.5418744 | -2.31686195 | 36  | D4_G1 |
| GO METANEPHRIC_NEPHRON_DEVELOPMENT                                   | Development | 0.000225581 | 0.00287471  | -0.5708976 | -2.34121321 | 31  | D4_G1 |
| GO VENTRICULAR_SEPTUM_MORPHOGENESIS                                  | Development | 0.000246975 | 0.00287471  | -0.5393887 | -2.34344547 | 38  | D4_G1 |
| GO CONNECTIVE_TISSUE_DEVELOPMENT                                     | Development | 0.001315789 | 0.004412432 | -0.3965337 | -2.36130187 | 211 | D4_G1 |
| GO CELL_FATE_COMMITMENT                                              | Development | 0.001574803 | 0.004688983 | -0.3936752 | -2.36541193 | 229 | D4_G1 |
| GO POSITIVE_REGULATION_OF_BIOMINERAL_TISSUE_DEVELOPMENT              | Development | 0.000235239 | 0.00287471  | -0.5648245 | -2.37628772 | 34  | D4_G1 |
| GO SPINAL_CORD_MOTOR_NEURON_DIFFERENTIATION                          | Development | 0.000269397 | 0.00287471  | -0.5329133 | -2.40460902 | 45  | D4_G1 |
| GO CHONDROCYTE_DIFFERENTIATION                                       | Development | 0.000385505 | 0.00287471  | -0.4785623 | -2.41423657 | 76  | D4_G1 |
| GO METANEPHROS_DEVELOPMENT                                           | Development | 0.00042123  | 0.00287471  | -0.4732913 | -2.43736923 | 85  | D4_G1 |
| GO CHONDROCYTE_DEVELOPMENT                                           | Development | 0.000244141 | 0.00287471  | -0.5680776 | -2.44760309 | 37  | D4_G1 |
| GO OTIC_VESICLE_DEVELOPMENT                                          | Development | 0.000235239 | 0.00287471  | -0.585213  | -2.46206472 | 34  | D4_G1 |
| GO CARTILAGE_DEVELOPMENT                                             | Development | 0.000803213 | 0.003340031 | -0.4345368 | -2.47551523 | 155 | D4_G1 |
| GO OLIGODENDROCYTE_DIFFERENTIATION                                   | Development | 0.000401929 | 0.00287471  | -0.4958826 | -2.51953698 | 79  | D4_G1 |
| GO VENTRAL_SPINAL_CORD_DEVELOPMENT                                   | Development | 0.000323206 | 0.00287471  | -0.5369827 | -2.59451924 | 61  | D4_G1 |
| GO SPINAL_CORD_DEVELOPMENT                                           | Development | 0.000693963 | 0.003292091 | -0.4649154 | -2.59981849 | 138 | D4_G1 |
| GO RENAL_TUBULE_DEVELOPMENT                                          | Development | 0.000516529 | 0.002988033 | -0.4824414 | -2.60723623 | 109 | D4_G1 |
| GO EMBRYONIC_SKELETAL_SYSTEM_MORPHOGENESIS                           | Development | 0.000569801 | 0.00308642  | -0.4814597 | -2.637356   | 120 | D4_G1 |
| GO MIDDLE_EAR_MORPHOGENESIS                                          | Development | 0.000210748 | 0.00287471  | -0.6781318 | -2.64803923 | 26  | D4_G1 |
| GO AUTONOMIC_NERVOUS_SYSTEM_DEVELOPMENT                              | Development | 0.000312793 | 0.00287471  | -0.5590963 | -2.67502581 | 58  | D4_G1 |
| GO EMBRYONIC_SKELETAL_SYSTEM_DEVELOPMENT                             | Development | 0.000793651 | 0.003340031 | -0.4837971 | -2.75252443 | 154 | D4_G1 |
| GO CELL_DIFFERENTIATION_IN_SPINAL_CORD                               | Development | 0.000360101 | 0.00287471  | -0.5600251 | -2.76646843 | 69  | D4_G1 |
| GO NEURON_FATE_SPECIFICATION                                         | Development | 0.000236463 | 0.00287471  | -0.668053  | -2.83357163 | 35  | D4_G1 |
| GO NEURON_FATE_COMMITMENT                                            | Development | 0.000388651 | 0.00287471  | -0.5868016 | -2.96682878 | 77  | D4_G1 |
| GO ENDODERM_DEVELOPMENT                                              | Development | 0.000116333 | 0.00076617  | 0.64534528 | 2.814554855 | 92  | D4_G2 |
| GO SPECIFICATION_OF_SYMMETRY                                         | Development | 0.000117178 | 0.00076617  | 0.54387093 | 2.594021059 | 159 | D4_G2 |
| GO GASTRULATION                                                      | Development | 0.000116918 | 0.00076617  | 0.52149005 | 2.559571627 | 195 | D4_G2 |
| GO MESONEPHROS_DEVELOPMENT                                           | Development | 0.000115808 | 0.00076617  | 0.57349993 | 2.553109966 | 103 | D4_G2 |
| GO REGULATION_OF_HEART_MORPHOGENESIS                                 | Development | 0.00011655  | 0.00076617  | 0.70233218 | 2.551354751 | 37  | D4_G2 |
| GO ENDODERMAL_CELL_DIFFERENTIATION                                   | Development | 0.000116469 | 0.00076617  | 0.62629373 | 2.505575624 | 58  | D4_G2 |
| GO BRANCHING_INVOLVED_IN_SALIVARY_GLAND_MORPHOGENESIS                | Development | 0.000116618 | 0.00076617  | 0.72982423 | 2.440393428 | 26  | D4_G2 |
| GO POSITIVE_REGULATION_OF_EPITHELIAL_TO_MESENCHYMAL_TRANSITION       | Development | 0.000115848 | 0.00076617  | 0.6133478  | 2.4388442   | 56  | D4_G2 |

|                                                                     |             |             |             |            |             |     |       |
|---------------------------------------------------------------------|-------------|-------------|-------------|------------|-------------|-----|-------|
| GO_ANTERIOR_POSTERIOR_AXIS_SPECIFICATION                            | Development | 0.000116469 | 0.00076617  | 0.60878964 | 2.435548062 | 58  | D4_G2 |
| GO_EXOCRINE_SYSTEM_DEVELOPMENT                                      | Development | 0.000116469 | 0.00076617  | 0.60678307 | 2.427520468 | 58  | D4_G2 |
| GO_MESENCHYMAL_CELL_DIFFERENTIATION                                 | Development | 0.000117096 | 0.00076617  | 0.50545143 | 2.415527773 | 162 | D4_G2 |
| GO_MESENCHYME_DEVELOPMENT                                           | Development | 0.000116932 | 0.00076617  | 0.48451779 | 2.411144982 | 215 | D4_G2 |
| GO_SALIVARY_GLAND_DEVELOPMENT                                       | Development | 0.000115861 | 0.00076617  | 0.63013531 | 2.401670022 | 46  | D4_G2 |
| GO_MORPHOGENESIS_OF_A_BRANCHING_STRUCTURE                           | Development | 0.000117467 | 0.00076617  | 0.4757903  | 2.387272403 | 229 | D4_G2 |
| GO_STEM_CELL_DIFFERENTIATION                                        | Development | 0.000116959 | 0.00076617  | 0.47204456 | 2.36315776  | 224 | D4_G2 |
| GO_MESONEPHRIC_TUBULE_MORPHOGENESIS                                 | Development | 0.000115473 | 0.00076617  | 0.58129045 | 2.361856936 | 62  | D4_G2 |
| GO_REGULATION_OF_EPITHELIAL_TO_MESENCHYMAL_TRANSITION               | Development | 0.000115567 | 0.00076617  | 0.51659566 | 2.359071098 | 120 | D4_G2 |
| GO_EPITHELIAL_TO_MESENCHYMAL_TRANSITION                             | Development | 0.000115035 | 0.00076617  | 0.56062922 | 2.358517422 | 74  | D4_G2 |
| GO_REGULATION_OF_STEM_CELL_DIFFERENTIATION                          | Development | 0.000116809 | 0.00076617  | 0.48582467 | 2.348309936 | 174 | D4_G2 |
| GO_REGULATION_OF_KIDNEY_DEVELOPMENT                                 | Development | 0.000231696 | 0.001052062 | 0.58851511 | 2.340102398 | 56  | D4_G2 |
| GO_EMBRYONIC_HEART_TUBE_DEVELOPMENT                                 | Development | 0.000115554 | 0.00076617  | 0.54017676 | 2.328822003 | 86  | D4_G2 |
| GO_CARDIAC_EPITHELIAL_TO_MESENCHYMAL_TRANSITION                     | Development | 0.000118175 | 0.00076617  | 0.67731423 | 2.315946212 | 29  | D4_G2 |
| GO_NEPHRON_DEVELOPMENT                                              | Development | 0.000117014 | 0.00076617  | 0.48209791 | 2.279893971 | 151 | D4_G2 |
| GO_CARDIAC_MUSCLE_TISSUE_MORPHOGENESIS                              | Development | 0.00011562  | 0.00076617  | 0.53172847 | 2.272847221 | 82  | D4_G2 |
| GO_POSITIVE_REGULATION_OF_STEM_CELL_DIFFERENTIATION                 | Development | 0.000115861 | 0.00076617  | 0.5424494  | 2.26268499  | 71  | D4_G2 |
| GO_AXIS_SPECIFICATION                                               | Development | 0.000115754 | 0.00076617  | 0.50030153 | 2.238027237 | 106 | D4_G2 |
| GO_BRANCHING_MORPHOGENESIS_OF_AN_EPITHELIAL_TUBE                    | Development | 0.000116469 | 0.00076617  | 0.45226926 | 2.233680106 | 203 | D4_G2 |
| GO_POSITIVE_REGULATION_OF_KIDNEY_DEVELOPMENT                        | Development | 0.000116252 | 0.00076617  | 0.60101089 | 2.231877536 | 41  | D4_G2 |
| GO_CARDIAC_CHAMBER_MORPHOGENESIS                                    | Development | 0.000116932 | 0.00076617  | 0.47299831 | 2.230701236 | 148 | D4_G2 |
| GO_KIDNEY_MORPHOGENESIS                                             | Development | 0.000115982 | 0.00076617  | 0.51168052 | 2.23051208  | 91  | D4_G2 |
| GO_BODY_MORPHOGENESIS                                               | Development | 0.000115687 | 0.00076617  | 0.53493208 | 2.226352885 | 70  | D4_G2 |
| GO_GLOMERULUS_DEVELOPMENT                                           | Development | 0.000115754 | 0.00076617  | 0.53028128 | 2.218665754 | 72  | D4_G2 |
| GO_HEAD_MORPHOGENESIS                                               | Development | 0.000231214 | 0.001052062 | 0.54716215 | 2.207585475 | 60  | D4_G2 |
| GO_MESENCHYME_MORPHOGENESIS                                         | Development | 0.00023291  | 0.001052062 | 0.57288884 | 2.193556105 | 47  | D4_G2 |
| GO_EMBRYONIC_HEART_TUBE_MORPHOGENESIS                               | Development | 0.000115393 | 0.00076617  | 0.5182787  | 2.193499148 | 77  | D4_G2 |
| GO_KIDNEY_EPITHELIUM_DEVELOPMENT                                    | Development | 0.000117151 | 0.00076617  | 0.45922484 | 2.187896346 | 158 | D4_G2 |
| GO_METANEPHROS_DEVELOPMENT                                          | Development | 0.000115433 | 0.00076617  | 0.50625384 | 2.177556612 | 85  | D4_G2 |
| GO_REGULATION_OF_MORPHOGENESIS_OF_A_BRANCHING_STRUCTURE             | Development | 0.000232477 | 0.001052062 | 0.55389213 | 2.176572037 | 53  | D4_G2 |
| GO_BIOMINERAL_TISSUE_DEVELOPMENT                                    | Development | 0.000115754 | 0.00076617  | 0.51810781 | 2.16773268  | 72  | D4_G2 |
| GO_NEGATIVE_REGULATION_OF_STEM_CELL_DIFFERENTIATION                 | Development | 0.000231374 | 0.001052062 | 0.52012467 | 2.164725405 | 70  | D4_G2 |
| GO_EPIDERMIS_MORPHOGENESIS                                          | Development | 0.000117994 | 0.00076617  | 0.62413872 | 2.164685875 | 31  | D4_G2 |
| GO_NEGATIVE_REGULATION_OF_EPITHELIAL_TO_MESENCHYMAL_TRANSITION      | Development | 0.000115433 | 0.00076617  | 0.57275308 | 2.162985138 | 44  | D4_G2 |
| GO_POSITIVE_REGULATION_OF_EMBRYONIC_DEVELOPMENT                     | Development | 0.000116469 | 0.00076617  | 0.58477801 | 2.150248184 | 39  | D4_G2 |
| GO_EMBRYONIC_PATTERN_SPECIFICATION                                  | Development | 0.000230574 | 0.001052062 | 0.50267693 | 2.147043474 | 81  | D4_G2 |
| GO_SKIN_EPIDERMIS_DEVELOPMENT                                       | Development | 0.000115128 | 0.00076617  | 0.5069737  | 2.143465422 | 76  | D4_G2 |
| GO_SMOOTH_MUSCLE_CELL_DIFFERENTIATION                               | Development | 0.000233182 | 0.001052062 | 0.58305752 | 2.13128507  | 38  | D4_G2 |
| GO_REGULATION_OF_EMBRYONIC_DEVELOPMENT                              | Development | 0.000116877 | 0.00076617  | 0.44835988 | 2.123797432 | 152 | D4_G2 |
| GO_NEGATIVE_REGULATION_OF_VASCULATURE_DEVELOPMENT                   | Development | 0.000232666 | 0.001052062 | 0.48006513 | 2.093715855 | 92  | D4_G2 |
| GO_OTIC_VESICLE_DEVELOPMENT                                         | Development | 0.00046811  | 0.001820948 | 0.58878782 | 2.089615536 | 34  | D4_G2 |
| GO_RETINA_VASCULATURE_DEVELOPMENT_IN_CAMERA_TYPE_EYE                | Development | 0.00034965  | 0.001397836 | 0.57499447 | 2.088776386 | 37  | D4_G2 |
| GO_DIGESTIVE_SYSTEM_DEVELOPMENT                                     | Development | 0.000116891 | 0.00076617  | 0.42476721 | 2.076860949 | 189 | D4_G2 |
| GO_MESODERM_MORPHOGENESIS                                           | Development | 0.00023175  | 0.001052062 | 0.47382452 | 2.071599328 | 93  | D4_G2 |
| GO_RENAL_TUBULE_DEVELOPMENT                                         | Development | 0.000115942 | 0.00076617  | 0.45911073 | 2.064750157 | 109 | D4_G2 |
| GO_PATTERNING_OF_BLOOD_VESSELS                                      | Development | 0.000230574 | 0.001052062 | 0.49882547 | 2.061306408 | 67  | D4_G2 |
| GO_MESODERM_DEVELOPMENT                                             | Development | 0.000116036 | 0.00076617  | 0.43902854 | 2.052886724 | 139 | D4_G2 |
| GO_REGULATION_OF_GASTRULATION                                       | Development | 0.000232477 | 0.001052062 | 0.52198002 | 2.051170357 | 53  | D4_G2 |
| GO_LEFT_RIGHT_PATTERN_FORMATION                                     | Development | 0.000235294 | 0.001052062 | 0.60858125 | 2.048663266 | 27  | D4_G2 |
| GO_CARDIOCYTE_DIFFERENTIATION                                       | Development | 0.000115194 | 0.00076617  | 0.44449647 | 2.047188501 | 126 | D4_G2 |
| GO_CELL_FATE_COMMITMENT_INVOLVED_IN_FORMATION_OF_PRIMARY_GERM_LAYER | Development | 0.00058713  | 0.002095354 | 0.58495621 | 2.046580155 | 32  | D4_G2 |
| GO_CARDIAC_MUSCLE_TISSUE_DEVELOPMENT                                | Development | 0.000116891 | 0.00076617  | 0.41819982 | 2.0443369   | 188 | D4_G2 |

|                                                                   |             |             |             |            |             |     |       |
|-------------------------------------------------------------------|-------------|-------------|-------------|------------|-------------|-----|-------|
| GO_GLAND_MORPHOGENESIS                                            | Development | 0.000115647 | 0.00076617  | 0.44365876 | 2.044293437 | 127 | D4_G2 |
| GO_MUSCLE_CELL_DEVELOPMENT                                        | Development | 0.000116063 | 0.00076617  | 0.4378379  | 2.042317348 | 137 | D4_G2 |
| GO_NEPHRON_EPITHELIUM_DEVELOPMENT                                 | Development | 0.00016077  | 0.00076617  | 0.45111358 | 2.034699976 | 111 | D4_G2 |
| GO_MESODERMAL_CELL_DIFFERENTIATION                                | Development | 0.000582954 | 0.002095354 | 0.55604768 | 2.032554387 | 38  | D4_G2 |
| GO_METANEPHRIC_NEPHRON_DEVELOPMENT                                | Development | 0.000707965 | 0.002394767 | 0.58488653 | 2.028548433 | 31  | D4_G2 |
| GO_NOTOCHORD_DEVELOPMENT                                          | Development | 0.000347262 | 0.001397836 | 0.53377929 | 2.023986003 | 45  | D4_G2 |
| GO_REGULATION_OF_CARTILAGE_DEVELOPMENT                            | Development | 0.000230256 | 0.001052062 | 0.49316612 | 2.020180497 | 64  | D4_G2 |
| GO_CONNECTIVE_TISSUE_DEVELOPMENT                                  | Development | 0.000116469 | 0.00076617  | 0.40665189 | 2.019901939 | 211 | D4_G2 |
| GO_SMOOTH_MUSCLE_TISSUE_DEVELOPMENT                               | Development | 0.000582343 | 0.002095354 | 0.54825623 | 2.015956382 | 39  | D4_G2 |
| GO_CARDIAC_CHAMBER_DEVELOPMENT                                    | Development | 0.00011711  | 0.00076617  | 0.40501944 | 2.013038359 | 213 | D4_G2 |
| GO_CARDIAC_VENTRICLE_DEVELOPMENT                                  | Development | 0.000116768 | 0.00076617  | 0.42233117 | 2.009421479 | 156 | D4_G2 |
| GO_DEVELOPMENTAL_INDUCATION                                       | Development | 0.000707965 | 0.002394767 | 0.57835116 | 2.005881968 | 31  | D4_G2 |
| GO_BRANCHING_INVOLVED_IN_URETERIC_BUD_MORPHOGENESIS               | Development | 0.000231696 | 0.001052062 | 0.50384517 | 2.003430791 | 56  | D4_G2 |
| GO_NEURAL_CRESCENT_CELL_DIFFERENTIATION                           | Development | 0.000232666 | 0.001052062 | 0.45935094 | 2.003374713 | 92  | D4_G2 |
| GO_MUSCLE_ORGAN_MORPHOGENESIS                                     | Development | 0.000116023 | 0.00076617  | 0.45135544 | 1.998370492 | 100 | D4_G2 |
| GO_GENITALIA_DEVELOPMENT                                          | Development | 0.000348959 | 0.001397836 | 0.50965231 | 1.99324619  | 52  | D4_G2 |
| GO_VENTRICULAR_SYSTEM_DEVELOPMENT                                 | Development | 0.000232883 | 0.001052062 | 0.51675102 | 1.988113003 | 48  | D4_G2 |
| GO_CARDIAC_VENTRICLE_MORPHOGENESIS                                | Development | 0.000231669 | 0.001052062 | 0.45004372 | 1.987559859 | 98  | D4_G2 |
| GO_POSITIVE_REGULATION_OF_VASCULATURE_DEVELOPMENT                 | Development | 0.000230388 | 0.001052062 | 0.43070108 | 1.983651993 | 126 | D4_G2 |
| GO_OSTEOBLAST_DIFFERENTIATION                                     | Development | 0.00011655  | 0.00076617  | 0.40690077 | 1.973049259 | 177 | D4_G2 |
| GO_CORONARY_VASCULATURE_DEVELOPMENT                               | Development | 0.000230867 | 0.001052062 | 0.46254186 | 1.961935043 | 78  | D4_G2 |
| GO_EPITHELIAL_CELL_DIFFERENTIATION_INVOLVED_IN_KIDNEY_DEVELOPMENT | Development | 0.000939408 | 0.003070838 | 0.56008647 | 1.959568624 | 32  | D4_G2 |
| GO_NEGATIVE_REGULATION_OF_EMBRYONIC_DEVELOPMENT                   | Development | 0.00034823  | 0.001397836 | 0.50093274 | 1.952179296 | 51  | D4_G2 |
| GO_OUTFLOW_TRACT_MORPHOGENESIS                                    | Development | 0.000231481 | 0.001052062 | 0.4570731  | 1.940759481 | 79  | D4_G2 |
| GO_BRAIN_MORPHOGENESIS                                            | Development | 0.000813764 | 0.002687663 | 0.52127919 | 1.935790755 | 41  | D4_G2 |
| GO_MYOTUBE_DIFFERENTIATION                                        | Development | 0.0003465   | 0.001397836 | 0.47368354 | 1.931529    | 63  | D4_G2 |
| GO_EMBRYONIC_DIGESTIVE_TRACT_DEVELOPMENT                          | Development | 0.000694686 | 0.002394767 | 0.5163121  | 1.92890822  | 42  | D4_G2 |
| GO_REGULATION_OF_MESONEPHROS_DEVELOPMENT                          | Development | 0.001645123 | 0.005003749 | 0.58152818 | 1.923978556 | 25  | D4_G2 |
| GO_VENTRICULAR_CARDIAC_MUSCLE_TISSUE_DEVELOPMENT                  | Development | 0.000347262 | 0.001397836 | 0.45972996 | 1.923483183 | 72  | D4_G2 |
| GO_DORSAL_VENTRAL_PATTERN_FORMATION                               | Development | 0.000233046 | 0.001052062 | 0.42352159 | 1.92275497  | 116 | D4_G2 |
| GO_DOPAMINERGIC_NEURON_DIFFERENTIATION                            | Development | 0.001399091 | 0.004319415 | 0.52582816 | 1.922091154 | 38  | D4_G2 |
| GO_ARTERY_DEVELOPMENT                                             | Development | 0.00023218  | 0.001052062 | 0.41614831 | 1.919388822 | 128 | D4_G2 |
| GO_ENDOCARDIAL_CUSHION_DEVELOPMENT                                | Development | 0.000694525 | 0.002394767 | 0.50391385 | 1.910742139 | 45  | D4_G2 |
| GO_DIGESTIVE_TRACT_MORPHOGENESIS                                  | Development | 0.000345861 | 0.001397836 | 0.45522001 | 1.90956751  | 73  | D4_G2 |
| GO_ARTERY_MORPHOGENESIS                                           | Development | 0.000230574 | 0.001052062 | 0.44459865 | 1.898978394 | 81  | D4_G2 |
| GO_CARTILAGE_DEVELOPMENT                                          | Development | 0.000116973 | 0.00076617  | 0.39823099 | 1.89235985  | 155 | D4_G2 |
| GO_CELL_FATE_COMMITMENT                                           | Development | 0.000117467 | 0.00076617  | 0.37701669 | 1.891676958 | 229 | D4_G2 |
| GO_BONE_DEVELOPMENT                                               | Development | 0.000116768 | 0.00076617  | 0.38260262 | 1.891643165 | 205 | D4_G2 |
| GO_GASTRULATION_WITH_MOUTH_FORMING_SECOND                         | Development | 0.001864802 | 0.005413492 | 0.52163511 | 1.879532831 | 36  | D4_G2 |
| GO_PANCREAS_DEVELOPMENT                                           | Development | 0.000462481 | 0.001817224 | 0.43962279 | 1.879145985 | 82  | D4_G2 |
| GO_FACE_DEVELOPMENT                                               | Development | 0.000230574 | 0.001052062 | 0.43960872 | 1.877665308 | 81  | D4_G2 |
| GO_HEART_VALVE_DEVELOPMENT                                        | Development | 0.001978124 | 0.005699928 | 0.50750117 | 1.873469644 | 40  | D4_G2 |
| GO_METANEPHROS_MORPHOGENESIS                                      | Development | 0.0020059   | 0.005737463 | 0.53918168 | 1.870031357 | 31  | D4_G2 |
| GO_APOPTOTIC_PROCESS_INVOLVED_IN_DEVELOPMENT                      | Development | 0.002223523 | 0.006313506 | 0.52577808 | 1.865993157 | 34  | D4_G2 |
| GO_REGULATION_OF_BIOMINERAL_TISSUE_DEVELOPMENT                    | Development | 0.000815281 | 0.002687663 | 0.46464663 | 1.858883774 | 58  | D4_G2 |
| GO_STRIATED_MUSCLE_CELL_DIFFERENTIATION                           | Development | 0.000116973 | 0.00076617  | 0.37537039 | 1.844240673 | 197 | D4_G2 |
| GO_NEGATIVE_REGULATION_OF_MUSCLE_TISSUE_DEVELOPMENT               | Development | 0.001850781 | 0.005413492 | 0.49060313 | 1.842554592 | 43  | D4_G2 |
| GO_LUNG_MORPHOGENESIS                                             | Development | 0.001048218 | 0.003397973 | 0.45965915 | 1.838930699 | 58  | D4_G2 |
| GO_CELL_DIFFERENTIATION_INVOLVED_IN_KIDNEY_DEVELOPMENT            | Development | 0.001397299 | 0.004319415 | 0.47524822 | 1.828437926 | 48  | D4_G2 |
| GO TRABECULA MORPHOGENESIS                                        | Development | 0.000691722 | 0.002394767 | 0.4416092  | 1.824870499 | 67  | D4_G2 |
| GO_DIENCEPHALON_DEVELOPMENT                                       | Development | 0.000577968 | 0.002095354 | 0.41359418 | 1.823992268 | 97  | D4_G2 |
| GO_ENDOCRINE_SYSTEM_DEVELOPMENT                                   | Development | 0.000231884 | 0.001052062 | 0.39371363 | 1.818449455 | 129 | D4_G2 |

|                                                                          |             |             |             |            |             |     |       |
|--------------------------------------------------------------------------|-------------|-------------|-------------|------------|-------------|-----|-------|
| GO_REGULATION_OF_METANEPHROS_DEVELOPMENT                                 | Development | 0.005052879 | 0.013017019 | 0.54914105 | 1.816826155 | 25  | D4_G2 |
| GO_DEVELOPMENTAL_GROWTH_INVOLVED_IN_MORPHOGENESIS                        | Development | 0.000348878 | 0.001397836 | 0.38880428 | 1.815303184 | 138 | D4_G2 |
| GO_PROSTATE_GLAND_MORPHOGENESIS                                          | Development | 0.003781165 | 0.010074474 | 0.53511665 | 1.814803505 | 28  | D4_G2 |
| GO_CELL_FATE_SPECIFICATION                                               | Development | 0.000576435 | 0.002095354 | 0.42452233 | 1.81322801  | 81  | D4_G2 |
| GO_BONE_MORPHOGENESIS                                                    | Development | 0.000231777 | 0.001052062 | 0.41230751 | 1.809879635 | 95  | D4_G2 |
| GO_LUNG_ALVEOLUS_DEVELOPMENT                                             | Development | 0.001860249 | 0.005413492 | 0.46601296 | 1.809264032 | 50  | D4_G2 |
| GO_NEGATIVE_REGULATION_OF_CELL_MORPHOGENESIS_INVOLVED_IN_DIFFERENTIATION | Development | 0.000116604 | 0.00076617  | 0.37268114 | 1.804304876 | 175 | D4_G2 |
| GO_EPITHELIAL_TUBE_BRANCHING_INVOLVED_IN_LUNG_MORPHOGENESIS              | Development | 0.003638498 | 0.009761211 | 0.51225151 | 1.803568822 | 33  | D4_G2 |
| GO_CARDIAC_MUSCLE_CELL_DIFFERENTIATION                                   | Development | 0.000577968 | 0.002095354 | 0.40697627 | 1.794806631 | 97  | D4_G2 |
| GO_APPENDAGE_DEVELOPMENT                                                 | Development | 0.000117316 | 0.00076617  | 0.35807935 | 1.790589338 | 223 | D4_G2 |
| GO_LIMB_DEVELOPMENT                                                      | Development | 0.000117316 | 0.00076617  | 0.35807935 | 1.790589338 | 223 | D4_G2 |
| GO_EAR_MORPHOGENESIS                                                     | Development | 0.000233481 | 0.001052062 | 0.37160112 | 1.787868895 | 169 | D4_G2 |
| GO_EMBRYONIC_CRANIAL_SKELETON_MORPHOGENESIS                              | Development | 0.001726917 | 0.005207525 | 0.43328377 | 1.774881495 | 64  | D4_G2 |
| GO_REGULATION_OF_CARDIAC_MUSCLE_TISSUE_DEVELOPMENT                       | Development | 0.002439591 | 0.006876818 | 0.44755468 | 1.764631471 | 54  | D4_G2 |
| GO_CARDIAC_CELL_DEVELOPMENT                                              | Development | 0.001848002 | 0.005413492 | 0.42956445 | 1.751625541 | 63  | D4_G2 |
| GO_CARTILAGE_DEVELOPMENT_INVOLVED_IN_ENDOCHONDRAL_BONE_MORPHOGENESIS     | Development | 0.007529412 | 0.017859397 | 0.52032402 | 1.751563528 | 27  | D4_G2 |
| GO_CRANIAL_SKELETAL_SYSTEM_DEVELOPMENT                                   | Development | 0.001266989 | 0.004034866 | 0.41411686 | 1.746266875 | 75  | D4_G2 |
| GO_SOMITE_DEVELOPMENT                                                    | Development | 0.000578905 | 0.002095354 | 0.38898695 | 1.742843932 | 107 | D4_G2 |
| GO_THYROID_GLAND_DEVELOPMENT                                             | Development | 0.009176471 | 0.020875129 | 0.51182283 | 1.722946001 | 27  | D4_G2 |
| GO_AORTA_DEVELOPMENT                                                     | Development | 0.001275806 | 0.004034866 | 0.39496517 | 1.721727832 | 91  | D4_G2 |
| GO_ENDOTHELIUM_DEVELOPMENT                                               | Development | 0.000811971 | 0.002687663 | 0.37841148 | 1.716450364 | 115 | D4_G2 |
| GO_LATERAL_VENTRICLE_DEVELOPMENT                                         | Development | 0.007750117 | 0.017974384 | 0.48949016 | 1.712574067 | 32  | D4_G2 |
| GO_PARASYMPATHETIC_NERVOUS_SYSTEM_DEVELOPMENT                            | Development | 0.007750117 | 0.017974384 | 0.48944753 | 1.712424925 | 32  | D4_G2 |
| GO_INNER_EAR_MORPHOGENESIS                                               | Development | 0.000585138 | 0.002095354 | 0.36238797 | 1.710585301 | 149 | D4_G2 |
| GO_DENDRITIC_CELL_DIFFERENTIATION                                        | Development | 0.011163337 | 0.024610177 | 0.51640591 | 1.708522374 | 25  | D4_G2 |
| GO_HEART TRABECULA_MORPHOGENESIS                                         | Development | 0.009085546 | 0.020789866 | 0.49250139 | 1.708131165 | 31  | D4_G2 |
| GO_POSITIVE_REGULATION_OF_BIOMINERAL_TISSUE_DEVELOPMENT                  | Development | 0.008074898 | 0.018586599 | 0.47960136 | 1.702111398 | 34  | D4_G2 |
| GO_ANTERIOR_POSTERIOR_PATTERN_SPECIFICATION                              | Development | 0.000351947 | 0.001397836 | 0.33737073 | 1.691866172 | 228 | D4_G2 |
| GO_POSITIVE_REGULATION_OF_MESENCHYMAL_CELL_PROLIFERATION                 | Development | 0.005771673 | 0.014210004 | 0.44788248 | 1.691414998 | 44  | D4_G2 |
| GO_HEPATICOBILIARY_SYSTEM_DEVELOPMENT                                    | Development | 0.000585069 | 0.002095354 | 0.35753421 | 1.690818551 | 151 | D4_G2 |
| GO_EMBRYONIC_SKELETAL_SYSTEM_DEVELOPMENT                                 | Development | 0.000701754 | 0.002394767 | 0.35582283 | 1.688706251 | 154 | D4_G2 |
| GO_POSITIVE_REGULATION_OF_EPITHELIAL_CELL_DIFFERENTIATION                | Development | 0.004076403 | 0.010787217 | 0.4207695  | 1.683347205 | 58  | D4_G2 |
| GO_KERATINOCYTE_DIFFERENTIATION                                          | Development | 0.002532811 | 0.007088228 | 0.39758999 | 1.680995273 | 76  | D4_G2 |
| GO_PROSTATE_GLAND_DEVELOPMENT                                            | Development | 0.006372379 | 0.015301576 | 0.43948906 | 1.675049272 | 46  | D4_G2 |
| GO_NEGATIVE_REGULATION_OF_OSTEOBLAST_DIFFERENTIATION                     | Development | 0.005571677 | 0.013893477 | 0.42881954 | 1.671147758 | 51  | D4_G2 |
| GO_EPIDERMAL_CELL_DIFFERENTIATION                                        | Development | 0.001153137 | 0.003707191 | 0.36239059 | 1.666669873 | 125 | D4_G2 |
| GO_AORTA_MORPHOGENESIS                                                   | Development | 0.006158494 | 0.015067008 | 0.43052629 | 1.664174353 | 49  | D4_G2 |
| GO_SKELETAL_SYSTEM_MORPHOGENESIS                                         | Development | 0.000350918 | 0.001397836 | 0.3327136  | 1.659041713 | 218 | D4_G2 |
| GO_REGULATION_OF_MYELOID_LEUKOCYTE_DIFFERENTIATION                       | Development | 0.001391466 | 0.004319415 | 0.36379457 | 1.657774789 | 119 | D4_G2 |
| GO_CELL_DIFFERENTIATION_INVOLVED_IN_EMBRYONIC_PLACENTA_DEVELOPMENT       | Development | 0.016899078 | 0.03496671  | 0.48017968 | 1.641882389 | 29  | D4_G2 |
| GO_EMBRYONIC_HINDLIMB_MORPHOGENESIS                                      | Development | 0.014160328 | 0.030432969 | 0.45938196 | 1.630352486 | 34  | D4_G2 |
| GO_NEGATIVE_REGULATION_OF_STRIATED_MUSCLE_CELL_DIFFERENTIATION           | Development | 0.019411765 | 0.039743034 | 0.48259622 | 1.624560646 | 27  | D4_G2 |
| GO_ENDOCRINE_PANCREAS_DEVELOPMENT                                        | Development | 0.012206464 | 0.026526896 | 0.43679383 | 1.622051037 | 41  | D4_G2 |
| GO_EMBRYONIC_PLACENTA_DEVELOPMENT                                        | Development | 0.003592537 | 0.009704839 | 0.36917025 | 1.620522786 | 95  | D4_G2 |
| GO_NEGATIVE_REGULATION_OF_MUSCLE_ORGAN_DEVELOPMENT                       | Development | 0.010883409 | 0.024192263 | 0.43356739 | 1.619779386 | 42  | D4_G2 |
| GO_REGULATION_OF_CELL_FATE_COMMITMENT                                    | Development | 0.02068069  | 0.041682842 | 0.47243081 | 1.615386631 | 29  | D4_G2 |
| GO_EPITHELIAL_CELL_DEVELOPMENT                                           | Development | 0.000352154 | 0.001397836 | 0.31970214 | 1.606003289 | 232 | D4_G2 |
| GO_FEMALE_SEX_DIFFERENTIATION                                            | Development | 0.002658345 | 0.007334015 | 0.35012276 | 1.605296921 | 123 | D4_G2 |
| GO_LABYRINTHINE_LAYER_DEVELOPMENT                                        | Development | 0.010812696 | 0.024173212 | 0.41183077 | 1.598905312 | 50  | D4_G2 |
| GO_POSITIVE_REGULATION_OF_MYELOID_CELL_DIFFERENTIATION                   | Development | 0.007762716 | 0.017974384 | 0.38100307 | 1.589254097 | 71  | D4_G2 |
| GO_SKELETAL_MUSCLE_ORGAN_DEVELOPMENT                                     | Development | 0.002572498 | 0.007147869 | 0.33631295 | 1.586081186 | 148 | D4_G2 |
| GO_EPITHELIAL_CELL_MORPHOGENESIS                                         | Development | 0.011197947 | 0.024610177 | 0.39580149 | 1.576249298 | 57  | D4_G2 |



|                                                                          |             |             |             |            |             |     |       |
|--------------------------------------------------------------------------|-------------|-------------|-------------|------------|-------------|-----|-------|
| GO REGULATION OF MUSCLE TISSUE DEVELOPMENT                               | Development | 0.003238866 | 0.008872669 | 0.33920763 | 1.575293021 | 133 | D4_G2 |
| GO_NEGATIVE_REGULATION_OF_LEUKOCYTE_DIFFERENTIATION                      | Development | 0.004995353 | 0.012954616 | 0.34965752 | 1.573987829 | 110 | D4_G2 |
| GO_REGULATION_OF_MESENCHYMAL_CELL_PROLIFERATION                          | Development | 0.013493079 | 0.029160043 | 0.40160185 | 1.570661716 | 52  | D4_G2 |
| GO_EMBRYONIC_SKELETAL_SYSTEM_MORPHOGENESIS                               | Development | 0.004738241 | 0.01245389  | 0.34216379 | 1.562515486 | 120 | D4_G2 |
| GO_REGULATION_OF_SKELETAL_MUSCLE_TISSUE_DEVELOPMENT                      | Development | 0.01060641  | 0.023849095 | 0.37751672 | 1.560019854 | 67  | D4_G2 |
| GO_ENDOCHONDRAL_BONE_MORPHOGENESIS                                       | Development | 0.014828545 | 0.031693978 | 0.39141706 | 1.556384863 | 56  | D4_G2 |
| GO_NEGATIVE_REGULATION_OF_MYELOID_LEUKOCYTE_DIFFERENTIATION              | Development | 0.022618631 | 0.044891059 | 0.42570333 | 1.556098877 | 38  | D4_G2 |
| GO_EMBRYONIC_CAMERA_TYPE_EYE_DEVELOPMENT                                 | Development | 0.015227246 | 0.032192385 | 0.39571972 | 1.555018448 | 53  | D4_G2 |
| GO_POSITIVE_REGULATION_OF_LEUKOCYTE_DIFFERENTIATION                      | Development | 0.006854089 | 0.016357305 | 0.34370992 | 1.547214612 | 110 | D4_G2 |
| GO_NEGATIVE_REGULATION_OF_OSTEOCLAST_DIFFERENTIATION                     | Development | 0.018747089 | 0.038585278 | 0.40181728 | 1.545924663 | 48  | D4_G2 |
| GO_NEGATIVE_REGULATION_OF_MYELOID_LEUKOCYTE_DIFFERENTIATION              | Development | 0.011917158 | 0.026043678 | 0.37209107 | 1.545804026 | 69  | D4_G2 |
| GO_NEURAL_TUBE_DEVELOPMENT                                               | Development | 0.001758087 | 0.005260738 | 0.3086394  | 1.539464343 | 219 | D4_G2 |
| GO_MALE_SEX_DIFFERENTIATION                                              | Development | 0.003269119 | 0.008892917 | 0.31700851 | 1.535561099 | 176 | D4_G2 |
| GO_MYELOID_LEUKOCYTE_DIFFERENTIATION                                     | Development | 0.007645968 | 0.017974384 | 0.34188199 | 1.534257855 | 108 | D4_G2 |
| GO_EMBRYONIC_AXIS_SPECIFICATION                                          | Development | 0.025017454 | 0.049399947 | 0.41554581 | 1.534011178 | 40  | D4_G2 |
| GO_PALATE_DEVELOPMENT                                                    | Development | 0.005419742 | 0.013601803 | 0.3333797  | 1.533245954 | 125 | D4_G2 |
| GO_POSITIVE_REGULATION_OF_CELL_MORPHOGENESIS_INVOLVED_IN_DIFFERENTIATION | Development | 0.001646478 | 0.005003749 | 0.30413002 | 1.533068074 | 238 | D4_G2 |
| GO_REGULATION_OF_OSTEOBLAST_DIFFERENTIATION                              | Development | 0.005320995 | 0.013528542 | 0.32857043 | 1.525893493 | 133 | D4_G2 |
| GO_REGULATION_OF_MUSCLE_ORGAN_DEVELOPMENT                                | Development | 0.005210142 | 0.013333851 | 0.32872246 | 1.52447622  | 132 | D4_G2 |
| GO_COLUMNAR_CUBOIDAL_EPITHELIAL_CELL_DIFFERENTIATION                     | Development | 0.006268865 | 0.015241177 | 0.32969517 | 1.52064352  | 128 | D4_G2 |
| GO_REGULATION_OF_STEM_CELL_PROLIFERATION                                 | Development | 0.009957161 | 0.022519393 | 0.3381494  | 1.515067839 | 107 | D4_G2 |
| GO_HEMATOPOIETIC_PROGENITOR_CELL_DIFFERENTIATION                         | Development | 0.006360587 | 0.015301576 | 0.32853469 | 1.513824091 | 127 | D4_G2 |
| GO_NEGATIVE_REGULATION_OF_MUSCLE_CELL_DIFFERENTIATION                    | Development | 0.02103803  | 0.042184504 | 0.38171884 | 1.512527501 | 55  | D4_G2 |
| GO_REGULATION_OF_OSTEOCLAST_DIFFERENTIATION                              | Development | 0.01533318  | 0.032241118 | 0.36041465 | 1.511875765 | 73  | D4_G2 |
| GO_PLACENTA_DEVELOPMENT                                                  | Development | 0.005383265 | 0.013597988 | 0.31839093 | 1.50290538  | 149 | D4_G2 |
| GO_CHONDROCYTE_DIFFERENTIATION                                           | Development | 0.016117891 | 0.033528661 | 0.35546428 | 1.502889397 | 76  | D4_G2 |
| GO_MORPHOGENESIS_OF_EMBRYONIC_EPITHELIUM                                 | Development | 0.004891684 | 0.012770907 | 0.30803879 | 1.49507747  | 178 | D4_G2 |
| GO_CARDIAC_SEPTUM_MORPHOGENESIS                                          | Development | 0.02147558  | 0.042841029 | 0.36842912 | 1.491778583 | 61  | D4_G2 |
| GO_ENDOTHELIAL_CELL_DIFFERENTIATION                                      | Development | 0.015041074 | 0.031972556 | 0.33632241 | 1.479484679 | 96  | D4_G2 |
| GO_REGULATION_OF_STRIATED_MUSCLE_CELL_DIFFERENTIATION                    | Development | 0.015874855 | 0.033200638 | 0.3369229  | 1.473054309 | 93  | D4_G2 |
| GO_EYE_MORPHOGENESIS                                                     | Development | 0.005614692 | 0.013911561 | 0.29576079 | 1.453108944 | 197 | D4_G2 |
| GO_CARDIAC_SEPTUM_DEVELOPMENT                                            | Development | 0.020122586 | 0.040769197 | 0.30752356 | 1.417008852 | 127 | D4_G2 |
| GO_CAMERA_TYPE_EYE_MORPHOGENESIS                                         | Development | 0.019793863 | 0.040313155 | 0.29774391 | 1.399720138 | 145 | D4_G2 |
| GO_NEURON_FATE_COMMITMENT                                                | Development | 0.000103295 | 0.001441616 | 0.59664783 | 2.464953619 | 77  | D4_G3 |
| GO_CARTILAGE_DEVELOPMENT                                                 | Development | 0.000102775 | 0.001441616 | 0.48593062 | 2.248401493 | 155 | D4_G3 |
| GO_OLIGODENDROCYTE_DIFFERENTIATION                                       | Development | 0.000103767 | 0.001441616 | 0.54037023 | 2.242163084 | 79  | D4_G3 |
| GO_EMBRYONIC_SKELETAL_SYSTEM_MORPHOGENESIS                               | Development | 0.000102955 | 0.001441616 | 0.49564116 | 2.209247143 | 120 | D4_G3 |
| GO_RENAL_TUBULE_DEVELOPMENT                                              | Development | 0.000103306 | 0.001441616 | 0.49970018 | 2.193832071 | 109 | D4_G3 |
| GO_EMBRYONIC_SKELETAL_SYSTEM_DEVELOPMENT                                 | Development | 0.000102817 | 0.001441616 | 0.47309942 | 2.186764064 | 154 | D4_G3 |
| GO_SPINAL_CORD_DEVELOPMENT                                               | Development | 0.000102564 | 0.001441616 | 0.48000988 | 2.182109028 | 138 | D4_G3 |
| GO_BONE TRABECULA MORPHOGENESIS                                          | Development | 0.000205867 | 0.00197642  | 0.62863759 | 2.163177972 | 32  | D4_G3 |
| GO_CHONDROCYTE_DIFFERENTIATION                                           | Development | 0.000103434 | 0.001441616 | 0.52214902 | 2.150364047 | 76  | D4_G3 |
| GO_SKELETAL_SYSTEM_MORPHOGENESIS                                         | Development | 0.000103008 | 0.001441616 | 0.433612   | 2.095534495 | 218 | D4_G3 |
| GO_CONNECTIVE_TISSUE_DEVELOPMENT                                         | Development | 0.000103402 | 0.001441616 | 0.42772028 | 2.059621703 | 211 | D4_G3 |
| GO_CHONDROCYTE_DEVELOPMENT                                               | Development | 0.000307913 | 0.002584283 | 0.57419875 | 2.04550337  | 37  | D4_G3 |
| GO_NEURON_FATE_SPECIFICATION                                             | Development | 0.000308071 | 0.002584283 | 0.58039511 | 2.040535813 | 35  | D4_G3 |
| GO_CELL_DIFFERENTIATION_IN_SPINAL_CORD                                   | Development | 0.000208312 | 0.00197642  | 0.50324523 | 2.037436514 | 69  | D4_G3 |
| GO_EAR_MORPHOGENESIS                                                     | Development | 0.000102596 | 0.001441616 | 0.43066205 | 2.018196435 | 169 | D4_G3 |
| GO_REGULATION_OF_OLIGODENDROCYTE_DIFFERENTIATION                         | Development | 0.000513452 | 0.003795048 | 0.5643985  | 1.984295406 | 35  | D4_G3 |
| GO_PROXIMAL_DISTAL_PATTERN_FORMATION                                     | Development | 0.000825593 | 0.005476097 | 0.57255128 | 1.983096627 | 33  | D4_G3 |
| GO_ANTERIOR_POSTERIOR_PATTERN_SPECIFICATION                              | Development | 0.000103616 | 0.001441616 | 0.40751839 | 1.978353665 | 228 | D4_G3 |
| GO_CARTILAGE_DEVELOPMENT_INVOLVED_IN_ENDOCHONDRAL_BONE_MORPHOGENESIS     | Development | 0.001134605 | 0.006684705 | 0.59656218 | 1.970814964 | 27  | D4_G3 |

|                                                     |             |             |             |            |             |     |       |
|-----------------------------------------------------|-------------|-------------|-------------|------------|-------------|-----|-------|
| GO_AUTONOMIC_NERVOUS_SYSTEM_DEVELOPMENT             | Development | 0.000207383 | 0.00197642  | 0.50122331 | 1.967046195 | 58  | D4_G3 |
| GO_VENTRICULAR_SEPTUM_MORPHOGENESIS                 | Development | 0.000618174 | 0.004398006 | 0.54963732 | 1.965686404 | 38  | D4_G3 |
| GO_MIDDLE_EAR_MORPHOGENESIS                         | Development | 0.001342005 | 0.007250553 | 0.59965591 | 1.962554821 | 26  | D4_G3 |
| GO_DORSAL_VENTRAL_PATTERN_FORMATION                 | Development | 0.000103114 | 0.001441616 | 0.44239419 | 1.960420893 | 116 | D4_G3 |
| GO TRABECULA MORPHOGENESIS                          | Development | 0.000206804 | 0.00197642  | 0.48553406 | 1.958460728 | 67  | D4_G3 |
| GO_ENDOCHONDRAL_BONE_MORPHOGENESIS                  | Development | 0.000310913 | 0.002584283 | 0.50301024 | 1.958287373 | 56  | D4_G3 |
| GO_CELL_FATE_COMMITMENT                             | Development | 0.000103638 | 0.001441616 | 0.4017159  | 1.951407676 | 229 | D4_G3 |
| GO_SPINAL_CORD_PATTERNING                           | Development | 0.000725238 | 0.004949433 | 0.57516219 | 1.946011158 | 30  | D4_G3 |
| GO_POSITIVE_REGULATION_OF_CARTILAGE_DEVELOPMENT     | Development | 0.001136129 | 0.006684705 | 0.56448818 | 1.92500912  | 31  | D4_G3 |
| GO_GLIA_CELL_DIFFERENTIATION                        | Development | 0.000102754 | 0.001441616 | 0.41003082 | 1.923884501 | 171 | D4_G3 |
| GO_NEPHRON_EPITHELIUM_DEVELOPMENT                   | Development | 0.000103327 | 0.001441616 | 0.43278333 | 1.904607562 | 111 | D4_G3 |
| GO_VENTRAL_SPINAL_CORD_DEVELOPMENT                  | Development | 0.000309246 | 0.002584283 | 0.48015359 | 1.903840565 | 61  | D4_G3 |
| GO_NEGATIVE_REGULATION_OF_GLIA_CELL_DIFFERENTIATION | Development | 0.001445982 | 0.00753876  | 0.558184   | 1.903510674 | 31  | D4_G3 |
| GO_NOTOCHORD_DEVELOPMENT                            | Development | 0.000721873 | 0.004949433 | 0.51097324 | 1.898373736 | 45  | D4_G3 |
| GO_REGULATION_OF_GLIA_CELL_DIFFERENTIATION          | Development | 0.000207533 | 0.00197642  | 0.45688455 | 1.8957552   | 79  | D4_G3 |
| GO_NEPHRON_DEVELOPMENT                              | Development | 0.000102323 | 0.001441616 | 0.41023089 | 1.892914323 | 151 | D4_G3 |
| GO_PALATE_DEVELOPMENT                               | Development | 0.000103199 | 0.001441616 | 0.42239069 | 1.892007024 | 125 | D4_G3 |
| GO_CRANIAL_NERVE_MORPHOGENESIS                      | Development | 0.00051557  | 0.003795048 | 0.50090629 | 1.889221331 | 48  | D4_G3 |
| GO_REGULATION_OF_ASTROCYTE_DIFFERENTIATION          | Development | 0.001238902 | 0.006984532 | 0.51981733 | 1.878463268 | 40  | D4_G3 |
| GO_METANEPHROS_DEVELOPMENT                          | Development | 0.00020749  | 0.00197642  | 0.44555991 | 1.873931374 | 85  | D4_G3 |
| GO_EYE_MORPHOGENESIS                                | Development | 0.000102701 | 0.001441616 | 0.38857121 | 1.857667998 | 197 | D4_G3 |
| GO_INNER_EAR_MORPHOGENESIS                          | Development | 0.000102155 | 0.001441616 | 0.40347671 | 1.857648243 | 149 | D4_G3 |
| GO_KIDNEY_EPITHELIUM_DEVELOPMENT                    | Development | 0.000102743 | 0.001441616 | 0.39908588 | 1.852069358 | 158 | D4_G3 |
| GO_REGULATION_OF_CHONDROCYTE_DIFFERENTIATION        | Development | 0.001137186 | 0.006684705 | 0.48375226 | 1.831239194 | 49  | D4_G3 |
| GO_LENS_MORPHOGENESIS_IN_CAMERA_TYPE_EYE            | Development | 0.002264306 | 0.010612231 | 0.52482746 | 1.830228398 | 34  | D4_G3 |
| GO_CENTRAL_NERVOUS_SYSTEM_NEURON_DEVELOPMENT        | Development | 0.000103337 | 0.001441616 | 0.40784084 | 1.824726635 | 124 | D4_G3 |
| GO_KIDNEY_MORPHOGENESIS                             | Development | 0.000205804 | 0.00197642  | 0.4233458  | 1.805804892 | 91  | D4_G3 |
| GO_APPENDAGE_DEVELOPMENT                            | Development | 0.000103252 | 0.001441616 | 0.37220333 | 1.802533279 | 223 | D4_G3 |
| GO_LIMB_DEVELOPMENT                                 | Development | 0.000103252 | 0.001441616 | 0.37220333 | 1.802533279 | 223 | D4_G3 |
| GO_DIENCEPHALON_DEVELOPMENT                         | Development | 0.000205825 | 0.00197642  | 0.41709655 | 1.798276794 | 97  | D4_G3 |
| GO_POST_ANAL_TAIL_MORPHOGENESIS                     | Development | 0.002667487 | 0.012141715 | 0.50792552 | 1.796472179 | 36  | D4_G3 |
| GO_SMOOTH_MUSCLE_TISSUE_DEVELOPMENT                 | Development | 0.00267986  | 0.012141715 | 0.49739333 | 1.788064131 | 39  | D4_G3 |
| GO_DENDRITE_MORPHOGENESIS                           | Development | 0.000207533 | 0.00197642  | 0.43005225 | 1.784419689 | 79  | D4_G3 |
| GO_AORTA_MORPHOGENESIS                              | Development | 0.00196423  | 0.00967197  | 0.47080664 | 1.782233667 | 49  | D4_G3 |
| GO_MORPHOGENESIS_OF_AN_EPITHELIAL_SHEET             | Development | 0.000517063 | 0.003795048 | 0.42893606 | 1.776810119 | 78  | D4_G3 |
| GO_REGULATION_OF_STEM_CELL_PROLIFERATION            | Development | 0.000103242 | 0.001441616 | 0.4049648  | 1.774771357 | 107 | D4_G3 |
| GO_REGULATION_OF_OSTEOBLAST_DIFFERENTIATION         | Development | 0.000103338 | 0.001441616 | 0.39114036 | 1.766958187 | 133 | D4_G3 |
| GO_PERICARDIUM_DEVELOPMENT                          | Development | 0.005574481 | 0.020652126 | 0.5394156  | 1.765400266 | 26  | D4_G3 |
| GO_CAMERA_TYPE_EYE_MORPHOGENESIS                    | Development | 0.000206101 | 0.00197642  | 0.38468187 | 1.761499715 | 145 | D4_G3 |
| GO_BRANCHING_MORPHOGENESIS_OF_AN_EPITHELIAL_TUBE    | Development | 0.000102743 | 0.001441616 | 0.36686601 | 1.759920922 | 203 | D4_G3 |
| GO_DIGESTIVE_SYSTEM_DEVELOPMENT                     | Development | 0.000205931 | 0.00197642  | 0.36975631 | 1.757161956 | 189 | D4_G3 |
| GO_EMBRYONIC_EYE_MORPHOGENESIS                      | Development | 0.002170991 | 0.010426119 | 0.46061466 | 1.751481122 | 50  | D4_G3 |
| GO_LENS_DEVELOPMENT_IN_CAMERA_TYPE_EYE              | Development | 0.00031224  | 0.002584283 | 0.42017552 | 1.750761694 | 81  | D4_G3 |
| GO_CRANIAL_NERVE_DEVELOPMENT                        | Development | 0.000930714 | 0.005973506 | 0.42151846 | 1.746083713 | 78  | D4_G3 |
| GO_OSTEOBLAST_DIFFERENTIATION                       | Development | 0.000205444 | 0.00197642  | 0.37018492 | 1.744638082 | 177 | D4_G3 |
| GO_OTIC_VESICLE_DEVELOPMENT                         | Development | 0.005043228 | 0.019233486 | 0.49689061 | 1.732804349 | 34  | D4_G3 |
| GO_POSITIVE_REGULATION_OF_STEM_CELL_PROLIFERATION   | Development | 0.000830565 | 0.005476097 | 0.41622644 | 1.731263793 | 80  | D4_G3 |
| GO_BONE_MORPHOGENESIS                               | Development | 0.000413437 | 0.00335056  | 0.40221204 | 1.726530126 | 95  | D4_G3 |
| GO_OLIGODENDROCYTE_DEVELOPMENT                      | Development | 0.004521167 | 0.018065384 | 0.46790363 | 1.722558301 | 43  | D4_G3 |
| GO_REGULATION_OF_CARTILAGE_DEVELOPMENT              | Development | 0.001554243 | 0.007955271 | 0.43051307 | 1.72225826  | 64  | D4_G3 |
| GO_NEURAL_RETINA_DEVELOPMENT                        | Development | 0.001859312 | 0.009272723 | 0.42694738 | 1.718134343 | 66  | D4_G3 |
| GO_HYPOTHALAMUS_DEVELOPMENT                         | Development | 0.00815526  | 0.027114496 | 0.52367598 | 1.713887598 | 26  | D4_G3 |

|                                                      |             |             |             |            |              |     |       |
|------------------------------------------------------|-------------|-------------|-------------|------------|--------------|-----|-------|
| GO_SKELETAL_MUSCLE_CELL_DIFFERENTIATION              | Development | 0.003007051 | 0.013143178 | 0.43492444 | 1.706856895  | 58  | D4_G3 |
| GO_PIGMENT_CELL_DIFFERENTIATION                      | Development | 0.007205353 | 0.024586685 | 0.49594212 | 1.706565257  | 32  | D4_G3 |
| GO_ARTERY_MORPHOGENESIS                              | Development | 0.000936719 | 0.005973506 | 0.40890735 | 1.703810184  | 81  | D4_G3 |
| GO_PALLIUM_DEVELOPMENT                               | Development | 0.000102796 | 0.001441616 | 0.34730363 | 1.699571218  | 241 | D4_G3 |
| GO_SPINAL_CORD_MOTOR_NEURON_DIFFERENTIATION          | Development | 0.004743735 | 0.018270426 | 0.45744489 | 1.699504594  | 45  | D4_G3 |
| GO_CEREBRAL_CORTEX_DEVELOPMENT                       | Development | 0.000510777 | 0.003795048 | 0.3638748  | 1.69785682   | 163 | D4_G3 |
| GO_MAMMARY_GLAND_EPITHELIUM_DEVELOPMENT              | Development | 0.00115135  | 0.006684705 | 0.40568086 | 1.691757625  | 82  | D4_G3 |
| GO_STEM_CELL_PROLIFERATION                           | Development | 0.001453488 | 0.00753876  | 0.4066202  | 1.691307344  | 80  | D4_G3 |
| GO_RETINA_DEVELOPMENT_IN_CAMERA_TYPE_EYE             | Development | 0.000307377 | 0.002584283 | 0.35580448 | 1.681997332  | 181 | D4_G3 |
| GO_GLIAL_CELL_DEVELOPMENT                            | Development | 0.001033805 | 0.006383338 | 0.39270843 | 1.680270096  | 93  | D4_G3 |
| GO_FORELIMB_MORPHOGENESIS                            | Development | 0.006284772 | 0.022429142 | 0.46912559 | 1.67774962   | 38  | D4_G3 |
| GO_DEVELOPMENTAL_PIGMENTATION                        | Development | 0.006504233 | 0.023001333 | 0.46337292 | 1.67449016   | 40  | D4_G3 |
| GO_CARDIAC_SEPTUM_MORPHOGENESIS                      | Development | 0.004123286 | 0.017063387 | 0.42161042 | 1.671713012  | 61  | D4_G3 |
| GO_POSITIVE_REGULATION_OF_OSTEOBLAST_DIFFERENTIATION | Development | 0.003408739 | 0.014571422 | 0.41490418 | 1.669669768  | 66  | D4_G3 |
| GO_CELL_FATE_SPECIFICATION                           | Development | 0.001665279 | 0.008412903 | 0.40034473 | 1.6681351991 | 81  | D4_G3 |
| GO_HINDBRAIN_DEVELOPMENT                             | Development | 0.000206143 | 0.00197642  | 0.34717929 | 1.667759331  | 206 | D4_G3 |
| GO_COCHLEA_DEVELOPMENT                               | Development | 0.004226368 | 0.017305866 | 0.41986631 | 1.664797511  | 61  | D4_G3 |
| GO_DIGESTIVE_TRACT_MORPHOGENESIS                     | Development | 0.002984767 | 0.013143178 | 0.40447905 | 1.656768638  | 73  | D4_G3 |
| GO_POSITIVE_REGULATION_OF_GLIAL_CELL_DIFFERENTIATION | Development | 0.009438802 | 0.030344577 | 0.46576859 | 1.647368106  | 36  | D4_G3 |
| GO_CORPUS_CALLOSUM_DEVELOPMENT                       | Development | 0.012637249 | 0.038107673 | 0.49203272 | 1.637493402  | 28  | D4_G3 |
| GO_ENDOCRINE_SYSTEM_DEVELOPMENT                      | Development | 0.001238262 | 0.006984532 | 0.36289971 | 1.633630486  | 129 | D4_G3 |
| GO_LIMBIC_SYSTEM_DEVELOPMENT                         | Development | 0.001026273 | 0.006383338 | 0.35693259 | 1.629425771  | 142 | D4_G3 |
| GO_OSTEOBLAST_DEVELOPMENT                            | Development | 0.018415063 | 0.048558771 | 0.50153344 | 1.62468075   | 25  | D4_G3 |
| GO_POST_EMBRYONIC_DEVELOPMENT                        | Development | 0.001445087 | 0.00753876  | 0.35823499 | 1.613741681  | 130 | D4_G3 |
| GO_STEM_CELL_DIVISION                                | Development | 0.010480888 | 0.032879559 | 0.43826116 | 1.613431359  | 43  | D4_G3 |
| GO_DEVELOPMENTAL_GROWTH_INVOLVED_IN_MORPHOGENESIS    | Development | 0.001333333 | 0.007250553 | 0.35482523 | 1.613023775  | 138 | D4_G3 |
| GO_ENDOCARDIAL_CUSHION_MORPHOGENESIS                 | Development | 0.014815582 | 0.042376923 | 0.47599445 | 1.610485773  | 30  | D4_G3 |
| GO_MORPHOGENESIS_OF_A_BRANCHING_STRUCTURE            | Development | 0.000621826 | 0.004398006 | 0.33139995 | 1.609835208  | 229 | D4_G3 |
| GO_NEURAL_TUBE_DEVELOPMENT                           | Development | 0.000516156 | 0.003795048 | 0.33266619 | 1.608080831  | 219 | D4_G3 |
| GO_LENS_FIBER_CELL_DIFFERENTIATION                   | Development | 0.011028654 | 0.034048781 | 0.44589573 | 1.602936985  | 39  | D4_G3 |
| GO_PLACENTA_BLOOD_VESSEL_DEVELOPMENT                 | Development | 0.014306299 | 0.041530972 | 0.45910944 | 1.601050249  | 34  | D4_G3 |
| GO_PITUITARY_GLAND_DEVELOPMENT                       | Development | 0.008787346 | 0.028485647 | 0.42062197 | 1.599409457  | 50  | D4_G3 |
| GO_SCHWANN_CELL_DIFFERENTIATION                      | Development | 0.013187719 | 0.039461713 | 0.44414662 | 1.588416462  | 38  | D4_G3 |
| GO_RETINA_MORPHOGENESIS_IN_CAMERA_TYPE_EYE           | Development | 0.008347934 | 0.027519883 | 0.39986935 | 1.580010307  | 60  | D4_G3 |
| GO_PERIPHERAL_NERVOUS_SYSTEM_DEVELOPMENT             | Development | 0.005208333 | 0.019670307 | 0.37761806 | 1.579444581  | 83  | D4_G3 |
| GO_PATTERNING_OF_BLOOD_VESSELS                       | Development | 0.007858546 | 0.026353228 | 0.38864929 | 1.567664214  | 67  | D4_G3 |
| GO_FOREBRAIN_NEURON_DEVELOPMENT                      | Development | 0.009706733 | 0.030698529 | 0.3975396  | 1.565379599  | 59  | D4_G3 |
| GO_RETINA_VASCULATURE_DEVELOPMENT_IN_CAMERA_TYPE_EYE | Development | 0.018474802 | 0.048558771 | 0.43912806 | 1.563568015  | 37  | D4_G3 |
| GO_OSTEOCLAST_DIFFERENTIATION                        | Development | 0.016020672 | 0.04483483  | 0.42710022 | 1.561783814  | 42  | D4_G3 |
| GO_BRANCHING_INVOLVED_IN_URETERIC_BUD_MORPHOGENESIS  | Development | 0.01119287  | 0.034283672 | 0.40079724 | 1.560358252  | 56  | D4_G3 |
| GO_ARTERY_DEVELOPMENT                                | Development | 0.002788104 | 0.01246635  | 0.34675171 | 1.558985257  | 128 | D4_G3 |
| GO_DENDRITE_DEVELOPMENT                              | Development | 0.002684287 | 0.012141715 | 0.34426023 | 1.557842856  | 134 | D4_G3 |
| GO_NEURAL_CRESCENT_CELL_DIFFERENTIATION              | Development | 0.00588843  | 0.021407469 | 0.36358777 | 1.553176203  | 92  | D4_G3 |
| GO_HIPPOCAMPUS_DEVELOPMENT                           | Development | 0.004645881 | 0.018072476 | 0.35437465 | 1.553058393  | 107 | D4_G3 |
| GO_SKIN_EPIDERMIS_DEVELOPMENT                        | Development | 0.008481589 | 0.02772553  | 0.37624481 | 1.549487373  | 76  | D4_G3 |
| GO_REGULATION_OF_MESENCHYMAL_CELL_PROLIFERATION      | Development | 0.013405383 | 0.039806824 | 0.4041098  | 1.546514316  | 52  | D4_G3 |
| GO_DEVELOPMENTAL_CELL_GROWTH                         | Development | 0.005758355 | 0.021132075 | 0.35440308 | 1.542664738  | 103 | D4_G3 |
| GO_ASTROCYTE_DIFFERENTIATION                         | Development | 0.015920604 | 0.04483483  | 0.40518418 | 1.533820525  | 49  | D4_G3 |
| GO_LUNG_ALVEOLUS_DEVELOPMENT                         | Development | 0.016540887 | 0.045312712 | 0.40165973 | 1.527305781  | 50  | D4_G3 |
| GO_BONE_DEVELOPMENT                                  | Development | 0.001337173 | 0.007250553 | 0.31788741 | 1.526835275  | 205 | D4_G3 |
| GO_CARDIAC_CHAMBER_MORPHOGENESIS                     | Development | 0.003379416 | 0.014571422 | 0.33071224 | 1.520867967  | 148 | D4_G3 |
| GO_NERVE_DEVELOPMENT                                 | Development | 0.007734351 | 0.026162282 | 0.34376623 | 1.50887019   | 108 | D4_G3 |

|                                                                          |             |             |             |            |             |     |       |
|--------------------------------------------------------------------------|-------------|-------------|-------------|------------|-------------|-----|-------|
| GO REGULATION OF EPITHELIAL CELL DIFFERENTIATION                         | Development | 0.006591143 | 0.023098691 | 0.33816946 | 1.508544107 | 121 | D4_G3 |
| GO SKELETAL MUSCLE ORGAN DEVELOPMENT                                     | Development | 0.003789042 | 0.015848791 | 0.32720016 | 1.504716737 | 148 | D4_G3 |
| GO MESENCHYME DEVELOPMENT                                                | Development | 0.002059096 | 0.010012355 | 0.31070339 | 1.499445182 | 215 | D4_G3 |
| GO VENTRICULAR SEPTUM DEVELOPMENT                                        | Development | 0.014462595 | 0.0416737   | 0.36918669 | 1.497520891 | 70  | D4_G3 |
| GO MESENCHYMAL CELL DIFFERENTIATION                                      | Development | 0.003683995 | 0.015576892 | 0.31997551 | 1.491603185 | 162 | D4_G3 |
| GO ENDOTHELIAL CELL DIFFERENTIATION                                      | Development | 0.01083256  | 0.033710925 | 0.34393329 | 1.479046656 | 96  | D4_G3 |
| GO METENCEPHALON DEVELOPMENT                                             | Development | 0.005444273 | 0.020363676 | 0.31661093 | 1.465943227 | 156 | D4_G3 |
| GO SOMITE DEVELOPMENT                                                    | Development | 0.014040884 | 0.041139149 | 0.33012772 | 1.446795451 | 107 | D4_G3 |
| GO MESONEPHROS DEVELOPMENT                                               | Development | 0.015012853 | 0.042627737 | 0.33208886 | 1.445534198 | 103 | D4_G3 |
| GO FEMALE SEX DIFFERENTIATION                                            | Development | 0.01406557  | 0.041139149 | 0.32035713 | 1.431792629 | 123 | D4_G3 |
| GO MAMMARY GLAND DEVELOPMENT                                             | Development | 0.011541632 | 0.035075742 | 0.31267658 | 1.431779736 | 145 | D4_G3 |
| GO CARDIAC CHAMBER DEVELOPMENT                                           | Development | 0.006193229 | 0.022307092 | 0.29466769 | 1.42036859  | 213 | D4_G3 |
| GO CARDIAC SEPTUM DEVELOPMENT                                            | Development | 0.016406976 | 0.045264635 | 0.31477852 | 1.413863928 | 127 | D4_G3 |
| GO GLAND MORPHOGENESIS                                                   | Development | 0.016406976 | 0.045264635 | 0.31465522 | 1.413310145 | 127 | D4_G3 |
| GO REGULATION OF MUSCLE CELL DIFFERENTIATION                             | Development | 0.009654889 | 0.030698529 | 0.29796312 | 1.407303459 | 180 | D4_G3 |
| GO REGULATION OF MUSCLE TISSUE DEVELOPMENT                               | Development | 0.017877441 | 0.047886117 | 0.30941942 | 1.397787651 | 133 | D4_G3 |
| GO STEM CELL DIFFERENTIATION                                             | Development | 0.006923633 | 0.024047262 | 0.28846305 | 1.397526103 | 224 | D4_G3 |
| GO CARDIAC MUSCLE TISSUE DEVELOPMENT                                     | Development | 0.017972682 | 0.047886117 | 0.28435283 | 1.350915754 | 188 | D4_G3 |
| GO POSITIVE REGULATION OF CELL MORPHOGENESIS INVOLVED IN DIFFERENTIATION | Development | 0.017498713 | 0.04727083  | 0.27051123 | 1.321530262 | 238 | D4_G3 |
| GO PLACENTA DEVELOPMENT                                                  | Development | 0.004601978 | 0.018072476 | -0.3251107 | -1.4936215  | 149 | D4_G3 |
| GO EMBRYONIC PLACENTA DEVELOPMENT                                        | Development | 0.004551177 | 0.018065384 | -0.3617128 | -1.55172353 | 95  | D4_G3 |
| GO MYELOID LEUKOCYTE DIFFERENTIATION                                     | Development | 0.002231926 | 0.01058804  | -0.358332  | -1.56874913 | 108 | D4_G3 |
| GO DENDRITIC CELL DIFFERENTIATION                                        | Development | 0.017221362 | 0.046846922 | -0.4941639 | -1.59726175 | 25  | D4_G3 |
| GO ANTERIOR POSTERIOR AXIS SPECIFICATION                                 | Development | 0.007047693 | 0.024261526 | -0.4125693 | -1.61231175 | 58  | D4_G3 |
| GO BLASTOCYST DEVELOPMENT                                                | Development | 0.004369356 | 0.017704996 | -0.4184938 | -1.64491174 | 60  | D4_G3 |
| GO VENTRAL SPINAL CORD DEVELOPMENT                                       | Development | 8.23E-05    | 0.001845973 | 0.67170365 | 2.649327714 | 61  | D4_G4 |
| GO CELL DIFFERENTIATION IN SPINAL CORD                                   | Development | 8.10E-05    | 0.001845973 | 0.65737574 | 2.648925364 | 69  | D4_G4 |
| GO NEURON FATE COMMITMENT                                                | Development | 7.95E-05    | 0.001845973 | 0.63317335 | 2.61119216  | 77  | D4_G4 |
| GO SPINAL CORD DEVELOPMENT                                               | Development | 7.30E-05    | 0.001845973 | 0.57228142 | 2.593750044 | 138 | D4_G4 |
| GO NEURON FATE SPECIFICATION                                             | Development | 8.84E-05    | 0.001845973 | 0.72212213 | 2.530094606 | 35  | D4_G4 |
| GO SPINAL CORD PATTERNING                                                | Development | 9.02E-05    | 0.001845973 | 0.69763508 | 2.358267831 | 30  | D4_G4 |
| GO RETINA MORPHOGENESIS IN CAMERA TYPE EYE                               | Development | 8.22E-05    | 0.001845973 | 0.5958463  | 2.343133817 | 60  | D4_G4 |
| GO NEURAL RETINA DEVELOPMENT                                             | Development | 8.16E-05    | 0.001845973 | 0.58027605 | 2.321490603 | 66  | D4_G4 |
| GO SPINAL CORD MOTOR NEURON DIFFERENTIATION                              | Development | 0.000171365 | 0.003071627 | 0.59611624 | 2.207425445 | 45  | D4_G4 |
| GO ENDOCRINE PANCREAS DEVELOPMENT                                        | Development | 0.000173717 | 0.003071627 | 0.60436103 | 2.191883545 | 41  | D4_G4 |
| GO CELL FATE COMMITMENT                                                  | Development | 6.72E-05    | 0.001845973 | 0.44739881 | 2.171099421 | 229 | D4_G4 |
| GO GLANDULAR EPITHELIAL CELL DIFFERENTIATION                             | Development | 0.000170285 | 0.003071627 | 0.58060197 | 2.163216881 | 46  | D4_G4 |
| GO CELL FATE SPECIFICATION                                               | Development | 7.91E-05    | 0.001845973 | 0.51643569 | 2.144904916 | 81  | D4_G4 |
| GO AUTONOMIC NERVOUS SYSTEM DEVELOPMENT                                  | Development | 8.28E-05    | 0.001845973 | 0.54590569 | 2.130032477 | 58  | D4_G4 |
| GO CENTRAL NERVOUS SYSTEM NEURON DEVELOPMENT                             | Development | 7.41E-05    | 0.001845973 | 0.47447688 | 2.119517706 | 124 | D4_G4 |
| GO CAMERA TYPE EYE MORPHOGENESIS                                         | Development | 7.23E-05    | 0.001845973 | 0.45394462 | 2.076325775 | 145 | D4_G4 |
| GO ENDOCRINE SYSTEM DEVELOPMENT                                          | Development | 7.38E-05    | 0.001845973 | 0.46114483 | 2.070747472 | 129 | D4_G4 |
| GO RETINA DEVELOPMENT IN CAMERA TYPE EYE                                 | Development | 7.02E-05    | 0.001845973 | 0.43906682 | 2.066579361 | 181 | D4_G4 |
| GO SYMPATHETIC NERVOUS SYSTEM DEVELOPMENT                                | Development | 0.000527797 | 0.007658762 | 0.58324171 | 2.058120109 | 36  | D4_G4 |
| GO HINDBRAIN DEVELOPMENT                                                 | Development | 6.85E-05    | 0.001845973 | 0.42916717 | 2.056370058 | 206 | D4_G4 |
| GO PANCREAS DEVELOPMENT                                                  | Development | 7.91E-05    | 0.001845973 | 0.49401407 | 2.056006738 | 82  | D4_G4 |
| GO CELL DIFFERENTIATION IN HINDBRAIN                                     | Development | 0.000531585 | 0.007658762 | 0.57264915 | 1.993267799 | 34  | D4_G4 |
| GO CARDIAC ATRIUM DEVELOPMENT                                            | Development | 0.00034822  | 0.005644061 | 0.552089   | 1.991900258 | 40  | D4_G4 |
| GO EYE MORPHOGENESIS                                                     | Development | 6.91E-05    | 0.001845973 | 0.40757859 | 1.941185163 | 197 | D4_G4 |
| GO METENCEPHALON DEVELOPMENT                                             | Development | 7.17E-05    | 0.001845973 | 0.4135556  | 1.908842839 | 156 | D4_G4 |
| GO ASTROCYTE DIFFERENTIATION                                             | Development | 0.000678829 | 0.009430875 | 0.49960607 | 1.884840665 | 49  | D4_G4 |
| GO DORSAL VENTRAL PATTERN FORMATION                                      | Development | 0.00037546  | 0.005842157 | 0.41874722 | 1.850269314 | 116 | D4_G4 |

|                                                                          |             |             |             |            |             |     |       |
|--------------------------------------------------------------------------|-------------|-------------|-------------|------------|-------------|-----|-------|
| GO_GLIAL_CELL_DIFFERENTIATION                                            | Development | 0.000211297 | 0.003573682 | 0.393774   | 1.841823452 | 171 | D4_G4 |
| GO_PERICARDIUM_DEVELOPMENT                                               | Development | 0.004478567 | 0.043554063 | 0.56189307 | 1.835884798 | 26  | D4_G4 |
| GO_OLIGODENDROCYTE_DIFFERENTIATION                                       | Development | 0.004046977 | 0.040365998 | 0.41066941 | 1.698530975 | 79  | D4_G4 |
| GO_GLIAL_CELL_DEVELOPMENT                                                | Development | 0.003095257 | 0.033445966 | 0.39742583 | 1.693858872 | 93  | D4_G4 |
| GO_NERVE_DEVELOPMENT                                                     | Development | 0.002119927 | 0.025770366 | 0.38769828 | 1.693286706 | 108 | D4_G4 |
| GO_HIPPOCAMPUS_DEVELOPMENT                                               | Development | 0.002884469 | 0.033001724 | 0.38247577 | 1.667158226 | 107 | D4_G4 |
| GO_LIMBIC_SYSTEM_DEVELOPMENT                                             | Development | 0.003339868 | 0.035113746 | 0.35073383 | 1.597866918 | 142 | D4_G4 |
| GO_CARDIAC_CHAMBER_DEVELOPMENT                                           | Development | 0.002109848 | 0.025770366 | 0.32730602 | 1.575221742 | 213 | D4_G4 |
| GO_PALLIUM_DEVELOPMENT                                                   | Development | 0.002792368 | 0.03291609  | 0.31704658 | 1.547196901 | 241 | D4_G4 |
| GO_ANTERIOR_POSTERIOR_PATTERN_SPECIFICATION                              | Development | 0.003700215 | 0.03787852  | 0.31449925 | 1.525117263 | 228 | D4_G4 |
| GO_EPIDERMAL_CELL_DIFFERENTIATION                                        | Development | 0.001384189 | 0.017948324 | -0.3232354 | -1.62634463 | 125 | D4_G4 |
| GO_BLASTOCYST_DEVELOPMENT                                                | Development | 0.003062787 | 0.033445966 | -0.3959407 | -1.72084958 | 60  | D4_G4 |
| GO_ANTERIOR_POSTERIOR_AXIS_SPECIFICATION                                 | Development | 0.000883169 | 0.01184665  | -0.4256967 | -1.83840824 | 58  | D4_G4 |
| GO_CAMERA_TYPE_EYE_MORPHOGENESIS                                         | Development | 0.01210845  | 0.042434116 | -0.2785586 | -1.40427446 | 145 | D4_G5 |
| GO_REGULATION_OF_EMBRYONIC_DEVELOPMENT                                   | Development | 0.009159483 | 0.034836616 | -0.2797303 | -1.41962114 | 152 | D4_G5 |
| GO_DIENCEPHALON_DEVELOPMENT                                              | Development | 0.013793103 | 0.047065941 | -0.3071269 | -1.44117767 | 97  | D4_G5 |
| GO_ARTERY_MORPHOGENESIS                                                  | Development | 0.014575052 | 0.04809761  | -0.3233133 | -1.46884218 | 81  | D4_G5 |
| GO_EYE_MORPHOGENESIS                                                     | Development | 0.001996672 | 0.009708819 | -0.2791474 | -1.46904425 | 197 | D4_G5 |
| GO_REGULATION_OF_MUSCLE_CELL_DIFFERENTIATION                             | Development | 0.002497658 | 0.011167691 | -0.2849236 | -1.47681924 | 180 | D4_G5 |
| GO_CEREBRAL_CORTEX_DEVELOPMENT                                           | Development | 0.003412969 | 0.014430924 | -0.2887566 | -1.48067741 | 163 | D4_G5 |
| GO_REGULATION_OF_STEM_CELL_PROLIFERATION                                 | Development | 0.008099825 | 0.031508319 | -0.3104829 | -1.48486672 | 107 | D4_G5 |
| GO_CARDIAC_CHAMBER_DEVELOPMENT                                           | Development | 0.001770538 | 0.008829992 | -0.2817953 | -1.49862322 | 213 | D4_G5 |
| GO_EPITHELIAL_TO_MESENCHYMAL_TRANSITION                                  | Development | 0.011502647 | 0.040677544 | -0.3380999 | -1.50204886 | 74  | D4_G5 |
| GO_BONE_DEVELOPMENT                                                      | Development | 0.001035554 | 0.006577585 | -0.2845414 | -1.50507501 | 205 | D4_G5 |
| GO_MESODERM_DEVELOPMENT                                                  | Development | 0.002552323 | 0.011282426 | -0.301521  | -1.51051493 | 139 | D4_G5 |
| GO_POSITIVE_REGULATION_OF_MUSCLE_CELL_DIFFERENTIATION                    | Development | 0.006854839 | 0.027209513 | -0.323211  | -1.51220927 | 93  | D4_G5 |
| GO_NERVE_DEVELOPMENT                                                     | Development | 0.004859731 | 0.019899318 | -0.3182417 | -1.52385433 | 108 | D4_G5 |
| GO_ARTERY_DEVELOPMENT                                                    | Development | 0.003174603 | 0.013570556 | -0.3096342 | -1.52994007 | 128 | D4_G5 |
| GO_STEM_CELL_DIFFERENTIATION                                             | Development | 0.001468968 | 0.007747718 | -0.2854298 | -1.53019989 | 224 | D4_G5 |
| GO_NEGATIVE_REGULATION_OF_CELL_MORPHOGENESIS_INVOLVED_IN_DIFFERENTIATION | Development | 0.000898473 | 0.005825097 | -0.2955482 | -1.53110308 | 175 | D4_G5 |
| GO_CELL_FATE_SPECIFICATION                                               | Development | 0.00681431  | 0.027209513 | -0.3394176 | -1.54200563 | 81  | D4_G5 |
| GO_REGULATION_OF_GASTRULATION                                            | Development | 0.014157014 | 0.047887639 | -0.3739837 | -1.546108   | 53  | D4_G5 |
| GO_REGULATION_OF_CARTILAGE_DEVELOPMENT                                   | Development | 0.011257361 | 0.040186758 | -0.3588332 | -1.55202202 | 64  | D4_G5 |
| GO_NEURAL_TUBE_DEVELOPMENT                                               | Development | 0.001100514 | 0.006674292 | -0.2930781 | -1.56378979 | 219 | D4_G5 |
| GO_GASTRULATION                                                          | Development | 0.000666889 | 0.004396946 | -0.2999633 | -1.57503854 | 195 | D4_G5 |
| GO_CELL_FATE_COMMITMENT                                                  | Development | 0.000376648 | 0.003019577 | -0.2943383 | -1.58252868 | 229 | D4_G5 |
| GO_LIMBIC_SYSTEM_DEVELOPMENT                                             | Development | 0.000519076 | 0.00373927  | -0.3160744 | -1.58776181 | 142 | D4_G5 |
| GO_GLAND_MORPHOGENESIS                                                   | Development | 0.002187652 | 0.010506131 | -0.3217456 | -1.58788401 | 127 | D4_G5 |
| GO_DENDRITIC_SPINE_DEVELOPMENT                                           | Development | 0.01459002  | 0.04809761  | -0.4132346 | -1.59015212 | 39  | D4_G5 |
| GO_POSITIVE_REGULATION_OF_EPITHELIAL_TO_MESENCHYMAL_TRANSITION           | Development | 0.009958506 | 0.036545839 | -0.3816476 | -1.59271757 | 56  | D4_G5 |
| GO_HEART_VALVE_DEVELOPMENT                                               | Development | 0.012305889 | 0.04274099  | -0.412318  | -1.59783594 | 40  | D4_G5 |
| GO_AORTA_MORPHOGENESIS                                                   | Development | 0.011260557 | 0.040186758 | -0.3937575 | -1.60040905 | 49  | D4_G5 |
| GO_MESENCHYME_DEVELOPMENT                                                | Development | 0.000356633 | 0.003019577 | -0.3008758 | -1.60257669 | 215 | D4_G5 |
| GO_SCHWANN_CELL_DIFFERENTIATION                                          | Development | 0.013292877 | 0.045760434 | -0.4215706 | -1.6096759  | 38  | D4_G5 |
| GO_OTIC_VESICLE_DEVELOPMENT                                              | Development | 0.01455419  | 0.04809761  | -0.4360163 | -1.61439397 | 34  | D4_G5 |
| GO_GLIAL_CELL_DIFFERENTIATION                                            | Development | 0.00059453  | 0.004129862 | -0.3129026 | -1.61489588 | 171 | D4_G5 |
| GO_DIGESTIVE_SYSTEM_DEVELOPMENT                                          | Development | 0.000323729 | 0.003019577 | -0.3095909 | -1.6150811  | 189 | D4_G5 |
| GO_SPINAL_CORD_MOTOR_NEURON_DIFFERENTIATION                              | Development | 0.010708276 | 0.038930087 | -0.4077247 | -1.6222514  | 45  | D4_G5 |
| GO_HIPPOCAMPUS_DEVELOPMENT                                               | Development | 0.001751313 | 0.008829992 | -0.3392432 | -1.62241144 | 107 | D4_G5 |
| GO_CHONDROCYTE_DIFFERENTIATION                                           | Development | 0.00276294  | 0.01207622  | -0.3637106 | -1.62662077 | 76  | D4_G5 |
| GO_PALLIUM_DEVELOPMENT                                                   | Development | 0.000395883 | 0.003019577 | -0.3001253 | -1.62672219 | 241 | D4_G5 |
| GO_POSITIVE_REGULATION_OF_CELL_MORPHOGENESIS_INVOLVED_IN_DIFFERENTIATION | Development | 0.000393856 | 0.003019577 | -0.3014525 | -1.63131074 | 238 | D4_G5 |

|                                                                      |             |             |             |            |             |     |       |
|----------------------------------------------------------------------|-------------|-------------|-------------|------------|-------------|-----|-------|
| GO_NEURAL_TUBE_PATTERNING                                            | Development | 0.007587488 | 0.029813464 | -0.4071154 | -1.647403   | 48  | D4_G5 |
| GO_MORPHOGENESIS_OF_AN_EPITHELIAL_SHEET                              | Development | 0.002416357 | 0.011167691 | -0.3674647 | -1.65535603 | 78  | D4_G5 |
| GO_POST_ANAL_TAIL_MORPHOGENESIS                                      | Development | 0.009693514 | 0.03602768  | -0.4420629 | -1.6629953  | 36  | D4_G5 |
| GO_OLIGODENDROCYTE_DIFFERENTIATION                                   | Development | 0.001490035 | 0.007747718 | -0.372342  | -1.68228112 | 79  | D4_G5 |
| GO_ENDOCARDIAL_CUSHION_MORPHOGENESIS                                 | Development | 0.009224091 | 0.034836616 | -0.4693871 | -1.68575248 | 30  | D4_G5 |
| GO_HEART TRABECULA MORPHOGENESIS                                     | Development | 0.009724695 | 0.03602768  | -0.4661125 | -1.68818608 | 31  | D4_G5 |
| GO_FOREBRAIN_NEURON_DEVELOPMENT                                      | Development | 0.00400534  | 0.016753521 | -0.3992007 | -1.6920594  | 59  | D4_G5 |
| GO_SKIN_EPIDERMIS_DEVELOPMENT                                        | Development | 0.00184196  | 0.009069904 | -0.3804428 | -1.70145241 | 76  | D4_G5 |
| GO_LEFT_RIGHT_PATTERN_FORMATION                                      | Development | 0.009075365 | 0.034836616 | -0.4870494 | -1.7029975  | 27  | D4_G5 |
| GO_MORPHOGENESIS_OF_A_BRANCHING_STRUCTURE                            | Development | 0.000376648 | 0.003019577 | -0.3170168 | -1.70446102 | 229 | D4_G5 |
| GO_CRANIAL_NERVE_DEVELOPMENT                                         | Development | 0.001115242 | 0.006674292 | -0.379157  | -1.70802753 | 78  | D4_G5 |
| GO_CARDIAC_SEPTUM_DEVELOPMENT                                        | Development | 0.000243072 | 0.003019577 | -0.3463275 | -1.70920141 | 127 | D4_G5 |
| GO_BONE_MORPHOGENESIS                                                | Development | 0.000616396 | 0.004154163 | -0.3659011 | -1.71303714 | 95  | D4_G5 |
| GO_ENDOCHONDRAL_BONE_MORPHOGENESIS                                   | Development | 0.002323651 | 0.010890366 | -0.4106636 | -1.71380908 | 56  | D4_G5 |
| GO_CENTRAL_NERVOUS_SYSTEM_NEURON_DEVELOPMENT                         | Development | 0.000239981 | 0.003019577 | -0.3500933 | -1.71835364 | 124 | D4_G5 |
| GO_REGULATION_OF_STEM_CELL_DIFFERENTIATION                           | Development | 0.000298686 | 0.003019577 | -0.3324365 | -1.72007594 | 174 | D4_G5 |
| GO_VENTRICULAR_SEPTUM_DEVELOPMENT                                    | Development | 0.001608292 | 0.008231914 | -0.3957081 | -1.73477918 | 70  | D4_G5 |
| GO_MESONEPHROS_DEVELOPMENT                                           | Development | 0.000215843 | 0.003019577 | -0.3681417 | -1.74846439 | 103 | D4_G5 |
| GO_MESENCHYMAL_CELL_DIFFERENTIATION                                  | Development | 0.000286123 | 0.003019577 | -0.3428514 | -1.75375987 | 162 | D4_G5 |
| GO_SKELETAL_SYSTEM_MORPHOGENESIS                                     | Development | 0.000361141 | 0.003019577 | -0.3290921 | -1.75659468 | 218 | D4_G5 |
| GO_PARASYMPATHETIC_NERVOUS_SYSTEM_DEVELOPMENT                        | Development | 0.004997918 | 0.020251978 | -0.4885037 | -1.77965561 | 32  | D4_G5 |
| GO_REGULATION_OF_STRIATED_MUSCLE_CELL_DIFFERENTIATION                | Development | 0.000201613 | 0.003019577 | -0.3819463 | -1.78701467 | 93  | D4_G5 |
| GO_POSITIVE_REGULATION_OF_STEM_CELL_DIFFERENTIATION                  | Development | 0.00107778  | 0.006654862 | -0.4076484 | -1.79328457 | 71  | D4_G5 |
| GO_VENTRAL_SPINAL_CORD_DEVELOPMENT                                   | Development | 0.001355473 | 0.007432004 | -0.4200606 | -1.79611215 | 61  | D4_G5 |
| GO_METANEPHROS_DEVELOPMENT                                           | Development | 0.000388123 | 0.003019577 | -0.3920873 | -1.79896738 | 85  | D4_G5 |
| GO_BRANCHING_INVOLVED_IN_URETERIC_BUD_MORPHOGENESIS                  | Development | 0.001493776 | 0.007747718 | -0.4317084 | -1.80163447 | 56  | D4_G5 |
| GO_APPENDAGE_DEVELOPMENT                                             | Development | 0.000365631 | 0.003019577 | -0.3363528 | -1.80344835 | 223 | D4_G5 |
| GO_LIMB_DEVELOPMENT                                                  | Development | 0.000365631 | 0.003019577 | -0.3363528 | -1.80344835 | 223 | D4_G5 |
| GO_POSITIVE_REGULATION_OF_STRIATED_MUSCLE_CELL_DIFFERENTIATION       | Development | 0.002320904 | 0.010890366 | -0.4524923 | -1.80682961 | 46  | D4_G5 |
| GO_CARTILAGE_DEVELOPMENT_INVOLVED_IN_ENDOCHONDRAL_BONE_MORPHOGENESIS | Development | 0.004340392 | 0.017961835 | -0.5179584 | -1.81107264 | 27  | D4_G5 |
| GO_DEVELOPMENTAL_GROWTH_INVOLVED_IN_MORPHOGENESIS                    | Development | 0.000254712 | 0.003019577 | -0.3637638 | -1.81942555 | 138 | D4_G5 |
| GO_REGULATION_OF_MYOTUBE_DIFFERENTIATION                             | Development | 0.000508302 | 0.003730747 | -0.4268073 | -1.82495997 | 61  | D4_G5 |
| GO_EMBRYONIC_SKELETAL_SYSTEM_MORPHOGENESIS                           | Development | 0.000235294 | 0.003019577 | -0.3748334 | -1.82856515 | 120 | D4_G5 |
| GO_DORSAL_VENTRAL_PATTERN_FORMATION                                  | Development | 0.000226193 | 0.003019577 | -0.3775688 | -1.83386199 | 116 | D4_G5 |
| GO_ANTERIOR_POSTERIOR_PATTERN_SPECIFICATION                          | Development | 0.000374392 | 0.003019577 | -0.3413481 | -1.83406634 | 228 | D4_G5 |
| GO_CORPUS_CALLOSUM_DEVELOPMENT                                       | Development | 0.002927478 | 0.012653212 | -0.5225492 | -1.8429573  | 28  | D4_G5 |
| GO_OSTEOBLAST_DIFFERENTIATION                                        | Development | 0.000307125 | 0.003019577 | -0.3563633 | -1.84388911 | 177 | D4_G5 |
| GO_NEGATIVE_REGULATION_OF_DEVELOPMENTAL_GROWTH                       | Development | 0.000218914 | 0.003019577 | -0.3858655 | -1.84537964 | 107 | D4_G5 |
| GO_RETINA_VASCULATURE_DEVELOPMENT_IN_CAMERA_TYPE_EYE                 | Development | 0.001293475 | 0.0072922   | -0.4879184 | -1.84949685 | 37  | D4_G5 |
| GO_PALATE_DEVELOPMENT                                                | Development | 0.000241663 | 0.003019577 | -0.3766934 | -1.85206012 | 125 | D4_G5 |
| GO_CHONDROCYTE_DEVELOPMENT                                           | Development | 0.001293475 | 0.0072922   | -0.4887986 | -1.85283323 | 37  | D4_G5 |
| GO_POSITIVE_REGULATION_OF_CARTILAGE_DEVELOPMENT                      | Development | 0.002465416 | 0.011167691 | -0.512765  | -1.85715383 | 31  | D4_G5 |
| GO_POSITIVE_REGULATION_OF_MYOTUBE_DIFFERENTIATION                    | Development | 0.002478476 | 0.011167691 | -0.5447989 | -1.86018507 | 25  | D4_G5 |
| GO_NOTOCHORD_DEVELOPMENT                                             | Development | 0.001223803 | 0.007105363 | -0.4680819 | -1.8624003  | 45  | D4_G5 |
| GO_SYMPATHETIC_NERVOUS_SYSTEM_DEVELOPMENT                            | Development | 0.001425517 | 0.00770175  | -0.5004883 | -1.88278578 | 36  | D4_G5 |
| GO_DEVELOPMENTAL_CELL_GROWTH                                         | Development | 0.000215843 | 0.003019577 | -0.3970445 | -1.88573647 | 103 | D4_G5 |
| GO_CARDIAC_SEPTUM_MORPHOGENESIS                                      | Development | 0.000508302 | 0.003730747 | -0.4415685 | -1.8880765  | 61  | D4_G5 |
| GO_VENTRICULAR_SEPTUM_MORPHOGENESIS                                  | Development | 0.001155902 | 0.006812818 | -0.4950192 | -1.89012368 | 38  | D4_G5 |
| GO_KIDNEY_EPITHELIUM_DEVELOPMENT                                     | Development | 0.000279564 | 0.003019577 | -0.3720213 | -1.8947585  | 158 | D4_G5 |
| GO_REGULATION_OF_OSTEOBLAST_DIFFERENTIATION                          | Development | 0.000250313 | 0.003019577 | -0.3823129 | -1.90066873 | 133 | D4_G5 |
| GO_MESONEPHRIC_TUBULE_MORPHOGENESIS                                  | Development | 0.000342524 | 0.003019577 | -0.4443122 | -1.90447893 | 62  | D4_G5 |
| GO_BRANCHING_MORPHOGENESIS_OF_AN_EPITHELIAL_TUBE                     | Development | 0.000343879 | 0.003019577 | -0.3605497 | -1.90551838 | 203 | D4_G5 |

|                                                                          |             |             |             |            |             |     |       |
|--------------------------------------------------------------------------|-------------|-------------|-------------|------------|-------------|-----|-------|
| GO_NEURAL_CREST_CELL_DIFFERENTIATION                                     | Development | 0.00019988  | 0.003019577 | -0.4080734 | -1.90636451 | 92  | D4_G5 |
| GO_NEPHRON_EPITHELIUM_DEVELOPMENT                                        | Development | 0.000222025 | 0.003019577 | -0.3968306 | -1.91310857 | 111 | D4_G5 |
| GO_CELL_DIFFERENTIATION_IN_SPINAL_CORD                                   | Development | 0.000357398 | 0.003019577 | -0.4376095 | -1.91367564 | 69  | D4_G5 |
| GO_SPINAL_CORD_PATTERNING                                                | Development | 0.001356484 | 0.007432004 | -0.5331797 | -1.91485671 | 30  | D4_G5 |
| GO_AUTONOMIC_NERVOUS_SYSTEM_DEVELOPMENT                                  | Development | 0.000333834 | 0.003019577 | -0.4537845 | -1.91636032 | 58  | D4_G5 |
| GO_EMBRYONIC_SKELETAL_SYSTEM_DEVELOPMENT                                 | Development | 0.000271518 | 0.003019577 | -0.3770918 | -1.918136   | 154 | D4_G5 |
| GO_REGULATION_OF_EPITHELIAL_TO_MESENCHYMAL_TRANSITION                    | Development | 0.000235294 | 0.003019577 | -0.3939558 | -1.9218506  | 120 | D4_G5 |
| GO_CONNECTIVE_TISSUE_DEVELOPMENT                                         | Development | 0.000350385 | 0.003019577 | -0.362377  | -1.92703522 | 211 | D4_G5 |
| GO_PERICARDIUM_DEVELOPMENT                                               | Development | 0.001048355 | 0.006577585 | -0.5594084 | -1.93432677 | 26  | D4_G5 |
| GO_CARTILAGE_DEVELOPMENT                                                 | Development | 0.000273973 | 0.003019577 | -0.3823924 | -1.94443173 | 155 | D4_G5 |
| GO_PATTERNING_OF_BLOOD_VESSELS                                           | Development | 0.000176585 | 0.003019577 | -0.4474919 | -1.94936511 | 67  | D4_G5 |
| GO_CRANIAL_NERVE_MORPHOGENESIS                                           | Development | 0.000619387 | 0.004154163 | -0.4825091 | -1.95248588 | 48  | D4_G5 |
| GO_NEPHRON_DEVELOPMENT                                                   | Development | 0.000267594 | 0.003019577 | -0.3863422 | -1.95988836 | 151 | D4_G5 |
| GO_DENDRITE_DEVELOPMENT                                                  | Development | 0.000251762 | 0.003019577 | -0.3953671 | -1.96680457 | 134 | D4_G5 |
| GO_MESENCHYME_MORPHOGENESIS                                              | Development | 0.000309215 | 0.003019577 | -0.4923352 | -1.98019462 | 47  | D4_G5 |
| GO_CARDIAC_EPITHELIAL_TO_MESENCHYMAL_TRANSITION                          | Development | 0.000537851 | 0.003804075 | -0.5578144 | -1.98501825 | 29  | D4_G5 |
| GO_INNER_EAR_MORPHOGENESIS                                               | Development | 0.000265322 | 0.003019577 | -0.3961442 | -2.00594016 | 149 | D4_G5 |
| GO_NEURON_FATE_COMMITMENT                                                | Development | 0.000184809 | 0.003019577 | -0.4473987 | -2.0068527  | 77  | D4_G5 |
| GO_DENDRITE_MORPHOGENESIS                                                | Development | 0.000186254 | 0.003019577 | -0.4535562 | -2.04921545 | 79  | D4_G5 |
| GO_KIDNEY_MORPHOGENESIS                                                  | Development | 0.00019972  | 0.003019577 | -0.4412979 | -2.05403076 | 91  | D4_G5 |
| GO_BONE TRABECULA MORPHOGENESIS                                          | Development | 0.000277662 | 0.003019577 | -0.5676173 | -2.06787235 | 32  | D4_G5 |
| GO TRABECULA MORPHOGENESIS                                               | Development | 0.000176585 | 0.003019577 | -0.4751232 | -2.06973251 | 67  | D4_G5 |
| GO_OSTEOBLAST_DEVELOPMENT                                                | Development | 0.000130446 | 0.003019577 | -0.6335772 | -2.16331341 | 25  | D4_G5 |
| GO_EAR_MORPHOGENESIS                                                     | Development | 0.000295683 | 0.003019577 | -0.4200961 | -2.16341317 | 169 | D4_G5 |
| GO_NEGATIVE_REGULATION_OF_OSTEOBLAST_DIFFERENTIATION                     | Development | 0.000158655 | 0.003019577 | -0.5273444 | -2.16366711 | 51  | D4_G5 |
| GO_SPINAL_CORD_DEVELOPMENT                                               | Development | 0.000254712 | 0.003019577 | -0.4360577 | -2.18101547 | 138 | D4_G5 |
| GO_RENAL_TUBULE_DEVELOPMENT                                              | Development | 0.000220167 | 0.003019577 | -0.4636053 | -2.22759975 | 109 | D4_G5 |
| GO_MITOCHONDRION_MORPHOGENESIS                                           | Development | 0.007965686 | 0.019991303 | 0.52585175 | 1.626555657 | 31  | D4_G6 |
| GO_PLATELET_MORPHOGENESIS                                                | Development | 0.023382307 | 0.049976469 | 0.50551577 | 1.52938877  | 28  | D4_G6 |
| GO_BLASTOCYST_DEVELOPMENT                                                | Development | 0.01696248  | 0.038587163 | 0.43315018 | 1.49579537  | 60  | D4_G6 |
| GO_NEGATIVE_REGULATION_OF_CELL_MORPHOGENESIS_INVOLVED_IN_DIFFERENTIATION | Development | 0.022556391 | 0.04904891  | -0.2250052 | -1.26251898 | 175 | D4_G6 |
| GO_SKELETAL_MUSCLE_ORGAN_DEVELOPMENT                                     | Development | 0.02027027  | 0.045057915 | -0.2360454 | -1.29509911 | 148 | D4_G6 |
| GO_REGULATION_OF_MUSCLE_CELL_DIFFERENTIATION                             | Development | 0.013192612 | 0.031102583 | -0.2313743 | -1.30463009 | 180 | D4_G6 |
| GO_METENCEPHALON_DEVELOPMENT                                             | Development | 0.011342155 | 0.027098824 | -0.2368491 | -1.309741   | 156 | D4_G6 |
| GO_RETINA_DEVELOPMENT_IN_CAMERA_TYPE_EYE                                 | Development | 0.013333333 | 0.03124498  | -0.2328151 | -1.31149955 | 181 | D4_G6 |
| GO_MAMMARY_GLAND_DEVELOPMENT                                             | Development | 0.01453958  | 0.033466844 | -0.2437404 | -1.33395027 | 145 | D4_G6 |
| GO_CARDIAC_VENTRICLE_DEVELOPMENT                                         | Development | 0.011342155 | 0.027098824 | -0.2443753 | -1.35135943 | 156 | D4_G6 |
| GO_HINDBRAIN_DEVELOPMENT                                                 | Development | 0.003787879 | 0.01227904  | -0.2374684 | -1.36189581 | 206 | D4_G6 |
| GO_ENDOTHELIAL_CELL_DIFFERENTIATION                                      | Development | 0.0136      | 0.031679042 | -0.2664481 | -1.37511651 | 96  | D4_G6 |
| GO_REGULATION_OF_STEM_CELL_DIFFERENTIATION                               | Development | 0.007371007 | 0.018740666 | -0.2474307 | -1.38405607 | 174 | D4_G6 |
| GO_REGULATION_OF_EMBRYONIC_DEVELOPMENT                                   | Development | 0.009107468 | 0.022565638 | -0.2539553 | -1.39377876 | 152 | D4_G6 |
| GO_GLIAL_CELL_DEVELOPMENT                                                | Development | 0.011355034 | 0.027098824 | -0.2727072 | -1.39875318 | 93  | D4_G6 |
| GO_POSITIVE_REGULATION_OF_CELL_MORPHOGENESIS_INVOLVED_IN_DIFFERENTIATION | Development | 0.00591716  | 0.01598455  | -0.2438658 | -1.42870005 | 238 | D4_G6 |
| GO_AXIS_SPECIFICATION                                                    | Development | 0.004659832 | 0.013328491 | -0.2755149 | -1.44033903 | 106 | D4_G6 |
| GO_REGULATION_OF_GASTRULATION                                            | Development | 0.018412439 | 0.041401379 | -0.3185922 | -1.45469459 | 53  | D4_G6 |
| GO_BONE_DEVELOPMENT                                                      | Development | 0.003773585 | 0.01227904  | -0.2548797 | -1.45702361 | 205 | D4_G6 |
| GO_POSITIVE_REGULATION_OF_EPITHELIAL_TO_MESENCHYMAL_TRANSITION           | Development | 0.014048531 | 0.03252904  | -0.3155386 | -1.46089493 | 56  | D4_G6 |
| GO_THYMUS_DEVELOPMENT                                                    | Development | 0.015445939 | 0.035343943 | -0.3050694 | -1.46438492 | 65  | D4_G6 |
| GO_AORTA_DEVELOPMENT                                                     | Development | 0.006661732 | 0.017276092 | -0.2876155 | -1.46786602 | 91  | D4_G6 |
| GO_OUTFLOW_TRACT_MORPHOGENESIS                                           | Development | 0.009369144 | 0.02306707  | -0.2956715 | -1.46977782 | 79  | D4_G6 |
| GO_NEGATIVE_REGULATION_OF_EMBRYONIC_DEVELOPMENT                          | Development | 0.017363852 | 0.039270571 | -0.3262551 | -1.48101008 | 51  | D4_G6 |
| GO_HINDLIMB_MORPHOGENESIS                                                | Development | 0.022822244 | 0.04904891  | -0.3477337 | -1.49339328 | 40  | D4_G6 |

|                                                         |             |             |             |            |             |     |       |
|---------------------------------------------------------|-------------|-------------|-------------|------------|-------------|-----|-------|
| GO_EMBRYONIC_DIGESTIVE_TRACT_DEVELOPMENT                | Development | 0.022787318 | 0.04904891  | -0.3441244 | -1.49728415 | 42  | D4_G6 |
| GO_SOMITE_DEVELOPMENT                                   | Development | 0.001885014 | 0.007843578 | -0.2868025 | -1.49989058 | 107 | D4_G6 |
| GO_DENDRITIC_SPINE_DEVELOPMENT                          | Development | 0.022404544 | 0.04904891  | -0.3535424 | -1.50611026 | 39  | D4_G6 |
| GO_MESODERM_MORPHOGENESIS                               | Development | 0.004542014 | 0.013284536 | -0.2944923 | -1.51049206 | 93  | D4_G6 |
| GO_POSITIVE_REGULATION_OF_STEM_CELL_PROLIFERATION       | Development | 0.006265664 | 0.016694133 | -0.3023437 | -1.51128616 | 80  | D4_G6 |
| GO_CEREBRAL_CORTEX_DEVELOPMENT                          | Development | 0.002016129 | 0.008002798 | -0.2720182 | -1.51685964 | 163 | D4_G6 |
| GO_EMBRYONIC_PATTERN_SPECIFICATION                      | Development | 0.006443299 | 0.016821767 | -0.3041908 | -1.51725901 | 81  | D4_G6 |
| GO_MAMMARY_GLAND_DUCT_MORPHOGENESIS                     | Development | 0.012461059 | 0.029557025 | -0.3370856 | -1.51829801 | 50  | D4_G6 |
| GO_CARDIAC_CHAMBER_MORPHOGENESIS                        | Development | 0.001689189 | 0.007466984 | -0.2786416 | -1.52880962 | 148 | D4_G6 |
| GO_GASTRULATION                                         | Development | 0.003144654 | 0.011020454 | -0.2702362 | -1.53498556 | 195 | D4_G6 |
| GO_POST_ANAL_TAIL_MORPHOGENESIS                         | Development | 0.022638092 | 0.04904891  | -0.3694868 | -1.53886542 | 36  | D4_G6 |
| GO_REGULATION_OF_HEART_MORPHOGENESIS                    | Development | 0.02267231  | 0.04904891  | -0.3658007 | -1.5400016  | 37  | D4_G6 |
| GO_CRANIAL_SKELETAL_SYSTEM_DEVELOPMENT                  | Development | 0.004719764 | 0.013401374 | -0.3170308 | -1.55584173 | 75  | D4_G6 |
| GO_CARDIAC_SEPTUM_DEVELOPMENT                           | Development | 0.001253133 | 0.006770398 | -0.2903259 | -1.56161519 | 127 | D4_G6 |
| GO_PANCREAS_DEVELOPMENT                                 | Development | 0.003272251 | 0.011269091 | -0.3130211 | -1.56431144 | 82  | D4_G6 |
| GO_REGULATION_OF_KIDNEY_DEVELOPMENT                     | Development | 0.005108557 | 0.013994568 | -0.3387051 | -1.56815246 | 56  | D4_G6 |
| GO_EXOCRINE_SYSTEM_DEVELOPMENT                          | Development | 0.007014467 | 0.018070383 | -0.3369611 | -1.57144868 | 58  | D4_G6 |
| GO_CARDIAC_CHAMBER_DEVELOPMENT                          | Development | 0.004115226 | 0.012704945 | -0.2753751 | -1.58302642 | 213 | D4_G6 |
| GO_EPITHELIAL_TO_MESENCHYMAL_TRANSITION                 | Development | 0.004002287 | 0.012657639 | -0.3230728 | -1.58396803 | 74  | D4_G6 |
| GO_REGULATION_OF_EPITHELIAL_TO_MESENCHYMAL_TRANSITION   | Development | 0.001132503 | 0.006770398 | -0.2972536 | -1.5857988  | 120 | D4_G6 |
| GO_REGULATION_OF_GLIAL_CELL_DIFFERENTIATION             | Development | 0.001249219 | 0.006770398 | -0.3204183 | -1.5927939  | 79  | D4_G6 |
| GO_EMBRYONIC_FORELIMB_MORPHOGENESIS                     | Development | 0.018744675 | 0.041906198 | -0.3933359 | -1.60003521 | 33  | D4_G6 |
| GO_GLOMERULUS_DEVELOPMENT                               | Development | 0.003997716 | 0.012657639 | -0.3291477 | -1.60069939 | 72  | D4_G6 |
| GO_EMBRYONIC_CAMERA_TYPE_EYE_DEVELOPMENT                | Development | 0.005319149 | 0.014469573 | -0.3519422 | -1.60697082 | 53  | D4_G6 |
| GO_NEURAL_TUBE_DEVELOPMENT                              | Development | 0.004329004 | 0.01285483  | -0.2783761 | -1.60722359 | 219 | D4_G6 |
| GO_EMBRYONIC_CAMERA_TYPE_EYE_MORPHOGENESIS              | Development | 0.009964642 | 0.024378903 | -0.3767635 | -1.61806607 | 40  | D4_G6 |
| GO_MAMMARY_GLAND_EPITHELIUM_DEVELOPMENT                 | Development | 0.001308901 | 0.006788831 | -0.3239645 | -1.61900049 | 82  | D4_G6 |
| GO_MESODERM_DEVELOPMENT                                 | Development | 0.001506024 | 0.007205928 | -0.2987099 | -1.62468368 | 139 | D4_G6 |
| GO_NEGATIVE_REGULATION_OF_VASCULATURE_DEVELOPMENT       | Development | 0.000748503 | 0.006770398 | -0.3177368 | -1.62617592 | 92  | D4_G6 |
| GO_NERVE_DEVELOPMENT                                    | Development | 0.000980392 | 0.006770398 | -0.3132984 | -1.63416639 | 108 | D4_G6 |
| GO_NEURAL_TUBE_PATTERNING                               | Development | 0.004484305 | 0.013215111 | -0.3671998 | -1.63849235 | 48  | D4_G6 |
| GO_REGULATION_OF_CHONDROCYTE_DIFFERENTIATION            | Development | 0.00381971  | 0.012279893 | -0.3663451 | -1.64357953 | 49  | D4_G6 |
| GO_PALLIUM_DEVELOPMENT                                  | Development | 0.00617284  | 0.016560238 | -0.2822271 | -1.64933669 | 241 | D4_G6 |
| GO_REGULATION_OF_OLIGODENDROCYTE_DIFFERENTIATION        | Development | 0.011262596 | 0.027098824 | -0.4002956 | -1.65582516 | 35  | D4_G6 |
| GO_GLAND_MORPHOGENESIS                                  | Development | 0.001253133 | 0.006770398 | -0.3079232 | -1.65626849 | 127 | D4_G6 |
| GO_OLIGODENDROCYTE_DEVELOPMENT                          | Development | 0.006395153 | 0.016808882 | -0.3790309 | -1.65697932 | 43  | D4_G6 |
| GO_POSITIVE_REGULATION_OF_OSTEOLAST_DIFFERENTIATION     | Development | 0.003037975 | 0.010743383 | -0.3459693 | -1.66700998 | 66  | D4_G6 |
| GO_ENDOCARDIAL_CUSHION_DEVELOPMENT                      | Development | 0.00422982  | 0.012755039 | -0.3795138 | -1.67105615 | 45  | D4_G6 |
| GO_POSITIVE_REGULATION_OF_KIDNEY_DEVELOPMENT            | Development | 0.004287599 | 0.012829815 | -0.392348  | -1.69316033 | 41  | D4_G6 |
| GO_EMBRYONIC_CRANIAL_SKELETON_MORPHOGENESIS             | Development | 0.002968827 | 0.010693276 | -0.3549366 | -1.69641049 | 64  | D4_G6 |
| GO_LENS_FIBER_CELL_DIFFERENTIATION                      | Development | 0.006311139 | 0.016700906 | -0.3982734 | -1.6966671  | 39  | D4_G6 |
| GO_LUNG_ALVEOLUS_DEVELOPMENT                            | Development | 0.003504673 | 0.011752739 | -0.3773608 | -1.69970528 | 50  | D4_G6 |
| GO_NEGATIVE_REGULATION_OF_DEVELOPMENTAL_GROWTH          | Development | 0.000942507 | 0.006770398 | -0.3250129 | -1.69971929 | 107 | D4_G6 |
| GO_GLANDULAR_EPITHELIAL_CELL_DIFFERENTIATION            | Development | 0.002873563 | 0.010446879 | -0.3851742 | -1.70705632 | 46  | D4_G6 |
| GO_DIGESTIVE_SYSTEM_DEVELOPMENT                         | Development | 0.003003003 | 0.010717139 | -0.3017701 | -1.71022603 | 189 | D4_G6 |
| GO_GLIAL_CELL_DIFFERENTIATION                           | Development | 0.002277904 | 0.008602959 | -0.3071342 | -1.72119046 | 171 | D4_G6 |
| GO_NEURAL_RETINA_DEVELOPMENT                            | Development | 0.001518987 | 0.007205928 | -0.357675  | -1.72341214 | 66  | D4_G6 |
| GO_POSITIVE_REGULATION_OF_BIOMINERAL_TISSUE_DEVELOPMENT | Development | 0.007887818 | 0.019924423 | -0.4211084 | -1.72584836 | 34  | D4_G6 |
| GO_CHONDROCYTE_DIFFERENTIATION                          | Development | 0.000595238 | 0.006770398 | -0.3505849 | -1.72726851 | 76  | D4_G6 |
| GO_ARTERY_DEVELOPMENT                                   | Development | 0.001278772 | 0.006788831 | -0.32131   | -1.73104275 | 128 | D4_G6 |
| GO_REGULATION_OF_STEM_CELL_PROLIFERATION                | Development | 0.000942507 | 0.006770398 | -0.3315613 | -1.73396564 | 107 | D4_G6 |
| GO_OSTEOCLAST_DIFFERENTIATION                           | Development | 0.00330251  | 0.011269091 | -0.4000134 | -1.74045691 | 42  | D4_G6 |



|                                                          |             |             |             |            |             |     |       |
|----------------------------------------------------------|-------------|-------------|-------------|------------|-------------|-----|-------|
| GO_CARDIAC_EPITHELIAL_TO_MESENCHYMAL_TRANSITION          | Development | 0.009020619 | 0.022493722 | -0.4435882 | -1.74925616 | 29  | D4_G6 |
| GO_ENDOCRINE_SYSTEM_DEVELOPMENT                          | Development | 0.001297017 | 0.006788831 | -0.3259405 | -1.75410298 | 129 | D4_G6 |
| GO_POSITIVE_REGULATION_OF_MESENCHYMAL_CELL_PROLIFERATION | Development | 0.001383604 | 0.006926638 | -0.4007681 | -1.75763391 | 44  | D4_G6 |
| GO_METANEPHROS_MORPHOGENESIS                             | Development | 0.007332971 | 0.018740666 | -0.4390586 | -1.7602742  | 31  | D4_G6 |
| GO_POSITIVE_REGULATION_OF_STEM_CELL_DIFFERENTIATION      | Development | 0.001094092 | 0.006770398 | -0.361624  | -1.76051607 | 71  | D4_G6 |
| GO_RETINA_VASCULATURE_DEVELOPMENT_IN_CAMERA_TYPE_EYE     | Development | 0.00362757  | 0.012060894 | -0.4184372 | -1.76159815 | 37  | D4_G6 |
| GO_OLFACTORY_LOBE_DEVELOPMENT                            | Development | 0.001636661 | 0.007317945 | -0.3893146 | -1.77761393 | 53  | D4_G6 |
| GO_SMOOTH_MUSCLE_TISSUE_DEVELOPMENT                      | Development | 0.002208899 | 0.008456154 | -0.4181295 | -1.78125525 | 39  | D4_G6 |
| GO_RETINA_MORPHOGENESIS_IN_CAMERA_TYPE_EYE               | Development | 0.000909918 | 0.006770398 | -0.3808846 | -1.79098567 | 60  | D4_G6 |
| GO_REGULATION_OF_MESENCHYMAL_CELL_PROLIFERATION          | Development | 0.00159109  | 0.00730736  | -0.3935019 | -1.79448292 | 52  | D4_G6 |
| GO_DEVELOPMENTAL_GROWTH_INVOLVED_IN_MORPHOGENESIS        | Development | 0.001481481 | 0.007203704 | -0.3303798 | -1.79781712 | 138 | D4_G6 |
| GO_REGULATION_OF_ASTROCYTE_DIFFERENTIATION               | Development | 0.0016072   | 0.00730736  | -0.4200862 | -1.80412186 | 40  | D4_G6 |
| GO_SKIN_EPIDERMIS_DEVELOPMENT                            | Development | 0.000595238 | 0.006770398 | -0.3667457 | -1.80689022 | 76  | D4_G6 |
| GO_DEVELOPMENTAL_CELL_GROWTH                             | Development | 0.000888099 | 0.006770398 | -0.3501523 | -1.82736476 | 103 | D4_G6 |
| GO_DIGESTIVE_TRACT_MORPHOGENESIS                         | Development | 0.000568505 | 0.006770398 | -0.3742788 | -1.83058056 | 73  | D4_G6 |
| GO_EMBRYONIC_EYE_MORPHOGENESIS                           | Development | 0.001168224 | 0.006770398 | -0.4070244 | -1.8333157  | 50  | D4_G6 |
| GO_HIPPOCAMPUS_DEVELOPMENT                               | Development | 0.000942507 | 0.006770398 | -0.3513519 | -1.83746451 | 107 | D4_G6 |
| GO_HEART TRABECULA MORPHOGENESIS                         | Development | 0.004073873 | 0.012677892 | -0.4591645 | -1.84088246 | 31  | D4_G6 |
| GO_LIMBIC_SYSTEM_DEVELOPMENT                             | Development | 0.001567398 | 0.00730736  | -0.3379869 | -1.8464654  | 142 | D4_G6 |
| GO_OSTEOBLAST_DIFFERENTIATION                            | Development | 0.00255102  | 0.009469712 | -0.3292715 | -1.85120339 | 177 | D4_G6 |
| GO_VENTRICULAR_SEPTUM_DEVELOPMENT                        | Development | 0.000537634 | 0.006770398 | -0.3819466 | -1.85875467 | 70  | D4_G6 |
| GO_LENS_DEVELOPMENT_IN_CAMERA_TYPE_EYE                   | Development | 0.00064433  | 0.006770398 | -0.3728678 | -1.85980978 | 81  | D4_G6 |
| GO_THYROID_GLAND_DEVELOPMENT                             | Development | 0.003455084 | 0.011687197 | -0.4839222 | -1.86678898 | 27  | D4_G6 |
| GO_APPENDAGE_DEVELOPMENT                                 | Development | 0.004651163 | 0.013328491 | -0.3214503 | -1.87641958 | 223 | D4_G6 |
| GO_LIMB_DEVELOPMENT                                      | Development | 0.004651163 | 0.013328491 | -0.3214503 | -1.87641958 | 223 | D4_G6 |
| GO_BONE_MORPHOGENESIS                                    | Development | 0.000782473 | 0.006770398 | -0.3643526 | -1.87771642 | 95  | D4_G6 |
| GO_SKELETAL_MUSCLE_CELL_DIFFERENTIATION                  | Development | 0.000438404 | 0.006770398 | -0.403202  | -1.88036902 | 58  | D4_G6 |
| GO_PROXIMAL_DISTAL_PATTERN_FORMATION                     | Development | 0.002556092 | 0.009469712 | -0.4638809 | -1.88700234 | 33  | D4_G6 |
| GO_MORPHOGENESIS_OF_AN_EPITHELIAL_SHEET                  | Development | 0.000613874 | 0.006770398 | -0.3802519 | -1.88754178 | 78  | D4_G6 |
| GO_ARTERY_MORPHOGENESIS                                  | Development | 0.00064433  | 0.006770398 | -0.3797855 | -1.89431434 | 81  | D4_G6 |
| GO_SMOOTH_MUSCLE_CELL_DIFFERENTIATION                    | Development | 0.001249219 | 0.006770398 | -0.4495145 | -1.90042925 | 38  | D4_G6 |
| GO_STEM_CELL_DIFFERENTIATION                             | Development | 0.004761905 | 0.01342305  | -0.3264141 | -1.90085632 | 224 | D4_G6 |
| GO_EYE_MORPHOGENESIS                                     | Development | 0.003278689 | 0.011269091 | -0.3358531 | -1.90601583 | 197 | D4_G6 |
| GO_AORTA_MORPHOGENESIS                                   | Development | 0.001145913 | 0.006770398 | -0.4255973 | -1.90940974 | 49  | D4_G6 |
| GO_DIENCEPHALON_DEVELOPMENT                              | Development | 0.00081367  | 0.006770398 | -0.370786  | -1.91828786 | 97  | D4_G6 |
| GO_DENDRITE_DEVELOPMENT                                  | Development | 0.001375516 | 0.006926638 | -0.3549243 | -1.92687547 | 134 | D4_G6 |
| GO_FORELIMB_MORPHOGENESIS                                | Development | 0.001249219 | 0.006770398 | -0.455828  | -1.92712118 | 38  | D4_G6 |
| GO_CORPUS_CALLOSUM_DEVELOPMENT                           | Development | 0.002745196 | 0.010074351 | -0.4936209 | -1.92967267 | 28  | D4_G6 |
| GO_MORPHOGENESIS_OF_A_BRANCHING_STRUCTURE                | Development | 0.004926108 | 0.013590469 | -0.3296413 | -1.92985854 | 229 | D4_G6 |
| GO_ENDOCARDIAL_CUSHION_MORPHOGENESIS                     | Development | 0.002113048 | 0.008219757 | -0.4869593 | -1.93968368 | 30  | D4_G6 |
| GO_CRANIAL_NERVE_DEVELOPMENT                             | Development | 0.000613874 | 0.006770398 | -0.3907728 | -1.93976681 | 78  | D4_G6 |
| GO_CAMERA_TYPE_EYE_MORPHOGENESIS                         | Development | 0.001615509 | 0.00730736  | -0.3554096 | -1.94509735 | 145 | D4_G6 |
| GO_METANEPHRIC_NEPHRON_DEVELOPMENT                       | Development | 0.001901141 | 0.007843578 | -0.4887854 | -1.95963875 | 31  | D4_G6 |
| GO_CHONDROCYTE_DEVELOPMENT                               | Development | 0.000906892 | 0.006770398 | -0.4661164 | -1.96232516 | 37  | D4_G6 |
| GO_CENTRAL_NERVOUS_SYSTEM_NEURON_DEVELOPMENT             | Development | 0.001203369 | 0.006770398 | -0.3654016 | -1.96371638 | 124 | D4_G6 |
| GO_MESENCHYME_DEVELOPMENT                                | Development | 0.004065041 | 0.012677892 | -0.3418134 | -1.97058213 | 215 | D4_G6 |
| GO_CARDIAC_SEPTUM_MORPHOGENESIS                          | Development | 0.000459137 | 0.006770398 | -0.4169653 | -1.97312389 | 61  | D4_G6 |
| GO_COCHLEA_MORPHOGENESIS                                 | Development | 0.001955854 | 0.007843578 | -0.489838  | -1.97739457 | 32  | D4_G6 |
| GO_BONE TRABECULA MORPHOGENESIS                          | Development | 0.001955854 | 0.007843578 | -0.4934245 | -1.99187279 | 32  | D4_G6 |
| GO_REGULATION_OF_CARTILAGE_DEVELOPMENT                   | Development | 0.000494805 | 0.006770398 | -0.4194287 | -2.00464893 | 64  | D4_G6 |
| GO_FOREBRAIN_NEURON_DEVELOPMENT                          | Development | 0.000445038 | 0.006770398 | -0.427945  | -2.00585535 | 59  | D4_G6 |
| GO_PATTERNING_OF_BLOOD_VESSELS                           | Development | 0.000514933 | 0.006770398 | -0.4157829 | -2.01174912 | 67  | D4_G6 |

|                                                                      |             |             |             |            |             |     |       |
|----------------------------------------------------------------------|-------------|-------------|-------------|------------|-------------|-----|-------|
| GO_PARASYMPATHETIC_NERVOUS_SYSTEM_DEVELOPMENT                        | Development | 0.001117631 | 0.006770398 | -0.4984747 | -2.0122593  | 32  | D4_G6 |
| GO_HEART_VALVE_DEVELOPMENT                                           | Development | 0.00032144  | 0.006770398 | -0.469626  | -2.01687753 | 40  | D4_G6 |
| GO_LENS_MORPHOGENESIS_IN_CAMERA_TYPE_EYE                             | Development | 0.000876424 | 0.006770398 | -0.4924683 | -2.01830593 | 34  | D4_G6 |
| GO_CONNECTIVE_TISSUE_DEVELOPMENT                                     | Development | 0.004201681 | 0.012755039 | -0.3536661 | -2.0296285  | 211 | D4_G6 |
| GO_ANTERIOR_POSTERIOR_PATTERN_SPECIFICATION                          | Development | 0.004878049 | 0.013590469 | -0.3478186 | -2.03013443 | 228 | D4_G6 |
| GO_OSTEOBLAST_DEVELOPMENT                                            | Development | 0.000958773 | 0.006770398 | -0.5401276 | -2.03204842 | 25  | D4_G6 |
| GO_CARTILAGE_DEVELOPMENT_INVOLVED_IN_ENDOCHONDRAL_BONE_MORPHOGENESIS | Development | 0.000987167 | 0.006770398 | -0.5282307 | -2.0377146  | 27  | D4_G6 |
| GO_SKELETAL_SYSTEM_MORPHOGENESIS                                     | Development | 0.004201681 | 0.012755039 | -0.3530483 | -2.04265867 | 218 | D4_G6 |
| GO_ENDOCHONDRAL_BONE_MORPHOGENESIS                                   | Development | 0.000425713 | 0.006770398 | -0.4434878 | -2.05328035 | 56  | D4_G6 |
| GO_CELL_FATE_COMMITMENT                                              | Development | 0.004926108 | 0.013590469 | -0.3516573 | -2.05874971 | 229 | D4_G6 |
| GO_PALATE_DEVELOPMENT                                                | Development | 0.00122549  | 0.006770398 | -0.3827531 | -2.0590952  | 125 | D4_G6 |
| GO_NEURAL_CREST_CELL_DIFFERENTIATION                                 | Development | 0.000748503 | 0.006770398 | -0.4076537 | -2.0863704  | 92  | D4_G6 |
| GO_MIDDLE_EAR_MORPHOGENESIS                                          | Development | 0.000731172 | 0.006770398 | -0.5493154 | -2.08976373 | 26  | D4_G6 |
| GO_MESENCHYMAL_CELL_DIFFERENTIATION                                  | Development | 0.002057613 | 0.008084965 | -0.3760559 | -2.09234088 | 162 | D4_G6 |
| GO_NOTOCHORD_DEVELOPMENT                                             | Development | 0.000352485 | 0.006770398 | -0.4759586 | -2.09571727 | 45  | D4_G6 |
| GO_BRANCHING_MORPHOGENESIS_OF_AN_EPITHELIAL_TUBE                     | Development | 0.003703704 | 0.012209667 | -0.3669218 | -2.10298649 | 203 | D4_G6 |
| GO_MESONEPHROS_DEVELOPMENT                                           | Development | 0.000888099 | 0.006770398 | -0.402974  | -2.10302914 | 103 | D4_G6 |
| GO_INNER_EAR_MORPHOGENESIS                                           | Development | 0.001727116 | 0.007548854 | -0.383454  | -2.10393479 | 149 | D4_G6 |
| GO TRABECULA MORPHOGENESIS                                           | Development | 0.000514933 | 0.006770398 | -0.4349237 | -2.10436076 | 67  | D4_G6 |
| GO_DENDRITE_MORPHOGENESIS                                            | Development | 0.00062461  | 0.006770398 | -0.4283652 | -2.12939625 | 79  | D4_G6 |
| GO_MESENCHYME_MORPHOGENESIS                                          | Development | 0.000366838 | 0.006770398 | -0.4792182 | -2.13145752 | 47  | D4_G6 |
| GO_PERICARDIUM_DEVELOPMENT                                           | Development | 0.000731172 | 0.006770398 | -0.5608436 | -2.13362046 | 26  | D4_G6 |
| GO_OTIC_VESICLE_DEVELOPMENT                                          | Development | 0.000584283 | 0.006770398 | -0.527152  | -2.16045142 | 34  | D4_G6 |
| GO_SYMPATHETIC_NERVOUS_SYSTEM_DEVELOPMENT                            | Development | 0.000905524 | 0.006770398 | -0.5253425 | -2.18798423 | 36  | D4_G6 |
| GO_CARTILAGE_DEVELOPMENT                                             | Development | 0.001872659 | 0.007843578 | -0.3982051 | -2.19408481 | 155 | D4_G6 |
| GO_OLIGODENDROCYTE_DIFFERENTIATION                                   | Development | 0.00062461  | 0.006770398 | -0.4439874 | -2.20705369 | 79  | D4_G6 |
| GO_KIDNEY_EPITHELIUM_DEVELOPMENT                                     | Development | 0.001919386 | 0.007843578 | -0.3975159 | -2.20864626 | 158 | D4_G6 |
| GO_CELL_FATE_SPECIFICATION                                           | Development | 0.00064433  | 0.006770398 | -0.4433529 | -2.21137921 | 81  | D4_G6 |
| GO_NEPHRON_EPITHELIUM_DEVELOPMENT                                    | Development | 0.001035197 | 0.006770398 | -0.4227926 | -2.21631635 | 111 | D4_G6 |
| GO_BRANCHING_INVOLVED_IN_URETERIC_BUD_MORPHOGENESIS                  | Development | 0.000425713 | 0.006770398 | -0.4804393 | -2.22436006 | 56  | D4_G6 |
| GO_REGULATION_OF_OSTEOBLAST_DIFFERENTIATION                          | Development | 0.001388889 | 0.006926638 | -0.4114053 | -2.22714345 | 133 | D4_G6 |
| GO_VENTRICULAR_SEPTUM_MORPHOGENESIS                                  | Development | 0.00062461  | 0.006770398 | -0.5279607 | -2.23207928 | 38  | D4_G6 |
| GO_NEGATIVE_REGULATION_OF_OSTEOBLAST_DIFFERENTIATION                 | Development | 0.000394633 | 0.006770398 | -0.4933954 | -2.23973057 | 51  | D4_G6 |
| GO_COCHLEA_DEVELOPMENT                                               | Development | 0.000459137 | 0.006770398 | -0.4768063 | -2.25629758 | 61  | D4_G6 |
| GO_POSITIVE_REGULATION_OF_CARTILAGE_DEVELOPMENT                      | Development | 0.000271592 | 0.006770398 | -0.5629245 | -2.25687716 | 31  | D4_G6 |
| GO_NEPHRON_DEVELOPMENT                                               | Development | 0.001782531 | 0.007704496 | -0.4131031 | -2.26255665 | 151 | D4_G6 |
| GO_EAR_MORPHOGENESIS                                                 | Development | 0.002217295 | 0.008456154 | -0.4080501 | -2.28103943 | 169 | D4_G6 |
| GO_SPINAL_CORD_MOTOR_NEURON_DIFFERENTIATION                          | Development | 0.000352485 | 0.006770398 | -0.5205123 | -2.29189372 | 45  | D4_G6 |
| GO_MESONEPHRIC_TUBULE_MORPHOGENESIS                                  | Development | 0.000467727 | 0.006770398 | -0.4981703 | -2.36999568 | 62  | D4_G6 |
| GO_DORSAL_VENTRAL_PATTERN_FORMATION                                  | Development | 0.001081081 | 0.006770398 | -0.4478696 | -2.3711267  | 116 | D4_G6 |
| GO_AUTONOMIC_NERVOUS_SYSTEM_DEVELOPMENT                              | Development | 0.000438404 | 0.006770398 | -0.5122257 | -2.38881084 | 58  | D4_G6 |
| GO_EMBRYONIC_SKELETAL_SYSTEM_DEVELOPMENT                             | Development | 0.001879699 | 0.007843578 | -0.4363513 | -2.4009543  | 154 | D4_G6 |
| GO_EMBRYONIC_SKELETAL_SYSTEM_MORPHOGENESIS                           | Development | 0.001132503 | 0.006770398 | -0.4519965 | -2.41132654 | 120 | D4_G6 |
| GO_CRANIAL_NERVE_MORPHOGENESIS                                       | Development | 0.000373692 | 0.006770398 | -0.5420315 | -2.41861325 | 48  | D4_G6 |
| GO_NEURON_FATE_SPECIFICATION                                         | Development | 0.000296384 | 0.006770398 | -0.5937086 | -2.4587921  | 35  | D4_G6 |
| GO_SPINAL_CORD_PATTERNING                                            | Development | 0.000264131 | 0.006770398 | -0.6167076 | -2.45650423 | 30  | D4_G6 |
| GO_KIDNEY_MORPHOGENESIS                                              | Development | 0.000740192 | 0.006770398 | -0.4927361 | -2.51471393 | 91  | D4_G6 |
| GO_METANEPHROS_DEVELOPMENT                                           | Development | 0.000683527 | 0.006770398 | -0.5010399 | -2.51836929 | 85  | D4_G6 |
| GO_VENTRAL_SPINAL_CORD_DEVELOPMENT                                   | Development | 0.000459137 | 0.006770398 | -0.5327883 | -2.52121048 | 61  | D4_G6 |
| GO_RENAL_TUBULE_DEVELOPMENT                                          | Development | 0.000999001 | 0.006770398 | -0.4919979 | -2.57139657 | 109 | D4_G6 |
| GO_NEURON_FATE_COMMITMENT                                            | Development | 0.000607903 | 0.006770398 | -0.5215611 | -2.57837122 | 77  | D4_G6 |
| GO_SPINAL_CORD_DEVELOPMENT                                           | Development | 0.001481481 | 0.007203704 | -0.4787962 | -2.60544999 | 138 | D4_G6 |

|                                                                          |             |             |             |            |             |     |       |
|--------------------------------------------------------------------------|-------------|-------------|-------------|------------|-------------|-----|-------|
| GO_CELL_DIFFERENTIATION_IN_SPINAL_CORD                                   | Development | 0.000529942 | 0.006770398 | -0.5431976 | -2.63996275 | 69  | D4_G6 |
| GO_CELL_DIFFERENTIATION_IN_HINDBRAIN                                     | Development | 5.71E-05    | 0.000888889 | 0.76107478 | 2.129628666 | 34  | D4_G7 |
| GO_NEURAL_RETINA_DEVELOPMENT                                             | Development | 5.27E-05    | 0.000888889 | 0.67777387 | 2.050803937 | 66  | D4_G7 |
| GO_AUTONOMIC_NERVOUS_SYSTEM_DEVELOPMENT                                  | Development | 5.34E-05    | 0.000888889 | 0.67044324 | 2.000758671 | 58  | D4_G7 |
| GO_SPINAL_CORD_DEVELOPMENT                                               | Development | 5.03E-05    | 0.000888889 | 0.62671497 | 1.987799675 | 138 | D4_G7 |
| GO_CELL_DIFFERENTIATION_IN_SPINAL_CORD                                   | Development | 5.24E-05    | 0.000888889 | 0.63486786 | 1.92932343  | 69  | D4_G7 |
| GO_CRANIAL_NERVE_DEVELOPMENT                                             | Development | 5.19E-05    | 0.000888889 | 0.62903844 | 1.929171933 | 78  | D4_G7 |
| GO_SYMPATHETIC_NERVOUS_SYSTEM_DEVELOPMENT                                | Development | 0.000169799 | 0.002064113 | 0.67750323 | 1.91084579  | 36  | D4_G7 |
| GO_VENTRAL_SPINAL_CORD_DEVELOPMENT                                       | Development | 5.31E-05    | 0.000888889 | 0.63422307 | 1.903146518 | 61  | D4_G7 |
| GO_NEUROMUSCULAR_JUNCTION_DEVELOPMENT                                    | Development | 5.33E-05    | 0.000888889 | 0.62971574 | 1.883550442 | 59  | D4_G7 |
| GO_NEURON_FATE_SPECIFICATION                                             | Development | 5.69E-05    | 0.000888889 | 0.67012341 | 1.881979576 | 35  | D4_G7 |
| GO_CRANIAL_NERVE_MORPHOGENESIS                                           | Development | 0.000218269 | 0.00246943  | 0.64174298 | 1.876344784 | 48  | D4_G7 |
| GO_REGULATION_OF_DENDRITE_DEVELOPMENT                                    | Development | 5.01E-05    | 0.000888889 | 0.58407384 | 1.868948197 | 178 | D4_G7 |
| GO_PHOTORECEPTOR_CELL_DIFFERENTIATION                                    | Development | 5.38E-05    | 0.000888889 | 0.62737667 | 1.860693222 | 55  | D4_G7 |
| GO_NERVE_DEVELOPMENT                                                     | Development | 5.07E-05    | 0.000888889 | 0.59274396 | 1.860398469 | 108 | D4_G7 |
| GO_PERIPHERAL_NERVOUS_SYSTEM_DEVELOPMENT                                 | Development | 5.16E-05    | 0.000888889 | 0.6027299  | 1.857732316 | 83  | D4_G7 |
| GO_PHOTORECEPTOR_CELL_DEVELOPMENT                                        | Development | 0.000222185 | 0.00246943  | 0.64488521 | 1.852652748 | 41  | D4_G7 |
| GO_EYE_PHOTORECEPTOR_CELL_DIFFERENTIATION                                | Development | 0.000325892 | 0.003336106 | 0.62555222 | 1.8370814   | 50  | D4_G7 |
| GO_CEREBELLAR_PURKINJE_CELL_LAYER_MORPHOGENESIS                          | Development | 0.000713479 | 0.005905176 | 0.68309572 | 1.832544185 | 26  | D4_G7 |
| GO_DENDRITE_MORPHOGENESIS                                                | Development | 5.19E-05    | 0.000888889 | 0.59608758 | 1.83062563  | 79  | D4_G7 |
| GO_NEGATIVE_REGULATION_OF_CELL_MORPHOGENESIS_INVOLVED_IN_DIFFERENTIATION | Development | 5.01E-05    | 0.000888889 | 0.57027903 | 1.823573476 | 175 | D4_G7 |
| GO_COCHLEA_DEVELOPMENT                                                   | Development | 0.000159312 | 0.001999106 | 0.60769812 | 1.823551703 | 61  | D4_G7 |
| GO_CEREBELLAR_CORTEX_MORPHOGENESIS                                       | Development | 0.000325892 | 0.003336106 | 0.6205312  | 1.822335992 | 50  | D4_G7 |
| GO_SPINAL_CORD_MOTOR_NEURON_DIFFERENTIATION                              | Development | 0.000220058 | 0.00246943  | 0.62763354 | 1.821643697 | 45  | D4_G7 |
| GO_EYE_PHOTORECEPTOR_CELL_DEVELOPMENT                                    | Development | 0.000452796 | 0.004403441 | 0.64317636 | 1.814029516 | 36  | D4_G7 |
| GO_PARASYMPATHETIC_NERVOUS_SYSTEM_DEVELOPMENT                            | Development | 0.000634042 | 0.005582784 | 0.65213898 | 1.808414813 | 32  | D4_G7 |
| GO_DENDRITE_DEVELOPMENT                                                  | Development | 5.04E-05    | 0.000888889 | 0.57048879 | 1.807711939 | 134 | D4_G7 |
| GO_CELL_FATE_SPECIFICATION                                               | Development | 0.000103622 | 0.001389958 | 0.57911151 | 1.780535987 | 81  | D4_G7 |
| GO_REGULATION_OF_DENDRITIC_SPINE_DEVELOPMENT                             | Development | 0.000102249 | 0.001389958 | 0.57030622 | 1.774226572 | 94  | D4_G7 |
| GO_NEGATIVE_REGULATION_OF_DEVELOPMENTAL_GROWTH                           | Development | 5.07E-05    | 0.000888889 | 0.56352564 | 1.768115198 | 107 | D4_G7 |
| GO_NEGATIVE_REGULATION_OF_DENDRITE_DEVELOPMENT                           | Development | 0.000660175 | 0.005582784 | 0.60888364 | 1.767223997 | 45  | D4_G7 |
| GO_METENCEPHALON_DEVELOPMENT                                             | Development | 5.02E-05    | 0.000888889 | 0.55352672 | 1.763401261 | 156 | D4_G7 |
| GO_RETINA_DEVELOPMENT_IN_CAMERA_TYPE_EYE                                 | Development | 5.01E-05    | 0.000888889 | 0.54819324 | 1.755061251 | 181 | D4_G7 |
| GO_REGULATION_OF_DENDRITE_MORPHOGENESIS                                  | Development | 5.07E-05    | 0.000888889 | 0.55626348 | 1.747985738 | 111 | D4_G7 |
| GO_RETINA_MORPHOGENESIS_IN_CAMERA_TYPE_EYE                               | Development | 0.000585231 | 0.005294298 | 0.58194251 | 1.743017003 | 60  | D4_G7 |
| GO_CENTRAL_NERVOUS_SYSTEM_NEURON_DEVELOPMENT                             | Development | 5.05E-05    | 0.000888889 | 0.55071606 | 1.740165663 | 124 | D4_G7 |
| GO_POSITIVE_REGULATION_OF_DENDRITE_DEVELOPMENT                           | Development | 0.000152804 | 0.001981358 | 0.55577398 | 1.736772615 | 101 | D4_G7 |
| GO_HIPPOCAMPUS_DEVELOPMENT                                               | Development | 0.000101487 | 0.001389958 | 0.55115506 | 1.72930131  | 107 | D4_G7 |
| GO_POSITIVE_REGULATION_OF_DENDRITIC_SPINE_DEVELOPMENT                    | Development | 0.00080928  | 0.006558538 | 0.58470847 | 1.727553278 | 53  | D4_G7 |
| GO_CEREBELLAR_PURKINJE_CELL_LAYER_DEVELOPMENT                            | Development | 0.001418749 | 0.010413085 | 0.58884017 | 1.72166616  | 48  | D4_G7 |
| GO_POSITIVE_REGULATION_OF_CELL_MORPHOGENESIS_INVOLVED_IN_DIFFERENTIATION | Development | 5.00E-05    | 0.000888889 | 0.53234572 | 1.71642115  | 238 | D4_G7 |
| GO_HINDBRAIN_DEVELOPMENT                                                 | Development | 5.01E-05    | 0.000888889 | 0.5294398  | 1.700857935 | 206 | D4_G7 |
| GO_NEURON_FATE_COMMITMENT                                                | Development | 0.000415714 | 0.004146481 | 0.55238422 | 1.692191996 | 77  | D4_G7 |
| GO_CEREBELLAR_CORTEX_DEVELOPMENT                                         | Development | 0.000519373 | 0.004927706 | 0.54885314 | 1.683254978 | 78  | D4_G7 |
| GO_POSITIVE_REGULATION_OF_DEVELOPMENTAL_GROWTH                           | Development | 5.01E-05    | 0.000888889 | 0.52339832 | 1.680766331 | 202 | D4_G7 |
| GO_HINDBRAIN_MORPHOGENESIS                                               | Development | 0.00140948  | 0.010413085 | 0.54012398 | 1.64531947  | 71  | D4_G7 |
| GO_NEGATIVE_REGULATION_OF_FAT_CELL_DIFFERENTIATION                       | Development | 0.005035693 | 0.03159491  | 0.56846859 | 1.641682037 | 43  | D4_G7 |
| GO_OLFACTORY_LOBE_DEVELOPMENT                                            | Development | 0.003129215 | 0.021077389 | 0.55564402 | 1.641680776 | 53  | D4_G7 |
| GO_FOREBRAIN_NEURON_DEVELOPMENT                                          | Development | 0.003142644 | 0.021077389 | 0.54585517 | 1.632714065 | 59  | D4_G7 |
| GO_DEVELOPMENTAL_CELL_GROWTH                                             | Development | 0.001017967 | 0.007919784 | 0.51382765 | 1.607156967 | 103 | D4_G7 |
| GO_EMBRYONIC_EYE_MORPHOGENESIS                                           | Development | 0.006789419 | 0.040016426 | 0.54547813 | 1.601924979 | 50  | D4_G7 |
| GO_INNER_EAR_MORPHOGENESIS                                               | Development | 0.000301462 | 0.003257465 | 0.49698228 | 1.581193622 | 149 | D4_G7 |

|                                                       |             |             |             |            |             |     |       |
|-------------------------------------------------------|-------------|-------------|-------------|------------|-------------|-----|-------|
| GO_EYE_MORPHOGENESIS                                  | Development | 0.000100155 | 0.001389958 | 0.48944086 | 1.570852086 | 197 | D4_G7 |
| GO_CELL_FATE_COMMITMENT                               | Development | 5.00E-05    | 0.000888889 | 0.48422914 | 1.559140564 | 229 | D4_G7 |
| GO_LIMBIC_SYSTEM_DEVELOPMENT                          | Development | 0.000553153 | 0.00512325  | 0.48923413 | 1.553958115 | 142 | D4_G7 |
| GO_POSITIVE_REGULATION_OF_MUSCLE_CELL_DIFFERENTIATION | Development | 0.005369196 | 0.033152656 | 0.49121245 | 1.527184689 | 93  | D4_G7 |
| GO_EAR_MORPHOGENESIS                                  | Development | 0.000652087 | 0.005582784 | 0.47646156 | 1.521615999 | 169 | D4_G7 |
| GO_NEURAL_CREST_CELL_DIFFERENTIATION                  | Development | 0.00660218  | 0.03951151  | 0.48935826 | 1.519887875 | 92  | D4_G7 |
| GO_EMBRYONIC_SKELETAL_SYSTEM_MORPHOGENESIS            | Development | 0.003590029 | 0.023669851 | 0.47662966 | 1.503226835 | 120 | D4_G7 |
| GO_AORTA_DEVELOPMENT                                  | Development | 0.008606557 | 0.047827869 | 0.48420084 | 1.502058524 | 91  | D4_G7 |
| GO_DIENCEPHALON_DEVELOPMENT                           | Development | 0.008116386 | 0.045757596 | 0.48134328 | 1.500453905 | 97  | D4_G7 |
| GO_CAMERA_TYPE_EYE_MORPHOGENESIS                      | Development | 0.002412666 | 0.016759416 | 0.47151067 | 1.498792377 | 145 | D4_G7 |
| GO_CARDIAC_SEPTUM_DEVELOPMENT                         | Development | 0.004895034 | 0.031215875 | 0.46840512 | 1.481096942 | 127 | D4_G7 |
| GO_GLIAL_CELL_DIFFERENTIATION                         | Development | 0.002056169 | 0.014542719 | 0.45952702 | 1.468336049 | 171 | D4_G7 |
| GO_ENDOCRINE_SYSTEM_DEVELOPMENT                       | Development | 0.007464945 | 0.042703877 | 0.45868663 | 1.451179752 | 129 | D4_G7 |
| GO_PALLIUM_DEVELOPMENT                                | Development | 0.001100275 | 0.008392294 | 0.44580659 | 1.437870192 | 241 | D4_G7 |
| GO_CARDIAC_CHAMBER_DEVELOPMENT                        | Development | 0.002051641 | 0.014542719 | 0.44568136 | 1.433291634 | 213 | D4_G7 |
| GO_EMBRYONIC_SKELETAL_SYSTEM_DEVELOPMENT              | Development | 0.007386192 | 0.042703877 | 0.44741699 | 1.424605888 | 154 | D4_G7 |
| GO_OOCYTE_DIFFERENTIATION                             | Development | 0.004660798 | 0.030217504 | -0.3968201 | -1.76247704 | 43  | D4_G7 |
| GO_BLASTOCYST_DEVELOPMENT                             | Development | 0.000829187 | 0.006582733 | -0.3671466 | -1.78767423 | 60  | D4_G7 |
| GO_REGULATION_OF_CELL_FATE_COMMITMENT                 | Development | 0.005843933 | 0.035520153 | -0.4516309 | -1.7942813  | 29  | D4_G7 |
| GO_CELL_DIFFERENTIATION_IN_SPINAL_CORD                | Development | 9.90E-05    | 0.002581767 | 0.62829844 | 2.740709345 | 69  | D4_G8 |
| GO_SPINAL_CORD_DEVELOPMENT                            | Development | 9.31E-05    | 0.002581767 | 0.52177639 | 2.58001771  | 138 | D4_G8 |
| GO_NEURON_FATE_SPECIFICATION                          | Development | 0.000106191 | 0.002581767 | 0.6720585  | 2.498855889 | 35  | D4_G8 |
| GO_VENTRAL_SPINAL_CORD_DEVELOPMENT                    | Development | 0.000100361 | 0.002581767 | 0.57503487 | 2.449087263 | 61  | D4_G8 |
| GO_NEURAL_RETINA_DEVELOPMENT                          | Development | 9.97E-05    | 0.002581767 | 0.56539956 | 2.444318503 | 66  | D4_G8 |
| GO_NEURON_FATE_COMMITMENT                             | Development | 9.85E-05    | 0.002581767 | 0.51805976 | 2.304589839 | 77  | D4_G8 |
| GO_CELL_FATE_COMMITMENT                               | Development | 8.80E-05    | 0.002581767 | 0.42622889 | 2.269534683 | 229 | D4_G8 |
| GO_RETINA_MORPHOGENESIS_IN_CAMERA_TYPE_EYE            | Development | 0.000100796 | 0.002581767 | 0.52703923 | 2.235912731 | 60  | D4_G8 |
| GO_SYMPATHETIC_NERVOUS_SYSTEM_DEVELOPMENT             | Development | 0.000211573 | 0.004137858 | 0.58942784 | 2.20761942  | 36  | D4_G8 |
| GO_SPINAL_CORD_PATTERNING                             | Development | 0.000432807 | 0.007320079 | 0.61612271 | 2.204317434 | 30  | D4_G8 |
| GO_ENDOCRINE_SYSTEM_DEVELOPMENT                       | Development | 9.38E-05    | 0.002581767 | 0.44918216 | 2.195882069 | 129 | D4_G8 |
| GO_ENDOCRINE_PANCREAS_DEVELOPMENT                     | Development | 0.000104712 | 0.002581767 | 0.56610243 | 2.190639046 | 41  | D4_G8 |
| GO_CELL_FATE_SPECIFICATION                            | Development | 9.84E-05    | 0.002581767 | 0.48621848 | 2.183685393 | 81  | D4_G8 |
| GO_AUTONOMIC_NERVOUS_SYSTEM_DEVELOPMENT               | Development | 0.000101194 | 0.002581767 | 0.51783276 | 2.178077455 | 58  | D4_G8 |
| GO_CELL_DIFFERENTIATION_IN_HINDBRAIN                  | Development | 0.000212743 | 0.004137858 | 0.57994956 | 2.143874495 | 34  | D4_G8 |
| GO_PANCREAS_DEVELOPMENT                               | Development | 9.82E-05    | 0.002581767 | 0.47292477 | 2.129169052 | 82  | D4_G8 |
| GO_CARDIAC_ATRIUM_DEVELOPMENT                         | Development | 0.000209842 | 0.004137858 | 0.5495511  | 2.111244496 | 40  | D4_G8 |
| GO_CEREBELLAR_PURKINJE_CELL_LAYER_MORPHOGENESIS       | Development | 0.000652671 | 0.010578701 | 0.59635349 | 2.066028305 | 26  | D4_G8 |
| GO_SPINAL_CORD_MOTOR_NEURON_DIFFERENTIATION           | Development | 0.001341174 | 0.017390557 | 0.49002242 | 1.942400616 | 45  | D4_G8 |
| GO_CRANIAL_NERVE_MORPHOGENESIS                        | Development | 0.001121419 | 0.016156742 | 0.48068262 | 1.942179644 | 48  | D4_G8 |
| GO_PERICARDIUM_DEVELOPMENT                            | Development | 0.003045796 | 0.03037986  | 0.55170171 | 1.911335091 | 26  | D4_G8 |
| GO_CENTRAL_NERVOUS_SYSTEM_NEURON_DEVELOPMENT          | Development | 0.00018797  | 0.004137858 | 0.39129093 | 1.901854279 | 124 | D4_G8 |
| GO_RETINA_DEVELOPMENT_IN_CAMERA_TYPE_EYE              | Development | 8.95E-05    | 0.002581767 | 0.36793714 | 1.898602791 | 181 | D4_G8 |
| GO_NEGATIVE_REGULATION_OF_FAT_CELL_DIFFERENTIATION    | Development | 0.002292622 | 0.025480855 | 0.47975781 | 1.880693033 | 43  | D4_G8 |
| GO_CAMERA_TYPE_EYE_MORPHOGENESIS                      | Development | 9.22E-05    | 0.002581767 | 0.37358712 | 1.863334723 | 145 | D4_G8 |
| GO_DORSAL_VENTRAL_PATTERN_FORMATION                   | Development | 0.000283634 | 0.00501517  | 0.38551145 | 1.85430041  | 116 | D4_G8 |
| GO_GLANDULAR_EPITHELIAL_CELL_DIFFERENTIATION          | Development | 0.002675172 | 0.028906723 | 0.46011169 | 1.832662991 | 46  | D4_G8 |
| GO_CRANIAL_NERVE_DEVELOPMENT                          | Development | 0.001278647 | 0.017151501 | 0.4070015  | 1.814820212 | 78  | D4_G8 |
| GO_CEREBELLAR_CORTEX_MORPHOGENESIS                    | Development | 0.003485392 | 0.033589723 | 0.44178101 | 1.795063415 | 50  | D4_G8 |
| GO_HINDBRAIN_DEVELOPMENT                              | Development | 8.86E-05    | 0.002581767 | 0.34159566 | 1.794191318 | 206 | D4_G8 |
| GO_EYE_MORPHOGENESIS                                  | Development | 0.000266052 | 0.004928293 | 0.33957945 | 1.772347649 | 197 | D4_G8 |
| GO_NEGATIVE_REGULATION_OF_DEVELOPMENTAL_GROWTH        | Development | 0.00104742  | 0.016156742 | 0.37073017 | 1.758136206 | 107 | D4_G8 |
| GO_PITUITARY_GLAND_DEVELOPMENT                        | Development | 0.00471553  | 0.04209155  | 0.4287882  | 1.742270448 | 50  | D4_G8 |

|                                                                |             |             |             |            |             |     |       |
|----------------------------------------------------------------|-------------|-------------|-------------|------------|-------------|-----|-------|
| GO_EMBRYONIC_SKELETAL_SYSTEM_DEVELOPMENT                       | Development | 0.001193098 | 0.016575545 | 0.33083594 | 1.66400465  | 154 | D4_G8 |
| GO_METENCEPHALON_DEVELOPMENT                                   | Development | 0.001554499 | 0.018896877 | 0.32644602 | 1.6466139   | 156 | D4_G8 |
| GO_GLIAL_CELL_DIFFERENTIATION                                  | Development | 0.001535543 | 0.018896877 | 0.32103385 | 1.643663166 | 171 | D4_G8 |
| GO_HIPPOCAMPUS_DEVELOPMENT                                     | Development | 0.004760998 | 0.04209155  | 0.34270293 | 1.625220953 | 107 | D4_G8 |
| GO_INNER_EAR_MORPHOGENESIS                                     | Development | 0.002848479 | 0.02938244  | 0.32302246 | 1.618434357 | 149 | D4_G8 |
| GO_ANTERIOR_POSTERIOR_PATTERN_SPECIFICATION                    | Development | 0.002204974 | 0.025227501 | 0.29825496 | 1.58674261  | 228 | D4_G8 |
| GO_EAR_MORPHOGENESIS                                           | Development | 0.003540305 | 0.033589723 | 0.31068949 | 1.586217157 | 169 | D4_G8 |
| GO_REGULATION_OF_CARDIAC_MUSCLE_TISSUE_DEVELOPMENT             | Development | 0.003912363 | 0.036235934 | -0.4024035 | -1.7318723  | 54  | D4_G8 |
| GO_REGULATION_OF_HEMATOPOIETIC_PROGENITOR_CELL_DIFFERENTIATION | Development | 0.002870264 | 0.02938244  | -0.4443827 | -1.77733099 | 41  | D4_G8 |
| GO_BLASTOCYST_DEVELOPMENT                                      | Development | 0.001091162 | 0.016156742 | -0.4134066 | -1.8160882  | 60  | D4_G8 |
| GO_POSITIVE_REGULATION_OF_CARDIAC_MUSCLE_TISSUE_DEVELOPMENT    | Development | 0.002180301 | 0.025227501 | -0.4715215 | -1.82620015 | 36  | D4_G8 |
| GO_TRNA_METABOLIC_PROCESS                                      | Metabolism  | 5.29E-05    | 0.002877512 | 0.47135574 | 2.051504642 | 171 | D4_G1 |
| GO_SNRNA_METABOLIC_PROCESS                                     | Metabolism  | 5.73E-05    | 0.002877512 | 0.49590378 | 1.969693227 | 81  | D4_G1 |
| KEGG_ALANINE_ASPARTATE_AND_Glutamate_Metabolism                | Metabolism  | 0.000457816 | 0.006175115 | 0.59499949 | 1.926579623 | 27  | D4_G1 |
| GO_CELLULAR_METABOLIC_COMPOUND_SALVAGE                         | Metabolism  | 0.000516996 | 0.006400785 | 0.56620153 | 1.874845799 | 30  | D4_G1 |
| REACTOME_METABOLISM_OF_VITAMINS_AND_COFACTORS                  | Metabolism  | 0.000304488 | 0.005845402 | 0.49940474 | 1.831197943 | 50  | D4_G1 |
| GO_WATER_SOLUBLE_VITAMIN_METABOLIC_PROCESS                     | Metabolism  | 0.000229056 | 0.005845402 | 0.46099182 | 1.831025497 | 81  | D4_G1 |
| GO_PHOSPHATIDYLCHOLINE_METABOLIC_PROCESS                       | Metabolism  | 0.000428895 | 0.006175115 | 0.50029574 | 1.81404389  | 47  | D4_G1 |
| GO_SERINE_FAMILY_AMINO_ACID_METABOLIC_PROCESS                  | Metabolism  | 0.001141046 | 0.010425011 | 0.52497627 | 1.797599793 | 35  | D4_G1 |
| GO_ALPHA_AMINO_ACID_METABOLIC_PROCESS                          | Metabolism  | 5.26E-05    | 0.002877512 | 0.40799823 | 1.78793792  | 184 | D4_G1 |
| GO_DICARBOXYLIC_ACID_METABOLIC_PROCESS                         | Metabolism  | 0.000283543 | 0.005845402 | 0.44465377 | 1.783961661 | 86  | D4_G1 |
| KEGG_GLYCEROPHOSPHOLIPID_METABOLISM                            | Metabolism  | 0.000651813 | 0.007278581 | 0.4634042  | 1.760920166 | 61  | D4_G1 |
| REACTOME_METABOLISM_OF_NON_CODING_RNA                          | Metabolism  | 0.000786973 | 0.007909074 | 0.4756015  | 1.756172336 | 52  | D4_G1 |
| GO_STEROL_METABOLIC_PROCESS                                    | Metabolism  | 0.000277762 | 0.005845402 | 0.42256368 | 1.741046826 | 105 | D4_G1 |
| REACTOME_PURINE_METABOLISM                                     | Metabolism  | 0.003694581 | 0.026885982 | 0.52851556 | 1.73793862  | 29  | D4_G1 |
| GO_CELLULAR_MODIFIED_AMINO_ACID_METABOLIC_PROCESS              | Metabolism  | 5.29E-05    | 0.002877512 | 0.39763338 | 1.730195999 | 170 | D4_G1 |
| KEGG_CYSTEINE_AND_METHIONINE_METABOLISM                        | Metabolism  | 0.004045723 | 0.026885982 | 0.51822462 | 1.728070387 | 31  | D4_G1 |
| GO_MITOCHONDRIAL_RNA_METABOLIC_PROCESS                         | Metabolism  | 0.004047023 | 0.026885982 | 0.5149483  | 1.727535114 | 32  | D4_G1 |
| GO_VITAMIN_METABOLIC_PROCESS                                   | Metabolism  | 0.00027603  | 0.005845402 | 0.41135922 | 1.707372868 | 111 | D4_G1 |
| GO_HEME_METABOLIC_PROCESS                                      | Metabolism  | 0.006814423 | 0.037018891 | 0.53383932 | 1.697209884 | 25  | D4_G1 |
| KEGG_AMINO_SUGAR_AND_NUCLEOTIDE_SUGAR_METABOLISM               | Metabolism  | 0.003012974 | 0.024224313 | 0.46946348 | 1.695835366 | 46  | D4_G1 |
| GO_ASPARTATE_FAMILY_AMINO_ACID_METABOLIC_PROCESS               | Metabolism  | 0.002404858 | 0.020140684 | 0.45083193 | 1.682692611 | 55  | D4_G1 |
| KEGG_GLYCEROLIPID_METABOLISM                                   | Metabolism  | 0.005127255 | 0.030772433 | 0.46815878 | 1.671911733 | 43  | D4_G1 |
| GO_PIGMENT_METABOLIC_PROCESS                                   | Metabolism  | 0.004146594 | 0.026885982 | 0.45605957 | 1.667787493 | 49  | D4_G1 |
| GO_Glutamine_FAMILY_AMINO_ACID_METABOLIC_PROCESS               | Metabolism  | 0.003897448 | 0.026885982 | 0.45429444 | 1.665789254 | 50  | D4_G1 |
| KEGG_PURINE_METABOLISM                                         | Metabolism  | 0.00054136  | 0.006400785 | 0.38660064 | 1.640357672 | 134 | D4_G1 |
| GO_ETHANOLAMINE_CONTAINING_COMPOUND_METABOLIC_PROCESS          | Metabolism  | 0.005451529 | 0.031307351 | 0.42929378 | 1.631301736 | 61  | D4_G1 |
| GO_TETRAPYRROLE_METABOLIC_PROCESS                              | Metabolism  | 0.00817123  | 0.041060431 | 0.44105268 | 1.612908037 | 49  | D4_G1 |
| GO_NUCLEOSIDE_TRIPHOSPHATE_METABOLIC_PROCESS                   | Metabolism  | 0.000154871 | 0.005845402 | 0.36010474 | 1.611942019 | 237 | D4_G1 |
| REACTOME_METABOLISM_OF_NUCLEOTIDES                             | Metabolism  | 0.005205287 | 0.030772433 | 0.41197983 | 1.59610267  | 69  | D4_G1 |
| REACTOME_METABOLISM_OF_AMINO_ACIDS_AND_DERIVATIVES             | Metabolism  | 0.000905797 | 0.008669772 | 0.36757119 | 1.587688492 | 158 | D4_G1 |
| GO_REGULATION_OF_CELLULAR_AMINO_ACID_METABOLIC_PROCESS         | Metabolism  | 0.009483977 | 0.046494621 | 0.4099552  | 1.570482021 | 64  | D4_G1 |
| KEGG_PYRIMIDINE_METABOLISM                                     | Metabolism  | 0.008092615 | 0.041060431 | 0.37827158 | 1.533325524 | 92  | D4_G1 |
| GO_MULTI_ORGANISM_METABOLIC_PROCESS                            | Metabolism  | 0.005637037 | 0.031473459 | 0.32719118 | 1.44644017  | 203 | D4_G1 |
| GO_MONOSACCHARIDE_METABOLIC_PROCESS                            | Metabolism  | 0.01037552  | 0.049654275 | 0.3254096  | 1.423974608 | 182 | D4_G1 |
| GO_MUCOPOLYSACCHARIDE_METABOLIC_PROCESS                        | Metabolism  | 0.007312614 | 0.038679881 | -0.2766679 | -1.45510219 | 93  | D4_G1 |
| GO_AMINOGLYCAN_METABOLIC_PROCESS                               | Metabolism  | 0.001355932 | 0.011849668 | -0.2746125 | -1.54258535 | 137 | D4_G1 |
| REACTOME_HEPARAN_SULFATE_HEPARIN_HS_GAG_METABOLISM             | Metabolism  | 0.004669047 | 0.029327451 | -0.3653992 | -1.66994458 | 48  | D4_G1 |
| REACTOME_CHONDROITIN_SULFATE_DERMATAN_SULFATE_METABOLISM       | Metabolism  | 0.004078511 | 0.026885982 | -0.3920916 | -1.72537323 | 41  | D4_G1 |
| GO_MULTICELLULAR_ORGANISM_METABOLIC_PROCESS                    | Metabolism  | 0.000364166 | 0.006099782 | -0.3704505 | -1.85002762 | 72  | D4_G1 |
| GO_CHONDROITIN_SULFATE_PROTEOGLYCAN_METABOLIC_PROCESS          | Metabolism  | 0.000730638 | 0.007729382 | -0.4709846 | -2.01841738 | 37  | D4_G1 |
| GO_MULTICELLULAR_ORGANISMAL_MACROMOLECULE_METABOLIC_PROCESS    | Metabolism  | 0.000319898 | 0.005845402 | -0.437477  | -2.11651489 | 61  | D4_G1 |

|                                                                |            |             |             |            |             |     |       |
|----------------------------------------------------------------|------------|-------------|-------------|------------|-------------|-----|-------|
| GO_PROTEOGLYCAN_METABOLIC_PROCESS                              | Metabolism | 0.000460829 | 0.006175115 | -0.4659407 | -2.45282743 | 94  | D4_G1 |
| GO_MULTICELLULAR_ORGANISM_METABOLIC_PROCESS                    | Metabolism | 0.000116104 | 0.01174477  | 0.55770489 | 2.334701032 | 72  | D4_G2 |
| GO_MULTICELLULAR_ORGANISMAL_MACROMOLECULE_METABOLIC_PROCESS    | Metabolism | 0.000116863 | 0.01174477  | 0.55883257 | 2.258679692 | 61  | D4_G2 |
| GO_PROTEOGLYCAN_METABOLIC_PROCESS                              | Metabolism | 0.000102669 | 0.005159138 | 0.46128086 | 1.972295481 | 94  | D4_G3 |
| GO_MULTICELLULAR_ORGANISMAL_MACROMOLECULE_METABOLIC_PROCESS    | Metabolism | 0.002242838 | 0.030688147 | 0.4278828  | 1.693222839 | 61  | D4_G3 |
| GO_HEXOSE_METABOLIC_PROCESS                                    | Metabolism | 0.002749681 | 0.031504362 | -0.3204493 | -1.48592379 | 162 | D4_G3 |
| REACTOME_INTEGRATION_OF_ENERGY_METABOLISM                      | Metabolism | 0.002821286 | 0.031504362 | -0.3393676 | -1.52941016 | 132 | D4_G3 |
| GO_MONOSACCHARIDE_METABOLIC_PROCESS                            | Metabolism | 0.0004879   | 0.014009702 | -0.33388   | -1.57360867 | 182 | D4_G3 |
| GO_ALPHA_AMINO_ACID_METABOLIC_PROCESS                          | Metabolism | 9.75E-05    | 0.005159138 | -0.3465376 | -1.63646007 | 184 | D4_G3 |
| GO_NUCLEOSIDE_TRIPHOSPHATE_METABOLIC_PROCESS                   | Metabolism | 0.000196078 | 0.006568627 | -0.3367453 | -1.63996933 | 237 | D4_G3 |
| GO_VITAMIN_METABOLIC_PROCESS                                   | Metabolism | 0.000979624 | 0.017900399 | -0.3746713 | -1.64425139 | 111 | D4_G3 |
| REACTOME_METABOLISM_OF_AMINO_ACIDS_AND_DERIVATIVES             | Metabolism | 0.000195465 | 0.006568627 | -0.3579626 | -1.65507134 | 158 | D4_G3 |
| GO_UNSATURATED_FATTY_ACID_METABOLIC_PROCESS                    | Metabolism | 0.002442838 | 0.030688147 | -0.4028358 | -1.67204233 | 79  | D4_G3 |
| GO_CELLULAR_MODIFIED_AMINO_ACID_METABOLIC_PROCESS              | Metabolism | 9.81E-05    | 0.005159138 | -0.3581036 | -1.67258911 | 170 | D4_G3 |
| GO_DICARBOXYLIC_ACID_METABOLIC_PROCESS                         | Metabolism | 0.00117096  | 0.019613583 | -0.4032472 | -1.70124078 | 86  | D4_G3 |
| GO GLUTAMINE FAMILY AMINO ACID METABOLIC PROCESS               | Metabolism | 0.002441406 | 0.030688147 | -0.453719  | -1.72386943 | 50  | D4_G3 |
| GO_TETRAPYRROLE_METABOLIC_PROCESS                              | Metabolism | 0.001948748 | 0.030130641 | -0.4680752 | -1.77250467 | 49  | D4_G3 |
| GO_WATER_SOLUBLE_VITAMIN_METABOLIC_PROCESS                     | Metabolism | 9.78E-05    | 0.005159138 | -0.450648  | -1.87815003 | 81  | D4_G3 |
| KEGG_ARACHIDONIC_ACID_METABOLISM                               | Metabolism | 0.000966277 | 0.017900399 | -0.5341316 | -1.89268483 | 36  | D4_G3 |
| GO GLUTATHIONE METABOLIC PROCESS                               | Metabolism | 0.000682195 | 0.017140142 | -0.5071172 | -1.91212171 | 48  | D4_G3 |
| KEGG ALANINE ASPARTATE AND GLUTAMATE METABOLISM                | Metabolism | 0.000967961 | 0.017900399 | -0.5918126 | -1.94766893 | 27  | D4_G3 |
| GO_CATECHOLAMINE_METABOLIC_PROCESS                             | Metabolism | 0.008934046 | 0.033254504 | 0.48496289 | 1.717843738 | 37  | D4_G4 |
| GO_CATECHOL_CONTAINING_COMPOUND_METABOLIC_PROCESS              | Metabolism | 0.008934046 | 0.033254504 | 0.48496289 | 1.717843738 | 37  | D4_G4 |
| GO_CELLULAR_CARBOHYDRATE_METABOLIC_PROCESS                     | Metabolism | 0.015171078 | 0.049183656 | -0.271895  | -1.39308469 | 141 | D4_G4 |
| GO_PHOSPHATIDYLINOSITOL_METABOLIC_PROCESS                      | Metabolism | 0.009333107 | 0.034108264 | -0.2678561 | -1.40514749 | 163 | D4_G4 |
| GO_AMMONIUM_ION_METABOLIC_PROCESS                              | Metabolism | 0.015464731 | 0.049339856 | -0.2768664 | -1.40970046 | 135 | D4_G4 |
| REACTOME_PHOSPHOLIPID_METABOLISM                               | Metabolism | 0.006359574 | 0.027197326 | -0.2734068 | -1.4421888  | 168 | D4_G4 |
| GO_MULTI_ORGANISM_METABOLIC_PROCESS                            | Metabolism | 0.002790698 | 0.013792028 | -0.2750495 | -1.49384115 | 203 | D4_G4 |
| REACTOME_FATTY_ACID_TRIACYLGLYCEROL_AND_KETONE_BODY_METABOLISM | Metabolism | 0.00297047  | 0.014215821 | -0.2813902 | -1.49516575 | 176 | D4_G4 |
| GO_MONOSACCHARIDE_METABOLIC_PROCESS                            | Metabolism | 0.002637595 | 0.013792028 | -0.2797794 | -1.49670388 | 182 | D4_G4 |
| GO_SNRNA_METABOLIC_PROCESS                                     | Metabolism | 0.01326405  | 0.043706133 | -0.325363  | -1.50715623 | 81  | D4_G4 |
| GO_PYRIMIDINE_NUCLEOSIDE_METABOLIC_PROCESS                     | Metabolism | 0.012933568 | 0.043706133 | -0.4190993 | -1.63171968 | 38  | D4_G4 |
| GO_NUCLEOSIDE_TRIPHOSPHATE_METABOLIC_PROCESS                   | Metabolism | 0.000201248 | 0.002379459 | -0.2954913 | -1.63663854 | 237 | D4_G4 |
| GO_UNSATURATED_FATTY_ACID_METABOLIC_PROCESS                    | Metabolism | 0.002703068 | 0.013792028 | -0.3569614 | -1.64538484 | 79  | D4_G4 |
| GO_TETRAPYRROLE_METABOLIC_PROCESS                              | Metabolism | 0.00783162  | 0.031282777 | -0.3979684 | -1.64708174 | 49  | D4_G4 |
| REACTOME_METABOLISM_OF_NON_CODING_RNA                          | Metabolism | 0.007215725 | 0.0295992   | -0.3937754 | -1.65114336 | 52  | D4_G4 |
| GO_NUCLEOTIDE_SUGAR_METABOLIC_PROCESS                          | Metabolism | 0.010526316 | 0.037781955 | -0.4391052 | -1.65197849 | 33  | D4_G4 |
| KEGG_TYROSINE_METABOLISM                                       | Metabolism | 0.012330456 | 0.043481082 | -0.4559376 | -1.65546698 | 29  | D4_G4 |
| GO_FOLIC_ACID_CONTAINING_COMPOUND_METABOLIC_PROCESS            | Metabolism | 0.013094718 | 0.043706133 | -0.4764764 | -1.66084021 | 25  | D4_G4 |
| GO_PYRIMIDINE_NUCLEOTIDE_METABOLIC_PROCESS                     | Metabolism | 0.006984586 | 0.029247953 | -0.4131515 | -1.66609295 | 44  | D4_G4 |
| GO_HEME_METABOLIC_PROCESS                                      | Metabolism | 0.012658228 | 0.043706133 | -0.4783672 | -1.66743097 | 25  | D4_G4 |
| KEGG_PROANOATE_METABOLISM                                      | Metabolism | 0.007937421 | 0.031282777 | -0.4436118 | -1.67899974 | 34  | D4_G4 |
| GO_ICOSANOID_METABOLIC_PROCESS                                 | Metabolism | 0.002215561 | 0.013097876 | -0.3846264 | -1.69790138 | 65  | D4_G4 |
| GO_FATTY_ACID_DERIVATIVE_METABOLIC_PROCESS                     | Metabolism | 0.002215561 | 0.013097876 | -0.3846264 | -1.69790138 | 65  | D4_G4 |
| GO_ETHANOLAMINE_CONTAINING_COMPOUND_METABOLIC_PROCESS          | Metabolism | 0.002813299 | 0.013792028 | -0.3898746 | -1.69807699 | 61  | D4_G4 |
| GO_AMINE_METABOLIC_PROCESS                                     | Metabolism | 0.001247056 | 0.008711707 | -0.3639361 | -1.70543252 | 86  | D4_G4 |
| KEGG_FATTY_ACID_METABOLISM                                     | Metabolism | 0.005548996 | 0.024246702 | -0.4374208 | -1.7138028  | 39  | D4_G4 |
| GO_ALDITOL_PHOSPHATE_METABOLIC_PROCESS                         | Metabolism | 0.008310249 | 0.03212231  | -0.4828167 | -1.71670294 | 27  | D4_G4 |
| GO_PYRIMIDINE_CONTAINING_COMPOUND_METABOLIC_PROCESS            | Metabolism | 0.002364998 | 0.013204572 | -0.387123  | -1.71884177 | 67  | D4_G4 |
| KEGG_PYRIMIDINE_METABOLISM                                     | Metabolism | 0.000839043 | 0.00674591  | -0.3674922 | -1.74779858 | 92  | D4_G4 |
| GO_NUCLEOBASE_METABOLIC_PROCESS                                | Metabolism | 0.002351558 | 0.013204572 | -0.4584774 | -1.78503416 | 38  | D4_G4 |
| GO_ONE_CARBON_METABOLIC_PROCESS                                | Metabolism | 0.003474947 | 0.015521429 | -0.493943  | -1.79346115 | 29  | D4_G4 |

|                                                     |            |             |             |            |             |     |       |
|-----------------------------------------------------|------------|-------------|-------------|------------|-------------|-----|-------|
| GO_HISTONE_MRNA_METABOLIC_PROCESS                   | Metabolism | 0.003382187 | 0.015450446 | -0.4915575 | -1.79894345 | 30  | D4_G4 |
| KEGG_METABOLISM_OF_XENOBIOTICS_BY_CYTOCHROME_P450   | Metabolism | 0.003382187 | 0.015450446 | -0.4928882 | -1.80381324 | 30  | D4_G4 |
| GO ASPARTATE_FAMILY_AMINO_ACID_METABOLIC_PROCESS    | Metabolism | 0.001256913 | 0.008711707 | -0.4287566 | -1.82265622 | 55  | D4_G4 |
| GO_PTERIDINE_CONTAINING_COMPOUND_METABOLIC_PROCESS  | Metabolism | 0.002155661 | 0.013097876 | -0.4887519 | -1.82530109 | 32  | D4_G4 |
| GO_BRANCHED_CHAIN_AMINO_ACID_METABOLIC_PROCESS      | Metabolism | 0.002437673 | 0.013242495 | -0.5184015 | -1.84322795 | 27  | D4_G4 |
| GO_AMINO_SUGAR_METABOLIC_PROCESS                    | Metabolism | 0.001474926 | 0.009563232 | -0.4941229 | -1.84535971 | 32  | D4_G4 |
| KEGG_CYSTEINE_AND_METHIONINE_METABOLISM             | Metabolism | 0.00147242  | 0.009563232 | -0.5035066 | -1.8599316  | 31  | D4_G4 |
| GO_PIGMENT_METABOLIC_PROCESS                        | Metabolism | 0.001101322 | 0.008198727 | -0.4504358 | -1.86423004 | 49  | D4_G4 |
| GO_SERINE_FAMILY_AMINO_ACID_METABOLIC_PROCESS       | Metabolism | 0.000580653 | 0.005074399 | -0.4940931 | -1.88053075 | 35  | D4_G4 |
| GO_PHOSPHATIDYLCHOLINE_METABOLIC_PROCESS            | Metabolism | 0.001089852 | 0.008198727 | -0.4586218 | -1.88122392 | 47  | D4_G4 |
| KEGG_ARACHIDONIC_ACID_METABOLISM                    | Metabolism | 0.000463822 | 0.004439438 | -0.4979995 | -1.9134     | 36  | D4_G4 |
| GO_GLUTATHIONE_METABOLIC_PROCESS                    | Metabolism | 0.000607977 | 0.005091804 | -0.4681956 | -1.93040356 | 48  | D4_G4 |
| REACTOME_METABOLISM_OF_NUCLEOTIDES                  | Metabolism | 0.000263296 | 0.0027854   | -0.4337532 | -1.94120306 | 69  | D4_G4 |
| GO_MITOCHONDRIAL_RNA_METABOLIC_PROCESS              | Metabolism | 0.000567279 | 0.005074399 | -0.5342895 | -1.99536669 | 32  | D4_G4 |
| KEGG_ARGININE_AND_PROLINE_METABOLISM                | Metabolism | 0.000241779 | 0.002699871 | -0.4913264 | -2.00439951 | 46  | D4_G4 |
| GO_DICARBOXYLIC_ACID_METABOLIC_PROCESS              | Metabolism | 0.000138562 | 0.002228184 | -0.4293723 | -2.01207146 | 86  | D4_G4 |
| KEGG_DRUG_METABOLISM_CYTOCHROME_P450                | Metabolism | 0.000453052 | 0.004439438 | -0.5478364 | -2.02368384 | 31  | D4_G4 |
| REACTOME_METABOLISM_OF_AMINO_ACIDS_AND_DERIVATIVES  | Metabolism | 0.000167926 | 0.002228184 | -0.3886061 | -2.03066644 | 158 | D4_G4 |
| GO_CELLULAR_MODIFIED_AMINO_ACID_METABOLIC_PROCESS   | Metabolism | 0.000171851 | 0.002228184 | -0.3861545 | -2.04149873 | 170 | D4_G4 |
| KEGG_PURINE_METABOLISM                              | Metabolism | 0.000158003 | 0.002228184 | -0.4053307 | -2.06031996 | 134 | D4_G4 |
| KEGG_GLYCEROPHOSPHOLIPID_METABOLISM                 | Metabolism | 0.000127877 | 0.002228184 | -0.4736846 | -2.06310706 | 61  | D4_G4 |
| KEGG_AMINO_SUGAR_AND_NUCLEOTIDE_SUGAR_METABOLISM    | Metabolism | 0.00012089  | 0.002228184 | -0.5075563 | -2.07061042 | 46  | D4_G4 |
| GO_ALPHA_AMINO_ACID_METABOLIC_PROCESS               | Metabolism | 0.000177368 | 0.002228184 | -0.3924113 | -2.10033503 | 184 | D4_G4 |
| GO_GLUTAMINE_FAMILY_AMINO_ACID_METABOLIC_PROCESS    | Metabolism | 0.000122926 | 0.002228184 | -0.5066564 | -2.1042437  | 50  | D4_G4 |
| KEGG_GLUTATHIONE_METABOLISM                         | Metabolism | 0.000120424 | 0.002228184 | -0.5227413 | -2.10802972 | 44  | D4_G4 |
| GO_WATER_SOLUBLE_VITAMIN_METABOLIC_PROCESS          | Metabolism | 0.000136743 | 0.002228184 | -0.4582431 | -2.12268768 | 81  | D4_G4 |
| GO_CELLULAR_METABOLIC_COMPOUND_SALVAGE              | Metabolism | 0.00011274  | 0.002228184 | -0.5823879 | -2.13135342 | 30  | D4_G4 |
| REACTOME_METABOLISM_OF_VITAMINS_AND_COFACTORS       | Metabolism | 0.000122926 | 0.002228184 | -0.5212041 | -2.16466341 | 50  | D4_G4 |
| GO_TRNA_METABOLIC_PROCESS                           | Metabolism | 0.000172028 | 0.002228184 | -0.4180037 | -2.21168014 | 171 | D4_G4 |
| GO_VITAMIN_METABOLIC_PROCESS                        | Metabolism | 0.000148302 | 0.002228184 | -0.4522509 | -2.22795277 | 111 | D4_G4 |
| REACTOME_PURINE_METABOLISM                          | Metabolism | 0.000112095 | 0.002228184 | -0.6279314 | -2.27996058 | 29  | D4_G4 |
| KEGG_ALANINE ASPARTATE_AND GLUTAMATE_METABOLISM     | Metabolism | 0.000110803 | 0.002228184 | -0.6838897 | -2.43163764 | 27  | D4_G4 |
| KEGG_DRUG_METABOLISM_CYTOCHROME_P450                | Metabolism | 0.000236481 | 0.009506543 | 0.64858916 | 2.083644157 | 31  | D4_G5 |
| KEGG_GLUTATHIONE_METABOLISM                         | Metabolism | 7.50E-05    | 0.009506543 | 0.60081938 | 2.076509948 | 44  | D4_G5 |
| KEGG_METABOLISM_OF_XENOBIOTICS_BY_CYTOCHROME_P450   | Metabolism | 0.000396008 | 0.011371094 | 0.63404305 | 2.0178902   | 30  | D4_G5 |
| GO_GLUTATHIONE_METABOLIC_PROCESS                    | Metabolism | 0.000222239 | 0.009506543 | 0.56420011 | 1.981792253 | 48  | D4_G5 |
| GO_WATER_SOLUBLE_VITAMIN_METABOLIC_PROCESS          | Metabolism | 0.000136584 | 0.009506543 | 0.50130305 | 1.926325396 | 81  | D4_G5 |
| GO_ALDITOL_PHOSPHATE_METABOLIC_PROCESS              | Metabolism | 0.002156377 | 0.03334091  | 0.60151229 | 1.871154763 | 27  | D4_G5 |
| GO_ICOSANOID_METABOLIC_PROCESS                      | Metabolism | 0.000634965 | 0.013013078 | 0.50158282 | 1.860248373 | 65  | D4_G5 |
| GO_FATTY_ACID_DERIVATIVE_METABOLIC_PROCESS          | Metabolism | 0.000634965 | 0.013013078 | 0.50158282 | 1.860248373 | 65  | D4_G5 |
| KEGG_ARACHIDONIC_ACID_METABOLISM                    | Metabolism | 0.002777349 | 0.039874799 | 0.55138236 | 1.832352794 | 36  | D4_G5 |
| GO_VITAMIN_METABOLIC_PROCESS                        | Metabolism | 0.000647417 | 0.013013078 | 0.43616136 | 1.759024228 | 111 | D4_G5 |
| GO_CELLULAR_MODIFIED_AMINO_ACID_METABOLIC_PROCESS   | Metabolism | 0.00030106  | 0.010085501 | 0.39798476 | 1.697841161 | 170 | D4_G5 |
| REACTOME_METABOLISM_OF_AMINO_ACIDS_AND_DERIVATIVES  | Metabolism | 0.003780488 | 0.045833759 | 0.36620015 | 1.547970022 | 158 | D4_G5 |
| GO_MULTI_ORGANISM_METABOLIC_PROCESS                 | Metabolism | 0.003524436 | 0.045833759 | 0.34910895 | 1.517230315 | 203 | D4_G5 |
| REACTOME_GLUCAGON_SIGNALING_IN_METABOLIC_REGULATION | Metabolism | 0.003876487 | 0.045833759 | -0.5074645 | -1.77346403 | 27  | D4_G5 |
| REACTOME_HEPARAN_SULFATE_HEPARIN_HS_GAG_METABOLISM  | Metabolism | 0.001076426 | 0.019669244 | -0.4474341 | -1.82088863 | 48  | D4_G5 |
| GO_HEPARAN_SULFATE_PROTEOGLYCAN_METABOLIC_PROCESS   | Metabolism | 0.001626898 | 0.027250542 | -0.507515  | -1.83157984 | 30  | D4_G5 |
| GO_PROTEOGLYCAN_METABOLIC_PROCESS                   | Metabolism | 0.00200562  | 0.009506543 | -0.4160563 | -1.95223439 | 94  | D4_G5 |
| KEGG_CYSTEINE_AND_METHIONINE_METABOLISM             | Metabolism | 0.000244529 | 0.004468206 | 0.62112122 | 1.919479057 | 31  | D4_G6 |
| GO_TRNA_METABOLIC_PROCESS                           | Metabolism | 5.10E-05    | 0.002182173 | 0.49366124 | 1.895578931 | 171 | D4_G6 |
| GO_SERINE_FAMILY_AMINO_ACID_METABOLIC_PROCESS       | Metabolism | 0.00018005  | 0.004468206 | 0.59682131 | 1.891222879 | 35  | D4_G6 |

|                                                               |            |             |             |            |             |     |       |
|---------------------------------------------------------------|------------|-------------|-------------|------------|-------------|-----|-------|
| GO DICARBOXYLIC ACID METABOLIC PROCESS                        | Metabolism | 5.39E-05    | 0.002182173 | 0.51652082 | 1.868167757 | 86  | D4_G6 |
| KEGG GLUTATHIONE METABOLISM                                   | Metabolism | 0.000174683 | 0.004468206 | 0.56082554 | 1.849580007 | 44  | D4_G6 |
| GO WATER SOLUBLE VITAMIN METABOLIC PROCESS                    | Metabolism | 5.43E-05    | 0.002182173 | 0.51099617 | 1.833556294 | 81  | D4_G6 |
| GO PHOSPHATIDYLGLYCEROL METABOLIC PROCESS                     | Metabolism | 0.000878679 | 0.009811921 | 0.60510017 | 1.806579852 | 26  | D4_G6 |
| GO PTERIDINE CONTAINING COMPOUND METABOLIC PROCESS            | Metabolism | 0.001034315 | 0.010941963 | 0.57855149 | 1.799069889 | 32  | D4_G6 |
| GO ASPARTATE FAMILY AMINO ACID METABOLIC PROCESS              | Metabolism | 0.000226244 | 0.004468206 | 0.51889738 | 1.768870382 | 55  | D4_G6 |
| GO ALPHA AMINO ACID METABOLIC PROCESS                         | Metabolism | 5.09E-05    | 0.002182173 | 0.45592234 | 1.757768073 | 184 | D4_G6 |
| KEGG AMINO SUGAR AND NUCLEOTIDE SUGAR METABOLISM              | Metabolism | 0.000522224 | 0.008074379 | 0.52972847 | 1.756527666 | 46  | D4_G6 |
| KEGG ALANINE ASPARTATE AND GLUTAMATE METABOLISM               | Metabolism | 0.001748798 | 0.015282971 | 0.58378754 | 1.755671708 | 27  | D4_G6 |
| GO MITOCHONDRIAL RNA METABOLIC PROCESS                        | Metabolism | 0.002007788 | 0.016815223 | 0.56389223 | 1.753485294 | 32  | D4_G6 |
| GO CELLULAR MODIFIED AMINO ACID METABOLIC PROCESS             | Metabolism | 5.11E-05    | 0.002182173 | 0.45197254 | 1.734401703 | 170 | D4_G6 |
| KEGG FRUCTOSE AND MANNOSE METABOLISM                          | Metabolism | 0.002173651 | 0.01747615  | 0.54920327 | 1.729803116 | 34  | D4_G6 |
| GO FOLIC ACID CONTAINING COMPOUND METABOLIC PROCESS           | Metabolism | 0.003042596 | 0.021385374 | 0.58454955 | 1.728873353 | 25  | D4_G6 |
| KEGG PYRUVATE METABOLISM                                      | Metabolism | 0.001640593 | 0.014989054 | 0.52580822 | 1.721602158 | 42  | D4_G6 |
| GO GLUTAMINE FAMILY AMINO ACID METABOLIC PROCESS              | Metabolism | 0.000860092 | 0.009811921 | 0.51157173 | 1.717968034 | 50  | D4_G6 |
| REACTOME METABOLISM OF VITAMINS AND COFACTORS                 | Metabolism | 0.001548165 | 0.014818152 | 0.50344861 | 1.69068887  | 50  | D4_G6 |
| GO ALDITOL PHOSPHATE METABOLIC PROCESS                        | Metabolism | 0.005059022 | 0.027871622 | 0.55823901 | 1.67883753  | 27  | D4_G6 |
| GO GLUTATHIONE METABOLIC PROCESS                              | Metabolism | 0.002538364 | 0.019623506 | 0.50140861 | 1.672979539 | 48  | D4_G6 |
| REACTOME PURINE METABOLISM                                    | Metabolism | 0.006626618 | 0.0317131   | 0.54104575 | 1.647352738 | 29  | D4_G6 |
| REACTOME METABOLISM OF AMINO ACIDS AND DERIVATIVES            | Metabolism | 0.00010258  | 0.003436426 | 0.42935128 | 1.638589751 | 158 | D4_G6 |
| GO NEGATIVE REGULATION OF DNA METABOLIC PROCESS               | Metabolism | 0.000206398 | 0.004468206 | 0.4319768  | 1.635310892 | 142 | D4_G6 |
| KEGG GLYCEROPHOSPHOLIPID METABOLISM                           | Metabolism | 0.002855863 | 0.021260313 | 0.47122855 | 1.629473869 | 61  | D4_G6 |
| GO ETHANOLAMINE CONTAINING COMPOUND METABOLIC PROCESS         | Metabolism | 0.003191847 | 0.021385374 | 0.46874493 | 1.620885696 | 61  | D4_G6 |
| GO ONE CARBON METABOLIC PROCESS                               | Metabolism | 0.009599306 | 0.041052353 | 0.53142874 | 1.618071293 | 29  | D4_G6 |
| REACTOME METABOLISM OF NON CODING RNA                         | Metabolism | 0.004453834 | 0.026414915 | 0.47863865 | 1.616808488 | 52  | D4_G6 |
| KEGG ARACHIDONIC ACID METABOLISM                              | Metabolism | 0.008493839 | 0.039703759 | 0.50776842 | 1.61668208  | 36  | D4_G6 |
| GO PYRUVATE METABOLIC PROCESS                                 | Metabolism | 0.004428251 | 0.026414915 | 0.46211935 | 1.595350382 | 60  | D4_G6 |
| GO VITAMIN METABOLIC PROCESS                                  | Metabolism | 0.00131413  | 0.013207002 | 0.42955518 | 1.593657341 | 111 | D4_G6 |
| GO ICOSANOID METABOLIC PROCESS                                | Metabolism | 0.004599612 | 0.026414915 | 0.45526644 | 1.589850506 | 65  | D4_G6 |
| GO FATTY ACID DERIVATIVE METABOLIC PROCESS                    | Metabolism | 0.004599612 | 0.026414915 | 0.45526644 | 1.589850506 | 65  | D4_G6 |
| KEGG FATTY ACID METABOLISM                                    | Metabolism | 0.011240608 | 0.047070047 | 0.49066113 | 1.585544412 | 39  | D4_G6 |
| GO PHOSPHATIDYLCHOLINE METABOLIC PROCESS                      | Metabolism | 0.009319287 | 0.040721232 | 0.47457434 | 1.57763504  | 47  | D4_G6 |
| GO AMINE METABOLIC PROCESS                                    | Metabolism | 0.003127528 | 0.021385374 | 0.43514558 | 1.573847406 | 86  | D4_G6 |
| GO UNSATURATED FATTY ACID METABOLIC PROCESS                   | Metabolism | 0.003750204 | 0.024315838 | 0.43955298 | 1.573104772 | 79  | D4_G6 |
| REACTOME METABOLISM OF NUCLEOTIDES                            | Metabolism | 0.006276496 | 0.03077014  | 0.44241488 | 1.557906987 | 69  | D4_G6 |
| GO MONOSACCHARIDE METABOLIC PROCESS                           | Metabolism | 0.00071207  | 0.009811921 | 0.39391846 | 1.518343075 | 182 | D4_G6 |
| GO OXIDOREDUCTION COENZYME METABOLIC PROCESS                  | Metabolism | 0.008888652 | 0.04060498  | 0.40715838 | 1.49037993  | 97  | D4_G6 |
| GO NUCLEOSIDE TRIPHOSPHATE METABOLIC PROCESS                  | Metabolism | 0.012052446 | 0.049439625 | 0.34612064 | 1.353420104 | 237 | D4_G6 |
| GO AMINOGLYCAN METABOLIC PROCESS                              | Metabolism | 0.005856515 | 0.030183579 | -0.2604401 | -1.42540543 | 137 | D4_G6 |
| REACTOME GLYCOSAMINOGLYCAN METABOLISM                         | Metabolism | 0.009223674 | 0.040721232 | -0.2881539 | -1.4721859  | 93  | D4_G6 |
| GO MULTICELLULAR ORGANISMAL MACROMOLECULE METABOLIC PROCESS   | Metabolism | 0.005130597 | 0.027871622 | -0.3384514 | -1.59339774 | 61  | D4_G6 |
| REACTOME CHONDROITIN SULFATE DERMATAN SULFATE METABOLISM      | Metabolism | 0.005653475 | 0.029903908 | -0.3889408 | -1.67620537 | 41  | D4_G6 |
| REACTOME GLUCAGON SIGNALING IN METABOLIC REGULATION           | Metabolism | 0.00601353  | 0.03021799  | -0.4624265 | -1.77482588 | 27  | D4_G6 |
| GO HEPARAN SULFATE PROTEOGLYCAN METABOLIC PROCESS             | Metabolism | 0.000805369 | 0.009811921 | -0.5059538 | -2.0049497  | 30  | D4_G6 |
| REACTOME HEPARAN SULFATE HEPARIN HS_GAG METABOLISM            | Metabolism | 0.000374813 | 0.006278111 | -0.475714  | -2.1311597  | 48  | D4_G6 |
| GO PROTEOGLYCAN METABOLIC PROCESS                             | Metabolism | 0.000772201 | 0.009811921 | -0.4188229 | -2.14621601 | 94  | D4_G6 |
| GO CATECHOLAMINE METABOLIC PROCESS                            | Metabolism | 0.000508762 | 0.016893596 | 0.6420404  | 1.815380305 | 37  | D4_G7 |
| GO CATECHOL CONTAINING COMPOUND METABOLIC PROCESS             | Metabolism | 0.000508762 | 0.016893596 | 0.6420404  | 1.815380305 | 37  | D4_G7 |
| GO NEUROTRANSMITTER METABOLIC PROCESS                         | Metabolism | 0.001362963 | 0.02274145  | 0.66552672 | 1.79458252  | 27  | D4_G7 |
| GO NEGATIVE REGULATION OF CYCLIC NUCLEOTIDE METABOLIC PROCESS | Metabolism | 0.001811382 | 0.02274145  | 0.64620607 | 1.764947036 | 29  | D4_G7 |
| GO PHENOL CONTAINING COMPOUND METABOLIC PROCESS               | Metabolism | 0.000532595 | 0.016893596 | 0.56982469 | 1.705260256 | 59  | D4_G7 |
| GO CYCLIC NUCLEOTIDE METABOLIC PROCESS                        | Metabolism | 0.002036548 | 0.02274145  | 0.58331347 | 1.691615007 | 45  | D4_G7 |



|                                                                |            |             |             |            |             |     |       |
|----------------------------------------------------------------|------------|-------------|-------------|------------|-------------|-----|-------|
| GO_NEGATIVE_REGULATION_OF_NUCLEOTIDE_METABOLIC_PROCESS         | Metabolism | 0.001665324 | 0.02274145  | 0.56631941 | 1.680129518 | 54  | D4_G7 |
| GO_REGULATION_OF_CAMP_METABOLIC_PROCESS                        | Metabolism | 0.00378536  | 0.033080754 | 0.49324052 | 1.536791517 | 96  | D4_G7 |
| REACTOME_INTEGRATION_OF_ENERGY_METABOLISM                      | Metabolism | 0.001564313 | 0.02274145  | 0.48510019 | 1.535671454 | 132 | D4_G7 |
| GO_REGULATION_OF_CYCLIC_NUCLEOTIDE_METABOLIC_PROCESS           | Metabolism | 0.002028809 | 0.02274145  | 0.48744117 | 1.533977713 | 116 | D4_G7 |
| GO_RECEPTOR_METABOLIC_PROCESS                                  | Metabolism | 0.007399358 | 0.047976485 | 0.49522122 | 1.524033551 | 81  | D4_G7 |
| GO_PROTEOGLYCAN_METABOLIC_PROCESS                              | Metabolism | 0.005275288 | 0.040023895 | 0.4890947  | 1.521591829 | 94  | D4_G7 |
| GO_CELLULAR_METABOLIC_PURINE_NUCLEOTIDE_METABOLIC_PROCESS      | Metabolism | 0.005376344 | 0.040023895 | 0.47373197 | 1.490392205 | 115 | D4_G7 |
| GO_POSITIVE_REGULATION_OF_NUCLEOTIDE_METABOLIC_PROCESS         | Metabolism | 0.005376344 | 0.040023895 | 0.47373197 | 1.490392205 | 115 | D4_G7 |
| KEGG_PURINE_METABOLISM                                         | Metabolism | 0.005780347 | 0.041012038 | -0.2494492 | -1.39880785 | 134 | D4_G7 |
| GO_NEGATIVE_REGULATION_OF_DNA_METABOLIC_PROCESS                | Metabolism | 0.006578947 | 0.044078947 | -0.2762931 | -1.55602052 | 142 | D4_G7 |
| GO_SNRNA_METABOLIC_PROCESS                                     | Metabolism | 0.00591716  | 0.041012038 | -0.3103267 | -1.60999844 | 81  | D4_G7 |
| KEGG_PYRIMIDINE_METABOLISM                                     | Metabolism | 0.002028398 | 0.02274145  | -0.3084208 | -1.63058523 | 92  | D4_G7 |
| GO_VITAMIN_METABOLIC_PROCESS                                   | Metabolism | 0.003289474 | 0.030141962 | -0.3040881 | -1.66705428 | 111 | D4_G7 |
| GO_PYRIMIDINE_NUCLEOTIDE_METABOLIC_PROCESS                     | Metabolism | 0.003186405 | 0.030141962 | -0.3932325 | -1.75979732 | 44  | D4_G7 |
| GO_CELLULAR_METABOLIC_COMPOUND_SALVAGE                         | Metabolism | 0.004976893 | 0.040023895 | -0.4490901 | -1.78694446 | 30  | D4_G7 |
| KEGG_CYSTEINE_AND_METHIONINE_METABOLISM                        | Metabolism | 0.00329912  | 0.030141962 | -0.4532194 | -1.82353214 | 31  | D4_G7 |
| GO_WATER_SOLUBLE_VITAMIN_METABOLIC_PROCESS                     | Metabolism | 0.00147929  | 0.02274145  | -0.3536233 | -1.83462419 | 81  | D4_G7 |
| REACTOME_METABOLISM_OF_NUCLEOTIDES                             | Metabolism | 0.001067236 | 0.021451441 | -0.3714735 | -1.84734705 | 69  | D4_G7 |
| GO_DEOXYRIBONUCLEOTIDE_METABOLIC_PROCESS                       | Metabolism | 0.00249273  | 0.026370455 | -0.4379857 | -1.85058539 | 36  | D4_G7 |
| GO_PIGMENT_METABOLIC_PROCESS                                   | Metabolism | 0.000608273 | 0.016893596 | -0.425762  | -1.95838317 | 49  | D4_G7 |
| GO_PTERIDINE_CONTAINING_COMPOUND_METABOLIC_PROCESS             | Metabolism | 0.00075643  | 0.016893596 | -0.5088155 | -2.07191883 | 32  | D4_G7 |
| REACTOME_PURINE_METABOLISM                                     | Metabolism | 0.000692521 | 0.016893596 | -0.5305216 | -2.08932948 | 29  | D4_G7 |
| GO_MITOCHONDRIAL_RNA_METABOLIC_PROCESS                         | Metabolism | 0.000378215 | 0.016893596 | -0.5401757 | -2.19961885 | 32  | D4_G7 |
| GO_SERINE_FAMILY_AMINO_ACID_METABOLIC_PROCESS                  | Metabolism | 0.000411862 | 0.016893596 | -0.5605501 | -2.33732477 | 35  | D4_G7 |
| REACTOME_METABOLISM_OF_NON_CODING_RNA                          | Metabolism | 0.00066357  | 0.016893596 | -0.5649664 | -2.63785494 | 52  | D4_G7 |
| GO_CATECHOLAMINE_METABOLIC_PROCESS                             | Metabolism | 0.002438249 | 0.01531525  | 0.50068449 | 1.891798915 | 37  | D4_G8 |
| GO_CATECHOL_CONTAINING_COMPOUND_METABOLIC_PROCESS              | Metabolism | 0.002438249 | 0.01531525  | 0.50068449 | 1.891798915 | 37  | D4_G8 |
| GO_PROTEOGLYCAN_METABOLIC_PROCESS                              | Metabolism | 0.002719767 | 0.016411289 | 0.37322567 | 1.72645553  | 94  | D4_G8 |
| REACTOME_METABOLISM_OF_CARBOHYDRATES                           | Metabolism | 0.006341298 | 0.031087825 | -0.2600355 | -1.44632992 | 210 | D4_G8 |
| GO_STEROL_METABOLIC_PROCESS                                    | Metabolism | 0.006785677 | 0.032474311 | -0.312615  | -1.54211297 | 105 | D4_G8 |
| REACTOME_FATTY_ACID_TRIACYLGLYCEROL_AND_KETONE_BODY_METABOLISM | Metabolism | 0.00155521  | 0.011577674 | -0.2907423 | -1.57363251 | 176 | D4_G8 |
| GO_THIOESTER_METABOLIC_PROCESS                                 | Metabolism | 0.009246231 | 0.041299832 | -0.3493465 | -1.58037766 | 69  | D4_G8 |
| GO_ACYL_COA_METABOLIC_PROCESS                                  | Metabolism | 0.009246231 | 0.041299832 | -0.3493465 | -1.58037766 | 69  | D4_G8 |
| GO_AMINE_METABOLIC_PROCESS                                     | Metabolism | 0.007371007 | 0.034455174 | -0.3339382 | -1.5835642  | 86  | D4_G8 |
| GO_SNRNA_METABOLIC_PROCESS                                     | Metabolism | 0.006095703 | 0.030630905 | -0.33885   | -1.58460057 | 81  | D4_G8 |
| GO_NEGATIVE_REGULATION_OF_DNA_METABOLIC_PROCESS                | Metabolism | 0.00151335  | 0.011577674 | -0.3083418 | -1.60862952 | 142 | D4_G8 |
| GO_PORPHYRIN_CONTAINING_COMPOUND_METABOLIC_PROCESS             | Metabolism | 0.01123806  | 0.049105434 | -0.4542549 | -1.6591686  | 29  | D4_G8 |
| KEGG_INOSITOL_PHOSPHATE_METABOLISM                             | Metabolism | 0.00503876  | 0.026652387 | -0.4101786 | -1.69705603 | 47  | D4_G8 |
| KEGG_GLUTATHIONE_METABOLISM                                    | Metabolism | 0.004422652 | 0.024025756 | -0.4221082 | -1.71675595 | 44  | D4_G8 |
| KEGG_CYSTEINE_AND_METHIONINE_METABOLISM                        | Metabolism | 0.005267118 | 0.027145917 | -0.4671598 | -1.73832212 | 31  | D4_G8 |
| KEGG_ARGININE_AND_PROLINE_METABOLISM                           | Metabolism | 0.002321083 | 0.01531525  | -0.4292152 | -1.76644646 | 46  | D4_G8 |
| GO_SULFUR_AMINO_ACID_METABOLIC_PROCESS                         | Metabolism | 0.002857687 | 0.016411289 | -0.4426205 | -1.76939099 | 41  | D4_G8 |
| GO_GLUTAMINE_FAMILY_AMINO_ACID_METABOLIC_PROCESS               | Metabolism | 0.002234311 | 0.01531525  | -0.4210537 | -1.7696271  | 50  | D4_G8 |
| REACTOME_METABOLISM_OF_AMINO_ACIDS_AND_DERIVATIVES             | Metabolism | 0.000110412 | 0.001619531 | -0.3342678 | -1.77556751 | 158 | D4_G8 |
| GO_PYRIMIDINE_NUCLEOTIDE_METABOLIC_PROCESS                     | Metabolism | 0.00230747  | 0.01531525  | -0.438004  | -1.7814058  | 44  | D4_G8 |
| GO_POSITIVE_REGULATION_OF_DNA_METABOLIC_PROCESS                | Metabolism | 0.000112803 | 0.001619531 | -0.3228003 | -1.79042903 | 206 | D4_G8 |
| GO_MULTI_ORGANISM_METABOLIC_PROCESS                            | Metabolism | 0.000112233 | 0.001619531 | -0.3238035 | -1.7939022  | 203 | D4_G8 |
| GO_ASPARTATE_FAMILY_AMINO_ACID_METABOLIC_PROCESS               | Metabolism | 0.000982994 | 0.008980992 | -0.4182704 | -1.79807628 | 55  | D4_G8 |
| GO_MITOCHONDRIAL_RNA_METABOLIC_PROCESS                         | Metabolism | 0.002814787 | 0.016411289 | -0.4796582 | -1.80145132 | 32  | D4_G8 |
| GO_HEME_METABOLIC_PROCESS                                      | Metabolism | 0.003221057 | 0.017984232 | -0.5170989 | -1.81344973 | 25  | D4_G8 |
| KEGG_AMINO_SUGAR_AND_NUCLEOTIDE_SUGAR_METABOLISM               | Metabolism | 0.001257253 | 0.010790539 | -0.443172  | -1.82388594 | 46  | D4_G8 |
| GO_PIGMENT_METABOLIC_PROCESS                                   | Metabolism | 0.000777529 | 0.008225443 | -0.442873  | -1.84925563 | 49  | D4_G8 |

|                                                                                                    |            |             |             |            |             |     |       |
|----------------------------------------------------------------------------------------------------|------------|-------------|-------------|------------|-------------|-----|-------|
| GO_CELLULAR_MODIFIED_AMINO_ACID_METABOLIC_PROCESS                                                  | Metabolism | 0.000110084 | 0.001619531 | -0.3437414 | -1.85042555 | 170 | D4_G8 |
| GO_PTERIDINE_CONTAINING_COMPOUND_METABOLIC_PROCESS                                                 | Metabolism | 0.00150122  | 0.011577674 | -0.4948913 | -1.85866241 | 32  | D4_G8 |
| KEGG_PYRIMIDINE_METABOLISM                                                                         | Metabolism | 0.00010287  | 0.001619531 | -0.3892665 | -1.87313948 | 92  | D4_G8 |
| GO_PYRIMIDINE_CONTAINING_COMPOUND_METABOLIC_PROCESS                                                | Metabolism | 0.000201045 | 0.002694009 | -0.420986  | -1.88989859 | 67  | D4_G8 |
| KEGG_PURINE_METABOLISM                                                                             | Metabolism | 0.000107032 | 0.001619531 | -0.3665129 | -1.89353903 | 134 | D4_G8 |
| GO_FOLIC_ACID_CONTAINING_COMPOUND_METABOLIC_PROCESS                                                | Metabolism | 0.001288423 | 0.010790539 | -0.541164  | -1.89784544 | 25  | D4_G8 |
| GO_NUCLEOBASE_METABOLIC_PROCESS                                                                    | Metabolism | 0.000852919 | 0.008571835 | -0.4866462 | -1.90664876 | 38  | D4_G8 |
| GO_DICARBOXYLIC_ACID_METABOLIC_PROCESS                                                             | Metabolism | 0.000102375 | 0.001619531 | -0.4052779 | -1.92186363 | 86  | D4_G8 |
| GO_ONE_CARBON_METABOLIC_PROCESS                                                                    | Metabolism | 0.000936505 | 0.00896369  | -0.5265844 | -1.92335255 | 29  | D4_G8 |
| GO_VITAMIN_METABOLIC_PROCESS                                                                       | Metabolism | 0.000104362 | 0.001619531 | -0.390831  | -1.94844257 | 111 | D4_G8 |
| GO_CELLULAR_METABOLIC_COMPOUND_SALVAGE                                                             | Metabolism | 0.000748643 | 0.008225443 | -0.5280293 | -1.94916279 | 30  | D4_G8 |
| GO_SERINE_FAMILY_AMINO_ACID_METABOLIC_PROCESS                                                      | Metabolism | 0.000471921 | 0.005928504 | -0.527904  | -2.02770923 | 35  | D4_G8 |
| REACTOME_PURINE_METABOLISM                                                                         | Metabolism | 0.000561903 | 0.006643676 | -0.5580788 | -2.03838607 | 29  | D4_G8 |
| GO_WATER_SOLUBLE_VITAMIN_METABOLIC_PROCESS                                                         | Metabolism | 0.000101595 | 0.001619531 | -0.4393662 | -2.05465569 | 81  | D4_G8 |
| REACTOME_METABOLISM_OF_VITAMINS_AND_COFACTORS                                                      | Metabolism | 9.71E-05    | 0.001619531 | -0.4909536 | -2.06340635 | 50  | D4_G8 |
| GO_ALPHA_AMINO_ACID_METABOLIC_PROCESS                                                              | Metabolism | 0.000111844 | 0.001619531 | -0.3846393 | -2.09657497 | 184 | D4_G8 |
| REACTOME_METABOLISM_OF_NUCLEOTIDES                                                                 | Metabolism | 0.000100503 | 0.001619531 | -0.4687333 | -2.12046116 | 69  | D4_G8 |
| REACTOME_METABOLISM_OF_NON_CODING_RNA                                                              | Metabolism | 9.76E-05    | 0.001619531 | -0.5100324 | -2.16566924 | 52  | D4_G8 |
| GO_TRNA_METABOLIC_PROCESS                                                                          | Metabolism | 0.000110412 | 0.001619531 | -0.4218252 | -2.27288677 | 171 | D4_G8 |
| GO_T_CELL_RECEPTOR_SIGNALING_PATHWAY                                                               | Signaling  | 0.000268817 | 0.023038536 | 0.39939575 | 1.704538878 | 140 | D4_G1 |
| REACTOME_DOWNSTREAM_SIGNALING_EVENTS_OF_B_CELL_RECEPTOR_BCR                                        | Signaling  | 0.00049903  | 0.023038536 | 0.41259303 | 1.703035351 | 106 | D4_G1 |
| GO_NIK_NF_KAPPAB_SIGNALING                                                                         | Signaling  | 0.001356622 | 0.031315358 | 0.41537643 | 1.673901944 | 89  | D4_G1 |
| GO_INNATE_IMMUNE_RESPONSE_ACTIVATING_CELL_SURFACE_RECEPTOR_SIGNALING_PATHWAY                       | Signaling  | 0.00171888  | 0.033813477 | 0.39297928 | 1.622076863 | 106 | D4_G1 |
| KEGG_CHEMOKINE_SIGNALING_PATHWAY                                                                   | Signaling  | 0.001711047 | 0.033813477 | 0.36291742 | 1.559478433 | 149 | D4_G1 |
| REACTOME_SIGNALING_BY_THE_B_CELL_RECEPTOR_BCR                                                      | Signaling  | 0.002421308 | 0.037261232 | 0.3629449  | 1.547875853 | 139 | D4_G1 |
| GO_SIGNAL_RELEASE                                                                                  | Signaling  | 0.001953125 | 0.033813477 | -0.2578623 | -1.50859172 | 177 | D4_G1 |
| GO_REGULATION_OF_TRANSFORMING_GROWTH_FACTOR_BETA_RECEPTOR_SIGNALING_PATHWAY                        | Signaling  | 0.002117149 | 0.034497073 | -0.2718839 | -1.53193363 | 139 | D4_G1 |
| GO_REGULATION_OF_EXTRINSIC_APOPTOTIC_SIGNALING_PATHWAY_IN_ABSENCE_OF_LIGAND                        | Signaling  | 0.00103484  | 0.026059143 | -0.3555438 | -1.73309725 | 65  | D4_G1 |
| GO_REGULATION_OF_NOTCH_SIGNALING_PATHWAY                                                           | Signaling  | 0.000344947 | 0.023038536 | -0.3706164 | -1.80656848 | 65  | D4_G1 |
| GO_NEGATIVE_REGULATION_OF_EXTRINSIC_APOPTOTIC_SIGNALING_PATHWAY_IN_ABSENCE_OF_LIGAND               | Signaling  | 0.000823723 | 0.02535237  | -0.4139695 | -1.86248434 | 45  | D4_G1 |
| GO_NEGATIVE_REGULATION_OF_SIGNAL_TRANSDUCTION_IN_ABSENCE_OF_LIGAND                                 | Signaling  | 0.000823723 | 0.02535237  | -0.4139695 | -1.86248434 | 45  | D4_G1 |
| GO_POSITIVE_REGULATION_OF_TRANSMEMBRANE_RECEPTOR_PROTEIN_SERINE_THREONINE_KINASE_SIGNALING_PATHWAY | Signaling  | 0.001016777 | 0.026059143 | -0.3514343 | -1.88424216 | 106 | D4_G1 |
| REACTOME_CRMP5_IN_SEMA3A_SIGNALING                                                                 | Signaling  | 0.001898334 | 0.033813477 | -0.4951305 | -1.94216934 | 26  | D4_G1 |
| GO_POSITIVE_REGULATION_OF_NOTCH_SIGNALING_PATHWAY                                                  | Signaling  | 0.000727626 | 0.02535237  | -0.4596691 | -1.94628233 | 35  | D4_G1 |
| GO_REGULATION_OF_BMP_SIGNALING_PATHWAY                                                             | Signaling  | 0.000454959 | 0.023038536 | -0.395124  | -2.07168901 | 93  | D4_G1 |
| GO_POSITIVE_REGULATION_OF_SMOOTHENED_SIGNALING_PATHWAY                                             | Signaling  | 0.000242542 | 0.023038536 | -0.5199027 | -2.20131736 | 35  | D4_G1 |
| GO_POSITIVE_REGULATION_OF_BMP_SIGNALING_PATHWAY                                                    | Signaling  | 0.000252461 | 0.023038536 | -0.5441454 | -2.35096791 | 38  | D4_G1 |
| GO_POSITIVE_REGULATION_OF_SMOOTHENED_SIGNALING_PATHWAY                                             | Signaling  | 0.00011854  | 0.002756877 | 0.64157996 | 2.304338087 | 35  | D4_G2 |
| REACTOME_G_ALPHA_I_SIGNALING_EVENTS                                                                | Signaling  | 0.000117343 | 0.002756877 | 0.52583156 | 2.242513522 | 79  | D4_G2 |
| GO_TRANSMEMBRANE_RECEPTOR_PROTEIN_SERINE_THREONINE_KINASE_SIGNALING_PATHWAY                        | Signaling  | 0.000118273 | 0.002756877 | 0.42912117 | 2.13900955  | 212 | D4_G2 |
| GO_SMAD_PROTEIN_SIGNAL_TRANSDUCTION                                                                | Signaling  | 0.000236379 | 0.003478632 | 0.56433232 | 2.119688032 | 42  | D4_G2 |
| GO_NEGATIVE_REGULATION_OF_TRANSMEMBRANE_RECEPTOR_PROTEIN_SERINE_THREONINE_KINASE_SIGNALING_PATHWAY | Signaling  | 0.000117994 | 0.002756877 | 0.43987956 | 2.062217447 | 138 | D4_G2 |
| GO_INTEGRIN_MEDIATED_SIGNALING_PATHWAY                                                             | Signaling  | 0.000118175 | 0.002756877 | 0.46954864 | 2.058538388 | 93  | D4_G2 |
| REACTOME_G_ALPHA_Z_SIGNALING_EVENTS                                                                | Signaling  | 0.000472646 | 0.005951038 | 0.55832845 | 2.057762538 | 39  | D4_G2 |
| GO_POSITIVE_REGULATION_OF_TRANSMEMBRANE_RECEPTOR_PROTEIN_SERINE_THREONINE_KINASE_SIGNALING_PATHWAY | Signaling  | 0.000117702 | 0.002756877 | 0.44788975 | 2.008772987 | 106 | D4_G2 |
| KEGG_TGF_BETA_SIGNALING_PATHWAY                                                                    | Signaling  | 0.000235905 | 0.003478632 | 0.46604028 | 1.964903402 | 75  | D4_G2 |
| GO_REGULATION_OF_SMOOTHENED_SIGNALING_PATHWAY                                                      | Signaling  | 0.000234797 | 0.003478632 | 0.45135908 | 1.935822068 | 81  | D4_G2 |
| GO_REGULATION_OF_BMP_SIGNALING_PATHWAY                                                             | Signaling  | 0.000118175 | 0.002756877 | 0.44115018 | 1.934037329 | 93  | D4_G2 |
| GO_NEGATIVE_REGULATION_OF_WNT_SIGNALING_PATHWAY                                                    | Signaling  | 0.000119432 | 0.002756877 | 0.3846663  | 1.93077215  | 227 | D4_G2 |
| GO_NEGATIVE_REGULATION_OF_TRANSFORMING_GROWTH_FACTOR_BETA_RECEPTOR_SIGNALING_PATHWAY               | Signaling  | 0.000117911 | 0.002756877 | 0.43202936 | 1.905925144 | 96  | D4_G2 |
| GO_ADENYLATE_CYCLASE_ACTIVATING_G_PROTEIN_COUPLED_RECEPTOR_SIGNALING_PATHWAY                       | Signaling  | 0.000823433 | 0.009123633 | 0.48878413 | 1.898574757 | 49  | D4_G2 |
| GO_POSITIVE_REGULATION_OF_TOLL_LIKE_RECEPTOR_SIGNALING_PATHWAY                                     | Signaling  | 0.001532296 | 0.014203447 | 0.5342754  | 1.897501571 | 33  | D4_G2 |

|                                                                                                    |           |             |             |            |             |     |       |
|----------------------------------------------------------------------------------------------------|-----------|-------------|-------------|------------|-------------|-----|-------|
| GO LIPOPOLYSACCHARIDE MEDIATED SIGNALING PATHWAY                                                   | Signaling | 0.00223951  | 0.01732983  | 0.5289845  | 1.878710717 | 33  | D4_G2 |
| GO REGULATION_OF_SYSTEMIC_ARTERIAL_BLOOD_PRESSURE_MEDIATED_BY_A_CHEMICAL_SIGNAL                    | Signaling | 0.001538279 | 0.014203447 | 0.51627669 | 1.87641126  | 37  | D4_G2 |
| GO TOLL LIKE RECEPTOR SIGNALING PATHWAY                                                            | Signaling | 0.000235682 | 0.003478632 | 0.42415981 | 1.856375135 | 92  | D4_G2 |
| GO REGULATION_OF_VASCULAR_ENDOTHELIAL_GROWTH_FACTOR_RECEPTOR_SIGNALING_PATHWAY                     | Signaling | 0.002252252 | 0.01732983  | 0.51480797 | 1.849016006 | 35  | D4_G2 |
| GO_PATTERN_RECOGNITION_RECEPTOR_SIGNALING_PATHWAY                                                  | Signaling | 0.000117426 | 0.002756877 | 0.40493577 | 1.831511486 | 111 | D4_G2 |
| GO G PROTEIN COUPLED RECEPTOR SIGNALING PATHWAY COUPLED TO CYCLIC NUCLEOTIDE SECOND MESSENGER      | Signaling | 0.000471476 | 0.005951038 | 0.41506257 | 1.824851014 | 94  | D4_G2 |
| GO NOTCH SIGNALING PATHWAY                                                                         | Signaling | 0.000118751 | 0.002756877 | 0.39357971 | 1.818249314 | 127 | D4_G2 |
| GO_NEGATIVE_REGULATION_OF_BMP_SIGNALING_PATHWAY                                                    | Signaling | 0.001641844 | 0.014264065 | 0.46080392 | 1.806985394 | 51  | D4_G2 |
| GO_VASCULAR_ENDOTHELIAL_GROWTH_FACTOR_RECEPTOR_SIGNALING_PATHWAY                                   | Signaling | 0.00047081  | 0.005951038 | 0.41416877 | 1.796509987 | 87  | D4_G2 |
| REACTOME_G_ALPHA_Q_SIGNALLING_EVENTS                                                               | Signaling | 0.000706215 | 0.008150895 | 0.40952818 | 1.77638084  | 87  | D4_G2 |
| GO_TRANSFORMING_GROWTH_FACTOR_BETA_RECEPTOR_SIGNALING_PATHWAY                                      | Signaling | 0.000118948 | 0.002756877 | 0.37940508 | 1.745644436 | 124 | D4_G2 |
| GO_REGULATION_OF_TRANSFORMING_GROWTH_FACTOR_BETA_RECEPTOR_SIGNALING_PATHWAY                        | Signaling | 0.000590249 | 0.007108652 | 0.36207752 | 1.699393957 | 139 | D4_G2 |
| GO_POSITIVE_REGULATION_OF_EXTRINSIC_APOPTOTIC_SIGNALING_PATHWAY                                    | Signaling | 0.003992016 | 0.029099695 | 0.42479241 | 1.691759824 | 55  | D4_G2 |
| GO MYD88 DEPENDENT TOLL LIKE RECEPTOR SIGNALING PATHWAY                                            | Signaling | 0.006619385 | 0.043656422 | 0.4450769  | 1.687969782 | 44  | D4_G2 |
| GO_ADENYLATE_CYCLASE_MODULATING_G_PROTEIN_COUPLED_RECEPTOR_SIGNALING_PATHWAY                       | Signaling | 0.001647834 | 0.014264065 | 0.3858343  | 1.673605587 | 87  | D4_G2 |
| REACTOME_GASTRIN_CREB_SIGNALLING_PATHWAY_VIA_PKC_AND_MAPK                                          | Signaling | 0.001531574 | 0.014203447 | 0.36089838 | 1.648798758 | 118 | D4_G2 |
| GO_POSITIVE_REGULATION_OF_WNT_SIGNALING_PATHWAY                                                    | Signaling | 0.000238607 | 0.003478632 | 0.3313704  | 1.630539605 | 195 | D4_G2 |
| GO_EXTRINSIC_APOPTOTIC_SIGNALING_PATHWAY                                                           | Signaling | 0.00199718  | 0.016271147 | 0.35986516 | 1.629994463 | 112 | D4_G2 |
| GO_REGULATION_OF_PHOSPHATIDYLINOSITOL_3_KINASE_SIGNALING                                           | Signaling | 0.001184273 | 0.012671061 | 0.34865965 | 1.627070279 | 135 | D4_G2 |
| GO_RHO_PROTEIN_SIGNAL_TRANSDUCTION                                                                 | Signaling | 0.00471087  | 0.032622777 | 0.39366376 | 1.6262599   | 67  | D4_G2 |
| GO_NEGATIVE_REGULATION_OF_CANONICAL_WNT_SIGNALING_PATHWAY                                          | Signaling | 0.000237869 | 0.003478632 | 0.33143963 | 1.625687399 | 190 | D4_G2 |
| REACTOME_NCAM_SIGNALING_FOR_NEURITE_OUT_GROWTH                                                     | Signaling | 0.003875514 | 0.029013982 | 0.37700111 | 1.612795857 | 80  | D4_G2 |
| GO_REGULATION_OF_EXTRINSIC_APOPTOTIC_SIGNALING_PATHWAY_IN_ABSENCE_OF_LIGAND                        | Signaling | 0.006499645 | 0.043656422 | 0.38901604 | 1.599119633 | 65  | D4_G2 |
| REACTOME_SIGNALING_BY_PDGF                                                                         | Signaling | 0.001769912 | 0.01485653  | 0.34034377 | 1.595579631 | 138 | D4_G2 |
| GO_REGULATION_OF_EXTRINSIC_APOPTOTIC_SIGNALING_PATHWAY                                             | Signaling | 0.001436954 | 0.014203447 | 0.3156946  | 1.531838314 | 176 | D4_G2 |
| GO_SIGNAL_TRANSDUCTION_IN_RESPONSE_TO_DNA_DAMAGE                                                   | Signaling | 0.004510365 | 0.032035158 | -0.3462438 | -1.55048616 | 116 | D4_G2 |
| GO_REGULATION_OF_SIGNAL_TRANSDUCTION_BY_P53_CLASS_MEDIATOR                                         | Signaling | 0.000172265 | 0.003478632 | -0.3573164 | -1.71377784 | 183 | D4_G2 |
| GO_POSITIVE_REGULATION_OF_BMP_SIGNALING_PATHWAY                                                    | Signaling | 0.000309151 | 0.015853393 | 0.55146472 | 1.982083178 | 38  | D4_G3 |
| GO_NEGATIVE_REGULATION_OF_EXTRINSIC_APOPTOTIC_SIGNALING_PATHWAY_IN_ABSENCE_OF_LIGAND               | Signaling | 0.000412116 | 0.015853393 | 0.5108447  | 1.907099316 | 45  | D4_G3 |
| GO_NEGATIVE_REGULATION_OF_SIGNAL_TRANSDUCTION_IN_ABSENCE_OF_LIGAND                                 | Signaling | 0.000412116 | 0.015853393 | 0.5108447  | 1.907099316 | 45  | D4_G3 |
| GO_SMOOTHENED_SIGNALING_PATHWAY                                                                    | Signaling | 0.000103605 | 0.014349358 | 0.44787985 | 1.867186268 | 81  | D4_G3 |
| GO_REGULATION_OF_EXTRINSIC_APOPTOTIC_SIGNALING_PATHWAY_IN_ABSENCE_OF_LIGAND                        | Signaling | 0.000515092 | 0.015853393 | 0.45107287 | 1.808156532 | 65  | D4_G3 |
| GO_REGULATION_OF_BMP_SIGNALING_PATHWAY                                                             | Signaling | 0.000207361 | 0.015853393 | 0.41217032 | 1.761775157 | 93  | D4_G3 |
| GO_REGULATION_OF_SMOOTHENED_SIGNALING_PATHWAY                                                      | Signaling | 0.001036055 | 0.028698715 | 0.39855755 | 1.661564317 | 81  | D4_G3 |
| GO_MULTICELLULAR_ORGANISMAL_SIGNALING                                                              | Signaling | 0.00048459  | 0.015853393 | -0.3719586 | -1.65992709 | 122 | D4_G3 |
| GO_T_CELL_RECEPTOR_SIGNALING_PATHWAY                                                               | Signaling | 9.68E-05    | 0.014349358 | -0.3915057 | -1.78529691 | 140 | D4_G3 |
| GO_FC_GAMMA_RECEPTOR_SIGNALING_PATHWAY                                                             | Signaling | 0.000288656 | 0.015853393 | -0.4266943 | -1.80013331 | 86  | D4_G3 |
| GO_SIGNAL_RELEASE                                                                                  | Signaling | 6.91E-05    | 0.019150996 | 0.40782927 | 1.910023984 | 177 | D4_G4 |
| KEGG_PHOSPHATIDYLINOSITOL_SIGNALING_SYSTEM                                                         | Signaling | 0.00225051  | 0.042387146 | 0.47375626 | 1.7589024   | 64  | D4_G5 |
| KEGG_WNT_SIGNALING_PATHWAY                                                                         | Signaling | 0.003280841 | 0.043271108 | -0.2916858 | -1.48172505 | 151 | D4_G5 |
| GO_POSITIVE_REGULATION_OF_CANONICAL_WNT_SIGNALING_PATHWAY                                          | Signaling | 0.002454322 | 0.042387146 | -0.292177  | -1.48753044 | 152 | D4_G5 |
| GO_POSITIVE_REGULATION_OF_WNT_SIGNALING_PATHWAY                                                    | Signaling | 0.000329598 | 0.013504949 | -0.2868467 | -1.51692506 | 195 | D4_G5 |
| GO_NOTCH_SIGNALING_PATHWAY                                                                         | Signaling | 0.000741107 | 0.019189802 | -0.3251247 | -1.60880526 | 127 | D4_G5 |
| GO_ADENYLATE_CYCLASE_MODULATING_G_PROTEIN_COUPLED_RECEPTOR_SIGNALING_PATHWAY                       | Signaling | 0.002171338 | 0.042387146 | -0.35029   | -1.62338569 | 87  | D4_G5 |
| GO_G_PROTEIN_COUPLED_RECEPTOR_SIGNALING_PATHWAY_COUPLED_TO_CYCLIC_NUCLEOTIDE_SECOND_MESSENGER      | Signaling | 0.000413394 | 0.013504949 | -0.3551089 | -1.66799444 | 94  | D4_G5 |
| KEGG_HEDGEHOG_SIGNALING_PATHWAY                                                                    | Signaling | 0.004096424 | 0.049335187 | -0.4048099 | -1.67132473 | 51  | D4_G5 |
| GO_POSITIVE_REGULATION_OF_TRANSMEMBRANE_RECEPTOR_PROTEIN_SERINE_THREONINE_KINASE_SIGNALING_PATHWAY | Signaling | 0.000438789 | 0.013504949 | -0.3487664 | -1.67319674 | 106 | D4_G5 |
| GO_CAMP_MEDIATED_SIGNALING                                                                         | Signaling | 0.003672533 | 0.046240523 | -0.4286317 | -1.71701733 | 45  | D4_G5 |
| GO_NEGATIVE_REGULATION_OF_EXTRINSIC_APOPTOTIC_SIGNALING_PATHWAY_IN_ABSENCE_OF_LIGAND               | Signaling | 0.003060444 | 0.042387146 | -0.4311311 | -1.72702921 | 45  | D4_G5 |
| GO_NEGATIVE_REGULATION_OF_SIGNAL_TRANSDUCTION_IN_ABSENCE_OF_LIGAND                                 | Signaling | 0.003060444 | 0.042387146 | -0.4311311 | -1.72702921 | 45  | D4_G5 |
| GO_REGULATION_OF_SMOOTHENED_SIGNALING_PATHWAY                                                      | Signaling | 0.00076205  | 0.019189802 | -0.3809867 | -1.73852355 | 81  | D4_G5 |
| GO_NEGATIVE_REGULATION_OF_SMOOTHENED_SIGNALING_PATHWAY                                             | Signaling | 0.002934507 | 0.042387146 | -0.505902  | -1.7945195  | 28  | D4_G5 |

|                                                                                                    |           |             |             |            |             |     |       |
|----------------------------------------------------------------------------------------------------|-----------|-------------|-------------|------------|-------------|-----|-------|
| PID_WNT_SIGNALING_PATHWAY                                                                          | Signaling | 0.002625397 | 0.042387146 | -0.4940007 | -1.79799883 | 31  | D4_G5 |
| GO_CYCLIC_NUCLEOTIDE_MEDIATED_SIGNALING                                                            | Signaling | 0.001319479 | 0.030457969 | -0.4260031 | -1.80629721 | 57  | D4_G5 |
| REACTOME_CRMP5_IN_SEMA3A_SIGNALING                                                                 | Signaling | 0.002899315 | 0.042387146 | -0.5218601 | -1.80836156 | 26  | D4_G5 |
| GO_NEGATIVE_REGULATION_OF_CANONICAL_WNT_SIGNALING_PATHWAY                                          | Signaling | 0.00031837  | 0.013504949 | -0.3514928 | -1.85469883 | 190 | D4_G5 |
| GO_NEGATIVE_REGULATION_OF_WNT_SIGNALING_PATHWAY                                                    | Signaling | 0.000380807 | 0.013504949 | -0.3523274 | -1.89501709 | 227 | D4_G5 |
| GO_REGULATION_OF_BMP_SIGNALING_PATHWAY                                                             | Signaling | 0.000206526 | 0.013504949 | -0.4147912 | -1.94341716 | 93  | D4_G5 |
| GO_SMOOTHENED_SIGNALING_PATHWAY                                                                    | Signaling | 0.000190512 | 0.013504949 | -0.4268114 | -1.94763148 | 81  | D4_G5 |
| GO_POSITIVE_REGULATION_OF_SMOOTHENED_SIGNALING_PATHWAY                                             | Signaling | 0.000141603 | 0.013504949 | -0.548503  | -2.0629813  | 35  | D4_G5 |
| GO_POSITIVE_REGULATION_OF_BMP_SIGNALING_PATHWAY                                                    | Signaling | 0.000144655 | 0.013504949 | -0.5445222 | -2.09320046 | 38  | D4_G5 |
| GO_INTRINSIC_APOPTOTIC_SIGNALING_PATHWAY_IN_RESPONSE_TO_DNA_DAMAGE_BY_P53_CLASS_MEDIATOR           | Signaling | 0.001698102 | 0.03618263  | 0.55380753 | 1.749904438 | 35  | D4_G6 |
| GO_NEGATIVE_REGULATION_OF_EXTRINSIC_APOPTOTIC_SIGNALING_PATHWAY_IN_ABSENCE_OF_LIGAND               | Signaling | 0.001391788 | 0.034633658 | -0.4129416 | -1.81362615 | 45  | D4_G6 |
| GO_NEGATIVE_REGULATION_OF_SIGNAL_TRANSDUCTION_IN_ABSENCE_OF_LIGAND                                 | Signaling | 0.001391788 | 0.034633658 | -0.4129416 | -1.81362615 | 45  | D4_G6 |
| GO_REGULATION_OF_EXTRINSIC_APOPTOTIC_SIGNALING_PATHWAY_IN_ABSENCE_OF_LIGAND                        | Signaling | 0.000988631 | 0.030427857 | -0.3894422 | -1.85928155 | 65  | D4_G6 |
| KEGG_HEDGEHOG_SIGNALING_PATHWAY                                                                    | Signaling | 0.000783392 | 0.030427857 | -0.4170603 | -1.88766567 | 51  | D4_G6 |
| GO_NEGATIVE_REGULATION_OF_SMOOTHENED_SIGNALING_PATHWAY                                             | Signaling | 0.001500375 | 0.034633658 | -0.4928063 | -1.91961182 | 28  | D4_G6 |
| GO_POSITIVE_REGULATION_OF_TRANSMEMBRANE_RECEPTOR_PROTEIN_SERINE_THREONINE_KINASE_SIGNALING_PATHWAY | Signaling | 0.000980392 | 0.030427857 | -0.3773511 | -1.96570976 | 106 | D4_G6 |
| GO_SMOOTHENED_SIGNALING_PATHWAY                                                                    | Signaling | 0.000639795 | 0.030427857 | -0.4061572 | -2.02207742 | 81  | D4_G6 |
| REACTOME_CRMP5_IN_SEMA3A_SIGNALING                                                                 | Signaling | 0.000242131 | 0.028141827 | -0.5476399 | -2.08818597 | 26  | D4_G6 |
| GO_REGULATION_OF_BMP_SIGNALING_PATHWAY                                                             | Signaling | 0.00078064  | 0.030427857 | -0.4093108 | -2.0976386  | 93  | D4_G6 |
| GO_REGULATION_OF_SMOOTHENED_SIGNALING_PATHWAY                                                      | Signaling | 0.000639795 | 0.030427857 | -0.4353415 | -2.16737321 | 81  | D4_G6 |
| GO_POSITIVE_REGULATION_OF_BMP_SIGNALING_PATHWAY                                                    | Signaling | 0.000304785 | 0.028141827 | -0.5781906 | -2.440514   | 38  | D4_G6 |
| GO_POSITIVE_REGULATION_OF_SMOOTHENED_SIGNALING_PATHWAY                                             | Signaling | 0.000284657 | 0.028141827 | -0.6340429 | -2.63022386 | 35  | D4_G6 |
| GO_SIGNAL_RELEASE                                                                                  | Signaling | 5.02E-05    | 0.002910581 | 0.68132323 | 2.181371476 | 177 | D4_G7 |
| GO_NEUROPEPTIDE_SIGNALING_PATHWAY                                                                  | Signaling | 0.000112227 | 0.004132848 | 0.68873184 | 1.965660728 | 39  | D4_G7 |
| GO_GLUTAMATE_RECEPTOR_SIGNALING_PATHWAY                                                            | Signaling | 0.000112227 | 0.004132848 | 0.68449416 | 1.953566292 | 39  | D4_G7 |
| REACTOME_CRMP5_IN_SEMA3A_SIGNALING                                                                 | Signaling | 0.00011936  | 0.004132848 | 0.71847382 | 1.925976258 | 26  | D4_G7 |
| GO_MULTICELLULAR_ORGANISMAL_SIGNALING                                                              | Signaling | 5.05E-05    | 0.002910581 | 0.59959143 | 1.894519545 | 122 | D4_G7 |
| GO_CELL_SURFACE_RECEPTOR_SIGNALING_PATHWAY_INVOLVED_IN_CELL_CELL_SIGNALING                         | Signaling | 5.25E-05    | 0.002910581 | 0.61020407 | 1.854225566 | 68  | D4_G7 |
| GO_SEMAPHORIN_PLEXIN_SIGNALING_PATHWAY                                                             | Signaling | 0.000282694 | 0.00783061  | 0.64847661 | 1.836397618 | 37  | D4_G7 |
| GO_REGULATION_OF_G_PROTEIN_COUPLED_RECEPTOR_PROTEIN_SIGNALING_PATHWAY                              | Signaling | 5.08E-05    | 0.002910581 | 0.58189047 | 1.829761759 | 111 | D4_G7 |
| REACTOME_SIGNALING_BY_ROBO_RECEPTOR                                                                | Signaling | 0.000626495 | 0.013349164 | 0.64284123 | 1.806521452 | 35  | D4_G7 |
| GO_CELL_CELL_SIGNALING_INVOLVED_IN_CARDIAC_CONDUCTION                                              | Signaling | 0.001050175 | 0.018181155 | 0.65290976 | 1.792878546 | 30  | D4_G7 |
| GO_NEGATIVE_REGULATION_OF_G_PROTEIN_COUPLED_RECEPTOR_PROTEIN_SIGNALING_PATHWAY                     | Signaling | 0.000911266 | 0.016828037 | 0.63629804 | 1.788133679 | 35  | D4_G7 |
| GO_CYCLIC_NUCLEOTIDE_MEDIATED_SIGNALING                                                            | Signaling | 0.000320941 | 0.008081889 | 0.5893863  | 1.760328742 | 57  | D4_G7 |
| REACTOME_G_ALPHA_I_SIGNALING_EVENTS                                                                | Signaling | 0.000259121 | 0.00783061  | 0.56173505 | 1.72701829  | 79  | D4_G7 |
| GO_CAMP_MEDIATED_SIGNALING                                                                         | Signaling | 0.002357456 | 0.034369229 | 0.58447236 | 1.701049657 | 45  | D4_G7 |
| GO_SIGNALING_ADAPTOR_ACTIVITY                                                                      | Signaling | 0.001151109 | 0.01875631  | 0.54611667 | 1.663565779 | 70  | D4_G7 |
| GO_POSITIVE_REGULATION_OF_SMALL_GTPASE_MEDIATED_SIGNAL_TRANSDUCTION                                | Signaling | 0.00254723  | 0.035279134 | 0.54582018 | 1.642123942 | 61  | D4_G7 |
| GO_ADENYLATE_CYCLASE_MODULATING_G_PROTEIN_COUPLED_RECEPTOR_SIGNALING_PATHWAY                       | Signaling | 0.000720239 | 0.014250437 | 0.52637391 | 1.630611527 | 87  | D4_G7 |
| GO_G_PROTEIN_COUPLED_RECEPTOR_SIGNALING_PATHWAY_COUPLED_TO_CYCLIC_NUCLEOTIDE_SECOND_MESSENGER      | Signaling | 0.000460547 | 0.010630949 | 0.52249889 | 1.626136484 | 94  | D4_G7 |
| GO_SECOND_MESSENGER_MEDIATED_SIGNALING                                                             | Signaling | 5.02E-05    | 0.002910581 | 0.5006     | 1.602459001 | 176 | D4_G7 |
| KEGG_MAPK_SIGNALING_PATHWAY                                                                        | Signaling | 0.001350743 | 0.020786433 | 0.43856996 | 1.415068254 | 244 | D4_G7 |
| GO_SIGNAL_TRANSDUCTION_IN_RESPONSE_TO_DNA_DAMAGE                                                   | Signaling | 0.003731343 | 0.046981004 | -0.281066  | -1.56266126 | 116 | D4_G7 |
| KEGG_P53_SIGNALING_PATHWAY                                                                         | Signaling | 0.003512881 | 0.046336567 | -0.3489019 | -1.74896457 | 71  | D4_G7 |
| GO_NEGATIVE_REGULATION_OF_NOTCH_SIGNALING_PATHWAY                                                  | Signaling | 0.000759961 | 0.043950813 | 0.57434465 | 2.027501177 | 28  | D4_G8 |
| GO_SIGNAL_RELEASE                                                                                  | Signaling | 9.02E-05    | 0.015560049 | 0.37744329 | 1.941999689 | 177 | D4_G8 |
| GO_CELL_SURFACE_RECEPTOR_SIGNALING_PATHWAY_INVOLVED_IN_CELL_CELL_SIGNALING                         | Signaling | 0.000793336 | 0.043950813 | 0.4387456  | 1.904531083 | 68  | D4_G8 |
| REACTOME_INTERFERON_SIGNALING                                                                      | Signaling | 0.000221533 | 0.020454881 | -0.3407803 | -1.80926779 | 156 | D4_G8 |
| GO_REGULATION_OF_SIGNAL_TRANSDUCTION_BY_P53_CLASS_MEDIATOR                                         | Signaling | 0.000112347 | 0.015560049 | -0.3824807 | -2.08646143 | 183 | D4_G8 |
