# Supplementary material for: A single cell transcriptional portrait of embryoid body differentiation and comparison to progenitors of the developing embryo
Source: PubMed Central journal article supplement — Stem Cell Res. Author manuscript; Available in PMC 2019 Jun 17. (PMC6579609; doi:10.1016/j.scr.2018.07.022), 2018-07-29
Supplement: NIHMS1506388-supplement-7.pdf [file NIHMS1506388-supplement-7.pdf]

**Supplementary Table 2: Identification of mouse orthologs for human EB genes**

| <b><u>Human EB cell type</u></b> | <b><u>Total differentially expressed genes</u></b> | <b><u>Number of mouse orthologs found</u></b> |
|----------------------------------|----------------------------------------------------|-----------------------------------------------|
| Day-4 pluripotent cell           | 405                                                | 389                                           |
| Day-4 neural progenitor          | 390                                                | 345                                           |
| Day-4 mesendodermal progenitor   | 299                                                | 284                                           |
| Day-8 endothelial progenitor     | 523                                                | 514                                           |
| Day-8 epithelial progenitor      | 498                                                | 489                                           |
| Day-8 liver progenitor           | 482                                                | 472                                           |
| Day-8 muscle progenitor          | 425                                                | 409                                           |
| Day-8 neural progenitor          | 789                                                | 775                                           |
| Day-8 stromal progenitor         | 844                                                | 824                                           |
