# Supplementary figures and images for: A single cell transcriptional portrait of embryoid body differentiation and comparison to progenitors of the developing embryo
Source: PubMed Central journal article supplement — Stem Cell Res. Author manuscript; Available in PMC 2019 Jun 17. (PMC6579609; doi:10.1016/j.scr.2018.07.022), 2018-07-29

# Supplemental Figure 1

**A**

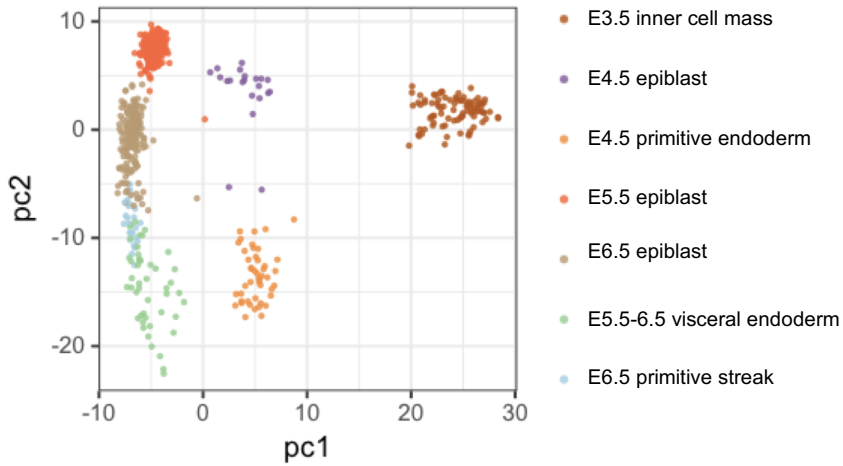

**B**

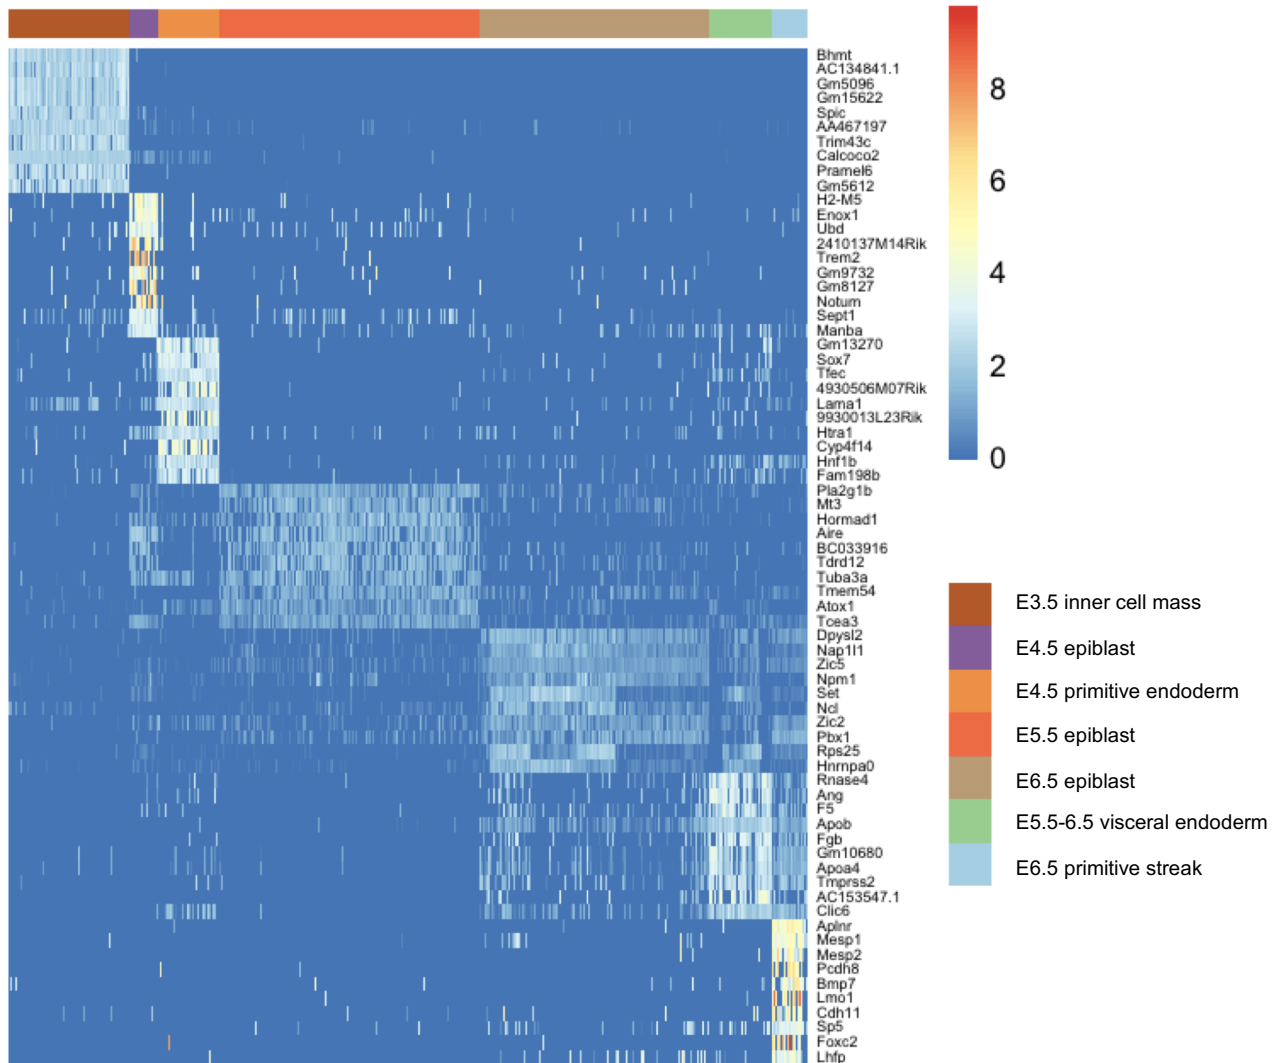

Supplement: NIHMS1506388-supplement-1.pdf [file NIHMS1506388-supplement-1.pdf]

# Supplemental Figure 2

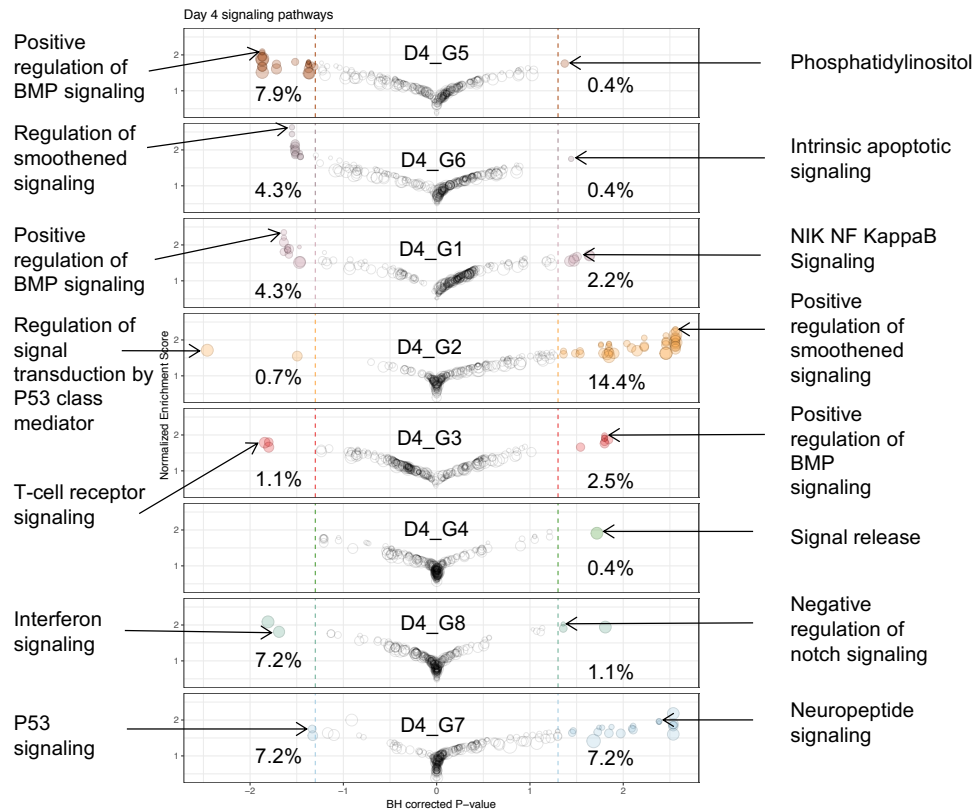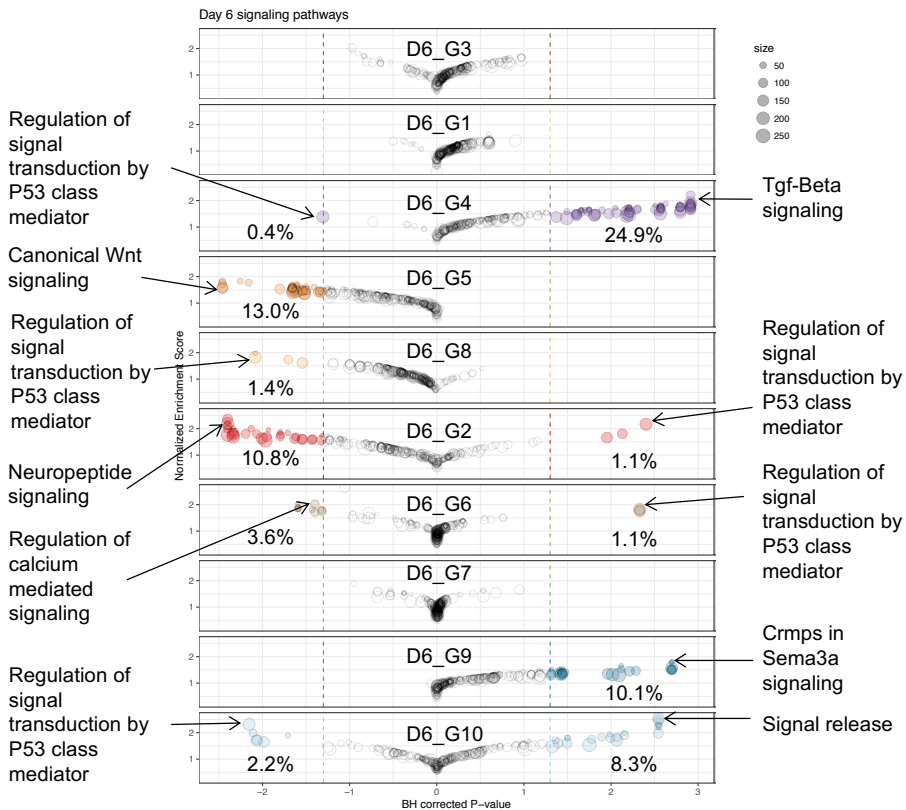

Supplement: NIHMS1506388-supplement-2.pdf [file NIHMS1506388-supplement-2.pdf]

# Supplemental Figure 3

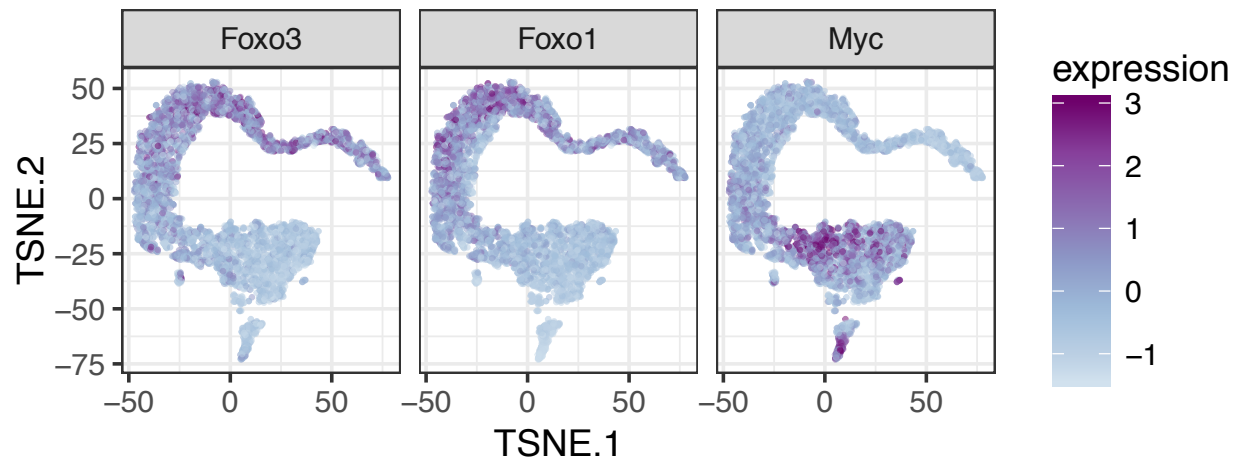

Supplement: NIHMS1506388-supplement-3.pdf [file NIHMS1506388-supplement-3.pdf]

# Supplemental Figure 4

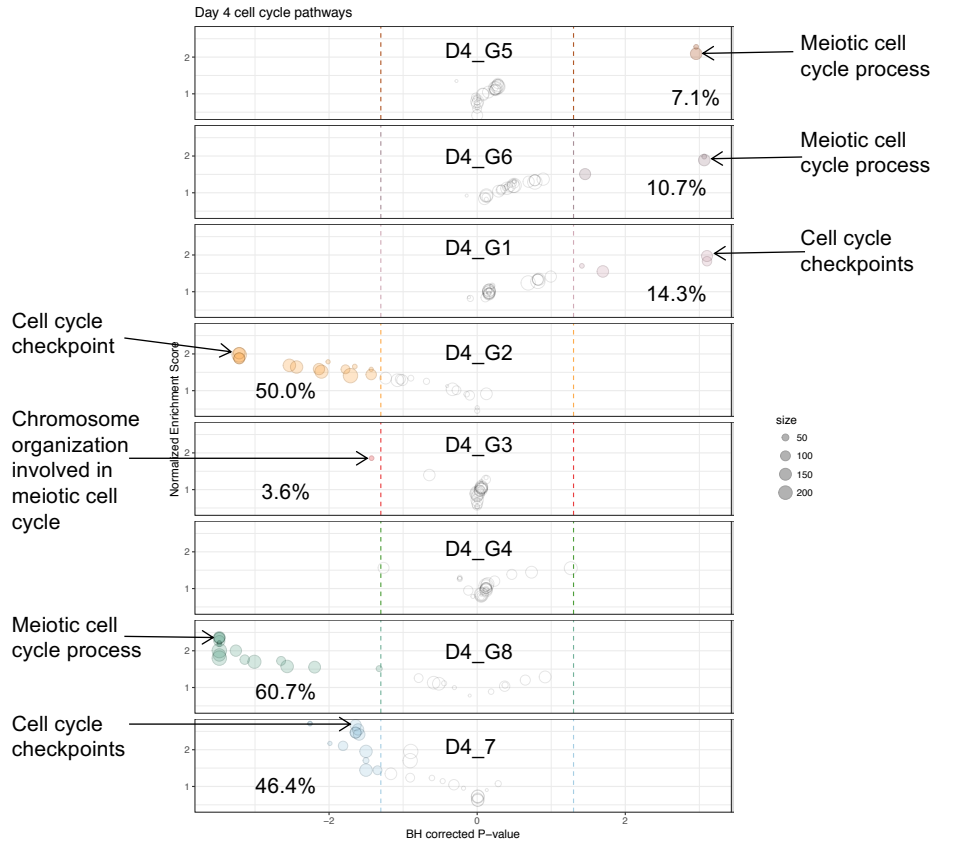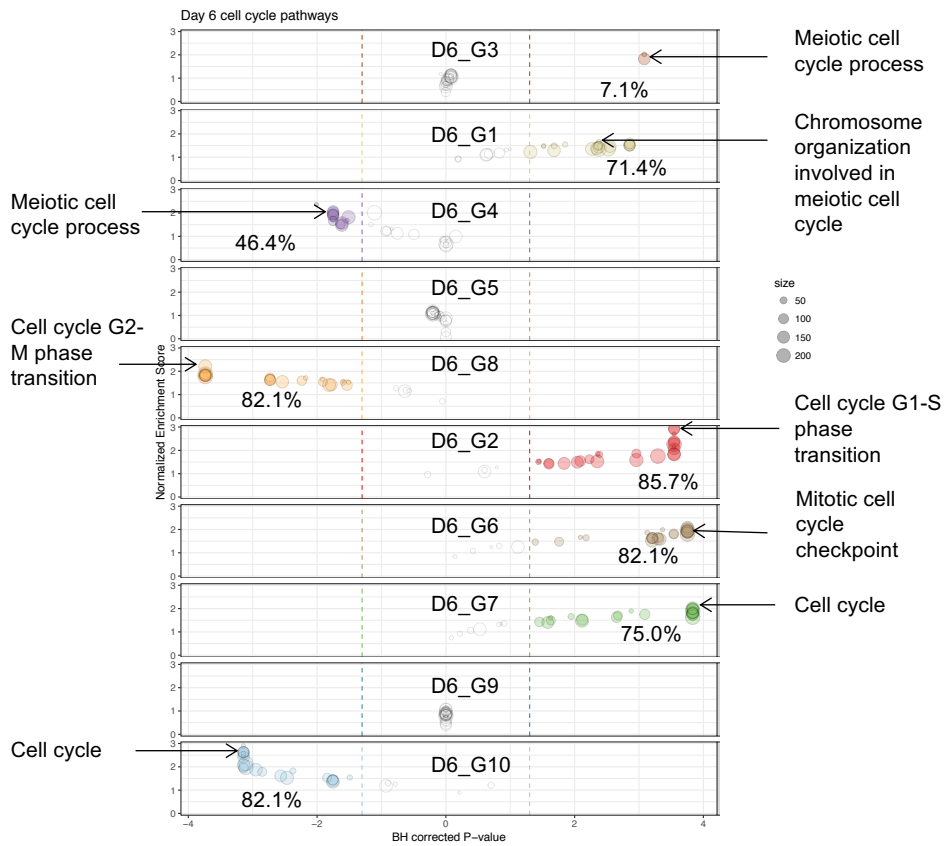

Supplement: NIHMS1506388-supplement-4.pdf [file NIHMS1506388-supplement-4.pdf]

# Supplemental Figure 5

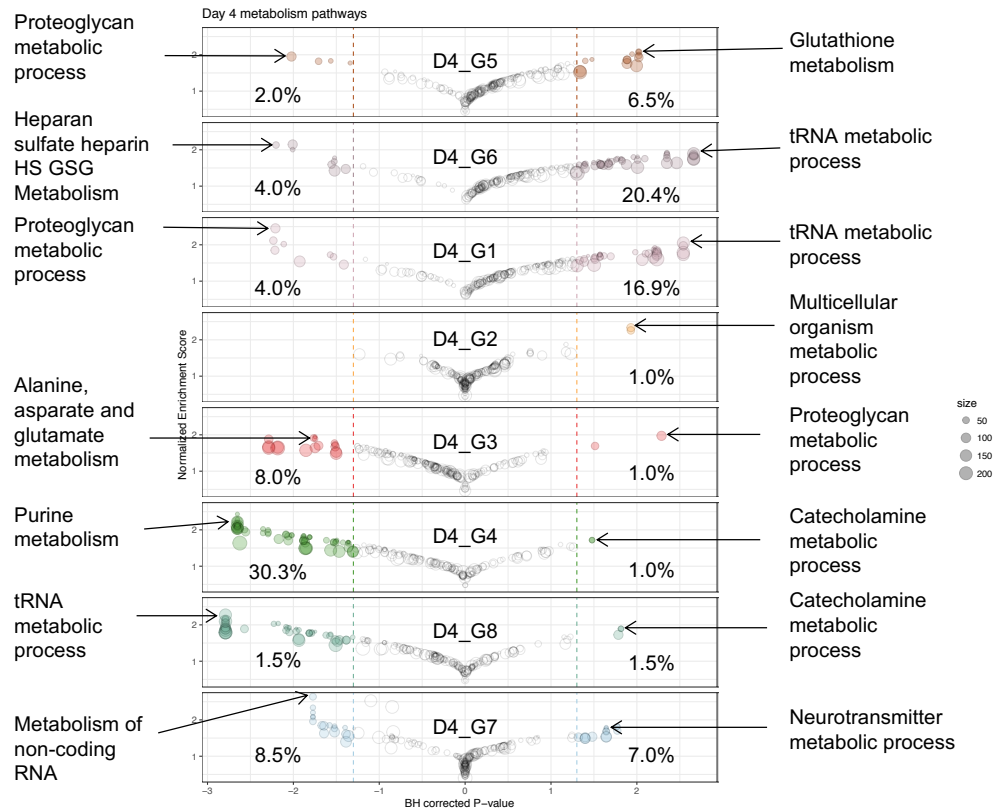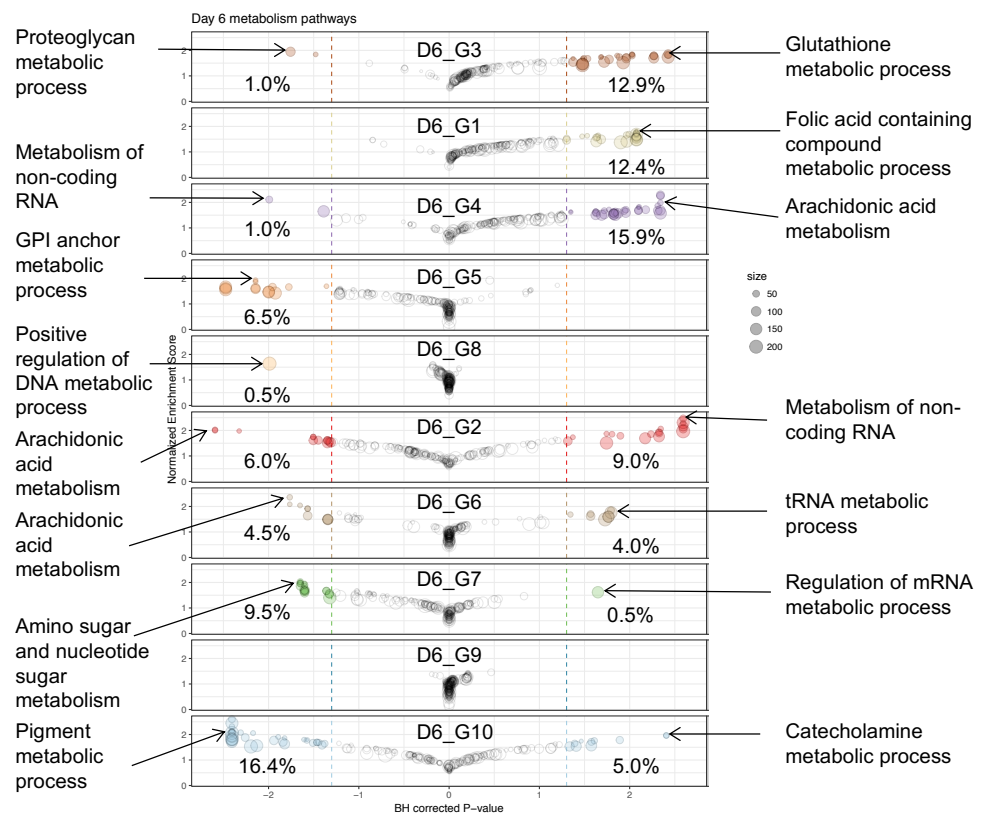

Supplement: NIHMS1506388-supplement-5.pdf [file NIHMS1506388-supplement-5.pdf]
